# Supplementary material
Source: Research Square preprint supplement (doi:10.21203/rs.3.rs-9265488/v1)
Supplement: Supplementary file 1 [file 0df48cf4d422b1a5a465bff8.pdf]

| Variable                        | Missing values, % | All, n=67          | T2D, n=11          | T2D+MASLD, n=33    | T2D+MASLD+F, n=23  | p value | Test           |
|---------------------------------|-------------------|--------------------|--------------------|--------------------|--------------------|---------|----------------|
| <i>General characteristics</i>  |                   |                    |                    |                    |                    |         |                |
| Age (years)                     | 0.0               | 59.8 ± 8.3         | 59.6 ± 8.7         | 59.4 ± 8.1         | 60.7 ± 8.7         | 0.851   | ANOVA          |
| Sex (F/M, %)                    | 0.0               | 56.7/43.3          | 63.6 /36.4         | 60.6/39.4          | 47.8/52.2          | 0.560   | Chi squared    |
| CAP (dB/m)                      | 0.0               | 319.5 ± 57.4       | 225.3 ± 34.3       | 332.3 ± 38.6       | 346.3 ± 42.0       | 0.000   | Kruskal-Wallis |
| Stiffness (Kpa)                 | 0.0               | 6.1 [4.8 - 7.9]    | 5 [4.35 - 5.8]     | 5.2 [4.4 - 6]      | 9.7 [7.9 - 11.9]   | 0.000   | Kruskal-Wallis |
| T2D duration (years)            | 5.97              | 6.0 [2.0 - 10.0]   | 5.0 [2.5 - 10.5]   | 6.0 [3.0 - 9.5]    | 6.0 [0.0 - 10]     | 0.864   | Kruskal-Wallis |
| <i>Glucose homeostasis</i>      |                   |                    |                    |                    |                    |         |                |
| Glucose (mg/dL)                 | 1.49              | 118 [107 - 133]    | 115 [105 - 129]    | 120 [108 - 129]    | 116 [109 - 144]    | 0.788   | Kruskal-Wallis |
| HbA1c (%)                       | 1.49              | 6.2 [5.8 - 6.9]    | 6 [5.6 - 6.9]      | 6.2 [5.9 - 6.5]    | 6.4 [5.8 - 6.9]    | 0.852   | Kruskal-Wallis |
| Insulin (uU/mL)                 | 17.9              | 20.8 ± 11.8        | 13.9 ± 4.8         | 19.0 ± 12.0        | 26.2 ± 11.8        | 0.017   | ANOVA          |
| HOMA-IR                         | 17.9              | 4.9 [3.8 - 7.0]    | 3.97 [3.3 - 4.4]   | 4.6 [3.5 - 6.8]    | 6.6 [4.6 - 10.9]   | 0.005   | Kruskal-Wallis |
| HOMA-B                          | 17.9              | 132.9 ± 72.9       | 115.7 ± 54.2       | 111.1 ± 52.3       | 169.0 ± 90.2       | 0.018   | ANOVA          |
| <i>Lipid homeostasis</i>        |                   |                    |                    |                    |                    |         |                |
| Triglycerides (mg/dL)           | 2.99              | 140 [93 - 191]     | 94 [79 - 123]      | 146 [89 - 191]     | 153 [105 - 217]    | 0.149   | Kruskal-Wallis |
| Total-Cho (mg/dL)               | 1.49              | 184.7 ± 35.0       | 179.2 ± 41.8       | 185.9 ± 32.8       | 185.7 ± 36.1       | 0.853   | ANOVA          |
| VLDL-Cho (mg/dL)                | 10.5              | 26.5 [18.8 - 38.0] | 19.0 [16.0 - 24.5] | 29.0 [18.0 - 38.0] | 29.5 [20.8 - 36.3] | 0.193   | Kruskal-Wallis |
| HDL-Cho (mg/dL)                 | 7.46              | 50.6 ± 11.3        | 58.6 ± 14.6        | 50.6 ± 10.3        | 46.4 ± 8.8         | 0.013   | ANOVA          |
| LDL-Cho (mg/dL)                 | 8.96              | 105.4 ± 32.5       | 97.2 ± 30.1        | 106.6 ± 30.8       | 108.1 ± 36.6       | 0.647   | ANOVA          |
| Remnant-Cho                     | 8.96              | 27 [19 - 38]       | 19 [16 - 25]       | 29 [18 - 38]       | 31 [21 - 43]       | 0.128   | Kruskal-Wallis |
| <i>Liver parameters</i>         |                   |                    |                    |                    |                    |         |                |
| Bilirubin (mg/dL)               | 10.4              | 0,53 ± 0,30        | 0,61 ± 0,39        | 0,47 ± 0,34        | 0,60 ± 0,18        | 0.231   | ANOVA          |
| Alkaline phosphatase, ALP (U/L) | 16.4              | 69,7 ± 20,5        | 71,7 ± 27,3        | 69,3 ± 18,0        | 69,4 ± 21,3        | 0.953   | ANOVA          |
| <i>Treatments</i>               |                   |                    |                    |                    |                    |         |                |
| DPP4                            | 0.0               | 17 (25.4)          | 2 (18.2)           | 10 (30.3)          | 5 (21.7)           | 0.643   | Chi squared    |
| GLP1                            | 0.0               | 12 (17.9)          | 1 (9.1)            | 7 (21.2)           | 4 (17.4)           | 0.660   | Chi squared    |

|                                                       |      |                 |                 |                 |                 |        |                |
|-------------------------------------------------------|------|-----------------|-----------------|-----------------|-----------------|--------|----------------|
| Metformin                                             | 0.0  | 42 (62.7)       | 6 (54.5)        | 22 (66.6)       | 14 (60.9)       | 0.753  | Chi squared    |
| SGLT2                                                 | 0.0  | 11 (16.4)       | 3 (27.3)        | 4 (12.1)        | 4 (17.4)        | 0.496  | Chi squared    |
| <i>Anthropometric parameters</i>                      |      |                 |                 |                 |                 |        |                |
| BMI (kg/m <sup>2</sup> )                              | 0.0  | 33.1 ± 4.0      | 31.1 ± 4.1      | 33.3 ± 4.1      | 33.6 ± 3.6      | 0.194  | ANOVA          |
| Waist circumference (cm)                              | 2.99 | 106.3 ± 10.8    | 100.6 ± 13.5    | 106.2 ± 9.5     | 109.4 ± 10.4    | 0.087  | ANOVA          |
| Body round index                                      | 2.99 | 6.6 [5.5 - 7.7] | 6.1 [4.9 - 7.6] | 6.4 [5.6 - 7.1] | 6.9 [5.8 - 8.0] | 0.326  | Kruskal-Wallis |
| Phase angel (degree)                                  | 1.49 | 5.6 ± 0.8       | 5.4 ± 0.5       | 5.6 ± 0.8       | 5.9 ± 0.8       | 0.144  | ANOVA          |
| Fat mass (%)                                          | 0.0  | 35.9 ± 7        | 34.2 ± 8.3      | 36.3 ± 6.9      | 36.0 ± 6.6      | 0.688  | ANOVA          |
| Fat free mass (%)                                     | 0.0  | 64.0 ± 7.0      | 65.8 ± 8.3      | 63.5 ± 7        | 64.0 ± 6.6      | 0.652  | ANOVA          |
| Muscle mass (%)                                       | 0.0  | 60.8 ± 6.7      | 62.5 ± 7.9      | 60.3 ± 6.7      | 60.8 ± 6.3      | 0.654  | ANOVA          |
| Total Body Water (%)                                  | 0.0  | 44.6 ± 5.8      | 46.3 ± 5.8      | 43.9 ± 6.6      | 45.0 ± 4.4      | 0.4798 | ANOVA          |
| Extracelullar Body Water (%)                          | 1.49 | 18.9 (1.5)      | 19.3 (2.0)      | 18.8 (1.4)      | 18.867 (1.256)  | 0.6681 | ANOVA          |
| Intracelullar Body Water (%)                          | 1.49 | 22.9 (3.3)      | 23.1 (3.9)      | 22.6 (3.4)      | 23.153 (2.996)  | 0.8381 | ANOVA          |
| <i>Biochemical variables</i>                          |      |                 |                 |                 |                 |        |                |
| Prothrombin activity (%)                              | 16.4 | 102.0 (14.0)    | 99.2 (23.3)     | 105.1 (8.2)     | 98.6 (15.0)     | 0.390  | Kruskal-Wallis |
| Albumin (g/dL)                                        | 10.4 | 4.6 (0.3)       | 4.5 (0.2)       | 4.6 (0.3)       | 4.7 (0.3)       | 0.266  | ANOVA          |
| Creatinine (mg/dL)                                    | 10.4 | 0.81 (0.21)     | 0.72 (0.11)     | 0.81 (0.27)     | 0.85 (0.14)     | 0.333  | ANOVA          |
| Platelets (x10 <sup>9</sup> cells/L)                  | 10.4 | 245.3 (58.2)    | 236.9 (38.2)    | 249.4 (60.8)    | 242.9 (63.1)    | 0.836  | ANOVA          |
| Potassium (mmol/L)                                    | 11.9 | 4.4 (0.3)       | 4.4 (0.3)       | 4.4 (0.3)       | 4.4 (0.3)       | 0.869  | ANOVA          |
| <i>Immunological parameters</i>                       |      |                 |                 |                 |                 |        |                |
| Basophils (%)                                         | 10.4 | 0.69 (0.28)     | 0.7 (0.32)      | 0.64 (0.26)     | 0.77 (0.30)     | 0.3159 | ANOVA          |
| Basophils (x10 <sup>3</sup> cells/mm <sup>3</sup> )   | 10.4 | 0.049 (0.024)   | 0.043 (0.022)   | 0.045 (0.016)   | 0.058 (0.032)   | 0.1163 | ANOVA          |
| Eosinophils (%)                                       | 10.4 | 3.03 (1.99)     | 3.16 (1.87)     | 2.92 (2.17)     | 3.12 (1.86)     | 0.5289 | Kruskal-Wallis |
| Eosinophils (x10 <sup>3</sup> cells/mm <sup>3</sup> ) | 10.4 | 0.22 (0.20)     | 0.20 (0.15)     | 0.22 (0.21)     | 0.24 (0.21)     | 0.5048 | Kruskal-Wallis |
| Immature granulocytes (%)                             | 10.4 | 0.39 (0.30)     | 0.34 (0.24)     | 0.36 (0.17)     | 0.46 (0.43)     | 0.5887 | Kruskal-Wallis |

|                                                        |      |                 |                 |                 |                 |        |                |
|--------------------------------------------------------|------|-----------------|-----------------|-----------------|-----------------|--------|----------------|
| Leukocytes (x10 <sup>3</sup> cells/mm <sup>3</sup> )   | 10.4 | 7.04 (1.65)     | 6.15 (0.95)     | 7.15 (1.36)     | 7.25 (2.14)     | 0.2149 | ANOVA          |
| Lymphocytes (%)                                        | 10.4 | 30.09 (6.48)    | 32.98 (6.0)     | 29.43 (6.17)    | 29.81 (7.06)    | 0.3488 | ANOVA          |
| Lymphocytes (x10 <sup>3</sup> cells/mm <sup>3</sup> )  | 10.4 | 2.09 (0.56)     | 2.02 (0.44)     | 2.08 (0.50)     | 2.13 (0.70)     | 0.897  | ANOVA          |
| Monocytes (%)                                          | 10.4 | 8.18 (1.95)     | 7.63 (1.43)     | 7.94 (2.06)     | 8.75 (1.9)      | 0.2261 | ANOVA          |
| Monocytes (x10 <sup>3</sup> cells/mm <sup>3</sup> )    | 10.4 | 0.57 (0.16)     | 0.47 (0.09)     | 0.57 (0.19)     | 0.62 (0.20)     | 0.1083 | ANOVA          |
| Neutrophils (%)                                        | 10.4 | 57.61 (6.75)    | 55.19 (5.8)     | 58.70 (6.97)    | 57.09 (6.75)    | 0.3612 | ANOVA          |
| Neutrophils (x10 <sup>3</sup> cells/mm <sup>3</sup> )  | 10.4 | 4.08 (1.14)     | 3.40 (0.62)     | 4.21 (0.98)     | 4.17 (1.43)     | 0.1525 | ANOVA          |
| <i>Hematological variables</i>                         |      |                 |                 |                 |                 |        |                |
| Mean corpuscular hemoglobin concentration (MCHC, g/dL) | 10.4 | 29.8 (1.7)      | 29.2 (2.2)      | 29.8 (1.4)      | 30.0 (1.9)      | 0.499  | ANOVA          |
| Hemoglobine (g/dL)                                     | 10.4 | 15.0 (1.3)      | 14.6 (1.0)      | 14.7 (1.1)      | 15.2 (1.7)      | 0.316  | ANOVA          |
| Red cells distribution width (RDW, %)                  | 11.9 | 13.5 (1.1)      | 14.0 (1.2)      | 13.1 (0.6)      | 13.8 (1.4)      | 0.122  | Kruskal-Wallis |
| <i>Cardiovascular parameters</i>                       |      |                 |                 |                 |                 |        |                |
| sBP (mmHg)                                             | 0.0  | 139 [128 - 150] | 132 [126 - 137] | 140 [127 - 150] | 140 [132 - 151] | 0.200  | Kruskal-Wallis |
| dBp (mmHg)                                             | 0.0  | 80 ± 11         | 77 ± 9          | 81 ± 12         | 81 ± 10         | 0.474  | ANOVA          |
| <i>Comorbilities</i>                                   |      |                 |                 |                 |                 |        |                |
| Cardiopathy: Related to T2D                            | 14.9 | 4 (6.1)         | 1 (9.1)         | 1 (3.0)         | 2 (8.7)         | 0.797  | Chi squared    |
| Cardiopathy: Non-related to T2D                        | 14.9 | 3 (4.6)         | 0 (0)           | 2 (6.1)         | 1 (4.3)         | 0.797  | Chi squared    |
| Nephropathy: Related to T2D                            | 14.9 | 1 (1.5)         | 0 (0)           | 1 (3.0)         | 0 (0)           | 0.393  | Chi squared    |
| Nephropathy: Non-related to T2D                        | 14.9 | 4 (6.1)         | 0 (0)           | 1 (3.0)         | 3 (13.0)        | 0.393  | Chi squared    |
| Retinopathy: Related to T2D                            | 0.0  | 2 (3.0)         | 0 (0)           | 1 (3.0)         | 1 (4.3)         | 0.784  | Chi squared    |

| Nutritional status                                                                                                             |      |                  |                  |                 |                  |       |             |
|--------------------------------------------------------------------------------------------------------------------------------|------|------------------|------------------|-----------------|------------------|-------|-------------|
| Calcium (mg/dL)                                                                                                                | 38.8 | 9.6 [9.4 - 9.9]  | 9.5 [9.25 - 10]  | 9.6 [9.4 - 9.8] | 9.7 [9.5 - 10.1] | 0.283 | ANOVA       |
| Vitamin B9 (nmol/L)                                                                                                            | 34.3 | 7.5 [5.4 - 10.6] | 9.7 [6.9 - 12.2] | 6.5 [5.1 - 9.8] | 7.8 [5.4 - 10.5] | 0.778 | ANOVA       |
| Vitamin B12 (pmol/L)                                                                                                           | 35.8 | 348 [275 - 431]  | 292 [250 - 408]  | 310 [264 - 423] | 399 [325 - 431]  | 0.418 | ANOVA       |
| <i>Mediterranean Diet Adherence *</i>                                                                                          |      |                  |                  |                 |                  |       |             |
| Do you use olive oil as the principal source of fat for cooking?                                                               | 0.0  | 61 (91.0)        | 11 (100)         | 29 (87.9)       | 21 (91.3)        | 0.475 | Chi squared |
| How much olive oil do you consume per day (including that used in frying, salads, meals eaten away from home, etc.)? ≥4 ts/day | 0.0  | 61 (91.0)        | 10 (90.9)        | 31 (93.9)       | 20 (87.0)        | 0.667 | Chi squared |
| How many servings of vegetables do you consume per day? ≥2 s/day or ≥1 garnish and side                                        | 0.0  | 27 (40.3)        | 6 (54.5)         | 17 (51.5)       | 4 (17.4)         | 0.026 | Chi squared |
| How many pieces of fruit (including fresh-squeezed juice) do you consume per day? ≥3 s/day                                     | 0.0  | 27 (40.3)        | 54 (36.4)        | 14 (42.4)       | 9 (39.1)         | 0.930 | Chi squared |
| How many servings of red meat, hamburger, or sausages do you consume per day? A full serving is 100–150 g, <1 s/day            | 0.0  | 43 (64.2)        | 10 (90.9)        | 20 (60.6)       | 13 (56.5)        | 0.123 | Chi squared |
| How many servings (12 g) of butter, margarine, or cream do you consume per day? <1 s/day                                       | 0.0  | 59 (88.1)        | 10 (90.9)        | 30 (90.9)       | 19 (82.6)        | 0.610 | Chi squared |

|                                                                                                                        |     |           |           |           |           |       |             |
|------------------------------------------------------------------------------------------------------------------------|-----|-----------|-----------|-----------|-----------|-------|-------------|
| How many carbonated and/or sugar-sweetened beverages do you consume per day? <1 s/day                                  | 0.0 | 59 (88.1) | 10 (90.9) | 30 (90.9) | 19 (82.6) | 0.610 | Chi squared |
| Do you drink wine? How much do you consume per week? ≥7cups/week                                                       | 0.0 | 14 (20.9) | 2 (18.2)  | 6 (18.2)  | 6 (26.1)  | 0.752 | Chi squared |
| How many servings (150 g) of legumees do you consume per week? ≥3s/week                                                | 0.0 | 15 (22.4) | 5 (45.4)  | 6 (18.2)  | 4 (17.4)  | 0.133 | Chi squared |
| How many servings of fish/seafood do you consume per week? 100–150 g of fish, 4–5 pieces or 200 g of seafood, ≥3s/week | 0.0 | 31 (46.3) | 6 (54.5)  | 15 (45.5) | 10 (43.5) | 0.825 | Chi squared |
| How many times do you consume commercial (not homemade) pastry such as cookies or cake per week? <2s/week              | 0.0 | 41 (61.2) | 6 (54.5)  | 20 (60.6) | 15 (65.2) | 0.833 | Chi squared |
| How many times do you consume nuts per week? 1 s = 30g, ≥3s/week                                                       | 0.0 | 36 (53.7) | 6 (54.5)  | 20 (60.6) | 10 (43.5) | 0.449 | Chi squared |
| Do you prefer to eat chicken, turkey or rabbit instead of beef, pork, hamburgers, or sausages?                         | 0.0 | 46 (68.7) | 10 (90.9) | 24 (72.7) | 12 (52.2) | 0.058 | Chi squared |
| How many times per week do you consume boiled vegetables, pasta, rice, or                                              | 0.0 | 34 (50.8) | 5 (45.4)  | 16 (48.5) | 13 (56.5) | 0.780 | Chi squared |

|                                                                                                                                                   |     |                                 |                              |                           |                              |             |             |
|---------------------------------------------------------------------------------------------------------------------------------------------------|-----|---------------------------------|------------------------------|---------------------------|------------------------------|-------------|-------------|
| other dishes with a sauce of tomato, garlic, onion, or leeks sautéed in olive oil (sofrito)? ≥2 s/week                                            |     |                                 |                              |                           |                              |             |             |
| SCORE HIGH VS LOW                                                                                                                                 | 0.0 | 40 (59.7)                       | 10 (90.9)                    | 19 (57.6)                 | 11 (47.8)                    | 0.053       | Chi squared |
| <i>Smoking habit</i>                                                                                                                              |     |                                 |                              |                           |                              |             |             |
| Smoking: never                                                                                                                                    | 1.5 | 30 (45.5)                       | 7 (63.6)                     | 17 (51.5)                 | 6 (26.1)                     | 0.109       | Chi squared |
| Smoking: former                                                                                                                                   | 1.5 | 6 (9.1)                         | 0 (0.0)                      | 4 (12.1)                  | 2 (8.7)                      | 0.109       | Chi squared |
| Smoking: current                                                                                                                                  | 1.5 | 30 (45.5)                       | 4 (36.4)                     | 11 (33.3)                 | 15 (65.2)                    | 0.109       | Chi squared |
| Cigarettes: never                                                                                                                                 | 1.5 | 30 (52.6)                       | 7 (70.0)                     | 17 (65.4)                 | 6 (28.5)                     | 0.093       | Chi squared |
| Cigarettes: light (1–10 cigarettes per day)                                                                                                       | 1.5 | 7 (12.3)                        | 1 (10.0)                     | 3 (11.5)                  | 3 (14.3)                     | 0.093       | Chi squared |
| Cigarettes: Moderate (11–19 cigarettes per day)                                                                                                   | 1.5 | 3 (5.3)                         | 0 (0.0)                      | 0 (0.0)                   | 3 (14.3)                     | 0.093       | Chi squared |
| Cigarettes: Heavy (≥20 cigarettes per day)                                                                                                        | 1.5 | 17 (29.8)                       | 2 (20.0)                     | 6 (23.1)                  | 9 (42.9)                     | 0.093       | Chi squared |
| Exposed vs. never exposed                                                                                                                         | 1.5 | 45.45 / 54.55                   | 57.14 / 63.64                | 46.88 / 53.12             | 73.91 / 26.09                | 0.058       | Chi squared |
| <i>Physical activity</i>                                                                                                                          |     |                                 |                              |                           |                              |             |             |
| During the last 7 days, on how many days did you do vigorous physical activities like heavy lifting, digging, aerobics, or fast bicycling? (days) | 0.0 | 0: 95.55% / 2: 2.99% / 7: 1.49% | 0: 90.91% / 2: 9.09% / 7: 0% | 0: 96.97% / 2: 3.03% / 0% | 0: 95.65% / 2: 0% / 7: 4.35% | Not applied |             |
| How much time did you usually spend doing vigorous physical activities on one of those days? (min)                                                | 0.0 | 30 min: 1.49%                   | 0                            | 0                         | 30 min : 4.35%               |             |             |

|                                                                                                                                                                                           |     |                                                                                           |                                                                    |                                                                      |                                                                                |                      |
|-------------------------------------------------------------------------------------------------------------------------------------------------------------------------------------------|-----|-------------------------------------------------------------------------------------------|--------------------------------------------------------------------|----------------------------------------------------------------------|--------------------------------------------------------------------------------|----------------------|
| During the last 7 days, on how many days did you do moderate physical activities like carrying light loads, bicycling at a regular pace, or doubles tennis? Do not include walking (days) | 0.0 | 0: 58.21% / 1: 5.97% / 2: 16.42% / 3: 5.97% / 4: 1.49% / 5: 7.46% / 6: 1.49% / 7: 2.99%   | 0: 54.55% / 1: 9.09% / 2: 18.18% / 4: 9.09% / 5: 9.09%             | 0: 57.58% / 1: 3.03% / 2: 21.21% / 5: 9.09% / 6: 3.03% / 7: 6.06%    | 0: 60.87% / 1: 8.70% / 2: 8.70% / 3: 17.39% / 5: 4.35%                         |                      |
| How much time did you usually spend doing moderate physical activities on one of those days? (min)                                                                                        | 0.0 | NA: 95.52 / 30 min: 4.48%                                                                 | 0                                                                  | 30 min : 3.03%                                                       | 30 min: 8.70%                                                                  |                      |
| During the last 7 days, on how many days did you walk for at least 10 minutes at a time? (days)                                                                                           | 0.0 | 0 : 14.92% / 1: 8.95% / 2: 7.46% / 3: 4.48% / 4: 2.99% / 5: 13.43% / 6: 4.48% / 7: 43.28% | 0 : 18.18% / 1: 9.09% / 3: 9.09% / 4: 9.09% / 5: 9.09% / 7: 45.45% | 0 : 12.12% / 1: 6.06% / 2: 15.15% / 5: 24.24% / 6: 3.03% / 7: 45.45% | 0 : 17.39% / 1: 13.04% / 2: 8.70% / 3: 8.70% / 4: 4.35% / 6: 8.70% / 7: 39.13% |                      |
| How much time did you usually spend walking on one of those days? (min)                                                                                                                   | 0.0 | 15 min: 10% / 20 min: 5% / 30 min: 80% / 45 min: 5%                                       | 15 min: 18.18%                                                     | 15 min: 3.03% / 30 min: 24.24%                                       | 15 min: 4.35% / 20 min: 4.35% / 30 min: 80% / 45 min: 26.09%                   |                      |
| During the last 7 days, how much time did you spend sitting on a week day? (hours: <=8h / >8h)                                                                                            | 0.0 | 82.09% / 17.91%                                                                           | 100% / 0%                                                          | 78.79% / 21.21%                                                      | 78.26% / 21.74%                                                                |                      |
| METs/week                                                                                                                                                                                 | 0.0 | 990 [ 636 - 1455 ]                                                                        | 693 [339 - 1794]                                                   | 990 [ 742 - 1470 ]                                                   | 876 [489 - 1288.2]                                                             | 0.479 Kruskal-Wallis |
| Sedentary (sitting minutes/day)                                                                                                                                                           | 0.0 | 300 [ 180-450 ]                                                                           | 240 [ 120 - 360]                                                   | 300 [ 180 - 420]                                                     | 360 [240 - 480 ]                                                               | 0.123 Kruskal-Wallis |

**Table S1.** Characterization of patients with T2D. Mean (standard deviation) / mean  $\pm$  standard deviation. Median [interquartile range]. ALT, alanine aminotransferase; APRI, AST to Platelet Ratio Index; AST, aspartate aminotransferase; CAP, controlled attenuation parameter; dBP, diastolic blood pressure; F, fibrosis; FIB-4, Fibrosis-4 index; GGT, gamma-glutamyl transferase; GM, gut microbiota; HbA1c, hemoglobin A1c; HDL-Cho, high-density lipoprotein cholesterol; HOMA-B, homeostatic model assessment of insulin secretion; HOMA-IR, homeostatic model assessment of insulin resistance; IQR, interquartile range; IR, insulin resistance; IPAQ, International Physical Activity Questionnaire; LDL-Cho, low-density lipoprotein cholesterol; LSM, liver stiffness measurement; MASLD, metabolic dysfunction-associated steatotic liver disease; MedDiet, Mediterranean diet; MEDAS, Mediterranean Diet adherence screener; METs, Metabolic Equivalent Task; n, number; NFS, NAFLD fibrosis score; PA, physical activity; Remnant-Cho, remnant cholesterol; s, serving; sBP, systolic blood pressure; T2D, type 2 diabetes; Total-Cho, total cholesterol; ts, tablespoon; VLDL-Cho, very-low-density lipoprotein cholesterol; vs., versus.

| Variables                                               | T2D vs T2D+MASLD | T2D vs T2D+MASLD+F | T2D+MASLD vs T2D+MASLD+F | Test                |
|---------------------------------------------------------|------------------|--------------------|--------------------------|---------------------|
| <i>Glucose homeostasis</i>                              |                  |                    |                          |                     |
| HOMA-IR                                                 | 0.093            | 0.005              | 0.073                    | Dunn + Holm         |
| HOMA-B                                                  | 0.811            | 0.327              | 0.085                    | Dunn + Holm         |
| <i>Biochemical parameters</i>                           |                  |                    |                          |                     |
| HDL-Cho                                                 | 0.249            | 0.057              | 0.269                    | Games-Howell        |
| <i>Anthropometry</i>                                    |                  |                    |                          |                     |
| Waist circumference                                     | 0.429            | 0.173              | 0.497                    | Games-Howell        |
| <i>Transaminases</i>                                    |                  |                    |                          |                     |
| GGT                                                     | 0.261            | 0.001              | 0.002                    | Dunn + Holm         |
| ALT                                                     | 0.198            | 0.002              | 0.006                    | Dunn + Holm         |
| AST                                                     | 0.355            | 0.004              | 0.004                    | Dunn + Holm         |
| <i>Non-invasive algorithms</i>                          |                  |                    |                          |                     |
| FIB-4                                                   | 0.566            | 0.748              | 0.198                    | Dunn + Holm         |
| APRI                                                    | 0.608            | 0.010              | 0.005                    | Dunn + Holm         |
| NFS                                                     | 1.00             | 1.00               | 1.00                     | Dunn + Holm         |
| <i>Lifestyle habits</i>                                 |                  |                    |                          |                     |
| MedDiet adherence, high vs. low                         | 0.134            | 0.071              | 0.588                    | Fisher + Bonferroni |
| Vegetables, $\geq 2$ s/day or $\geq 1$ garnish and side | 1.00             | 0.004              | 0.089                    | Fisher + Bonferroni |
| White meat preference over red meat                     | 0.408            | 0.158              | 0.316                    | Fisher + Bonferroni |
| Smoking exposure, exposed vs. never exposed             | 0.728            | 0.089              | 0.089                    | Fisher + Bonferroni |
| <i>GM</i>                                               |                  |                    |                          |                     |
| Chao1                                                   | 0.880            | 0.910              | 0.450                    | Mann-Whitney U test |
| Shannon                                                 | 0.860            | 0.830              | 0.880                    | Mann-Whitney U test |
| Simpson                                                 | 1.00             | 0.860              | 0.500                    | Mann-Whitney U test |

**Table S2.** Adjusted p values from cohort characterization. ALT, alanine aminotransferase; APRI, AST to Platelet Ratio Index; AST, aspartate aminotransferase; F, fibrosis; FIB-4, Fibrosis-4 index; GGT, gamma-glutamyl transferase; GM, gut microbiota; HDL-Cho, high-density lipoprotein cholesterol; HOMA-B, homeostatic model assessment of insulin secretion; HOMA-IR, homeostatic model assessment of insulin resistance; IQR, interquartile range; IR, insulin resistance; MASLD, metabolic dysfunction-associated steatotic liver disease; MedDiet, Mediterranean diet; n, number; NFS, NAFLD fibrosis score; T2D, type 2 diabetes; vs., versus.

| Cohort description (N=152) |             |             |             |                          |                                          |
|----------------------------|-------------|-------------|-------------|--------------------------|------------------------------------------|
| F/M (%)                    | Weight (kg) | Height (m)  | Age (years) | BMI (kg/m <sup>2</sup> ) | Obesity (BMI ≥30 kg/m <sup>2</sup> ) (%) |
| 46.7/53.3                  | 73.0 (15.0) | 1.70 (0.08) | 46.0(8.2)   | 25.1 (4.2)               | 10.5                                     |

**Table S3.** Controls from non-T2D cohort. BMI: body mass index; F: female; M=male.

| <b>Variables</b>                       | <b><math>\beta</math></b> | <b>Std. Error</b> | <b>Z value</b> | <b>p-value</b> |
|----------------------------------------|---------------------------|-------------------|----------------|----------------|
| <b>Smoking exposure</b>                | -0.208                    | 1.056             | -0.197         | n.s            |
| <b>Vegetables consumption</b>          | 1.076                     | 1.147             | 0.939          | n.s            |
| <b>White meat preference</b>           | -1.567                    | 1.342             | -1.168         | n.s            |
| <b>MedDiet adherence</b>               | -1.812                    | 1.601             | -.1131         | n.s            |
| <b><i>Megasphaera massiliensis</i></b> | 0.001                     | 0.002             | 0.344          | n.s            |
| <b><i>Clostridium saudiense</i></b>    | 0.003                     | 0.003             | 1.070          | n.s            |
| <b>ALT</b>                             | 0.040                     | 0.053             | 0.753          | n.s            |
| <b>HOMA-IR</b>                         | 0.690                     | 0.477             | 1.447          | n.s            |
| <b>HDL-Cho</b>                         | -0.072                    | 0.045             | -1.587         | n.s            |

**Table S4. Logistic regression model T2D vs. T2D+MASLD.** ALT = alanine aminotransferase; AST = aspartate aminotransferase; HDL-Cho = high-density lipoprotein cholesterol; HOMA-IR = homeostatic model assessment of insulin resistance. P-values  $\leq 0.1$  were considered statistically significant. P-values  $\leq 0.1$  were considered statistically significant.
