# Supplementary material
Source: Research Square preprint supplement (doi:10.21203/rs.3.rs-9265488/v1)
Supplement: Supplementary file 1 [file 3155fcac8ee0515e3b5fef2c.xlsx]

## Sheet: Sheet 1
192749-PROBI57-FG1547-3V-PI-19-01-5396-16S
