# Supplementary material
Source: Research Square preprint supplement (doi:10.21203/rs.3.rs-9265488/v1)
Supplement: Supplementary file 2 [file 546aaa65bb87557b96287292.xlsx]

## Sheet: Sheet 1
Sequencing_ID	Short_seq_ID	Sex	Age	Groups
188988-FG923-PI-19-01-418-16S	188988	M	58	F
188989-FG889-PI-19-01-419-16S	188989	M	52	HS
188991-FG795-PI-19-01-421-16S	188991	F	47	HS
188993-FG850-PI-19-01-423-16S	188993	M	58	F
188994-FG928-PI-19-01-424-16S	188994	M	54	HS
188995-FG915-PI-19-01-425-16S	188995	F	43	HS
188996-FG864-PI-19-01-426-16S	188996	M	64	F
188997-FG780-PI-19-01-427-16S	188997	F	53	HS
188998-FG936-PI-19-01-428-16S	188998	F	61	F
188999-FG916-PI-19-01-429-16S	188999	M	59	F
189000-FG962-PI-19-01-430-16S	189000	F	54	C
189003-FG985-PI-19-01-433-16S	189003	M	47	HS
189004-FG1428-PI-19-01-434-16S	189004	F	67	HS
189005-FG1433-PI-19-01-435-16S	189005	F	65	F
189006-FG1413-PI-19-01-436-16S	189006	F	61	HS
189007-FG965-PI-19-01-437-16S	189007	F	59	F
189008-FG901-PI-19-01-438-16S	189008	F	59	HS
189009-FG761-PI-19-01-439-16S	189009	F	66	F
189010-FG931-PI-19-01-440-16S	189010	F	65	HS
189011-FG975-PI-19-01-441-16S	189011	F	64	C
189012-FG976-PI-19-01-442-16S	189012	M	58	HS
189017-FG991-PI-19-01-447-16S	189017	F	56	HS
189018-FG967-PI-19-01-448-16S	189018	M	58	F
189019-FG970-PI-19-01-449-16S	189019	M	43	HS
189020-FG851-PI-19-01-450-16S	189020	M	62	F
189021-FG907-PI-19-01-451-16S	189021	M	57	HS
189022-FG758-PI-19-01-452-16S	189022	M	69	HS
189023-FG913-PI-19-01-453-16S	189023	M	52	HS
189024-FG986-PI-19-01-454-16S	189024	F	68	HS
189025-FG1006-PI-19-01-455-16S	189025	M	67	HS
189026-FG1028-PI-19-01-456-16S	189026	F	65	HS
189028-FG894-PI-19-01-458-16S	189028	F	62	HS
189029-FG1434-PI-19-01-459-16S	189029	M	53	HS
189030-FG1011-PI-19-01-460-16S	189030	F	71	F
189032-FG973-PI-19-01-462-16S	189032	M	63	F
189034-FG806-PI-19-01-464-16S	189034	F	69	HS
189035-FG918-PI-19-01-465-16S	189035	M	69	C
192197-PROBI51-FG1004-3V-PI-19-01-4964-16S	192197	F	51	HS
192198-PROBI52-FG1021-3V-PI-19-01-4965-16S	192198	M	51	F
192199-PROBI55-FG1022-3V-PI-19-01-4966-16S	192199	M	70	HS
190806-Probi58-FG-3V-PI-19-01-4933-16S	190806	M	74	F
190669-Probi59-FG-3V-PI-19-01-4923-16S	190669	M	67	C
191379-Probi60-FG988-3V-PI-19-01-4943-16S	191379	F	63	HS
190670-Probi61-FG-3V-PI-19-01-4924-16S	190670	F	75	F
192201-PROBI62-FG875-3V-PI-19-01-4968-16S	192201	M	62	C
192202-PROBI63-FG940-3V-PI-19-01-4969-16S	192202	M	72	F
190805-Probi64-FG-3V-PI-19-01-4932-16S	190805	M	62	HS
192750-PROBI67-FG1633-3V-PI-19-01-5397-16S	192750	F	42	C
190671-Probi68-FG-3V-PI-19-01-4925-16S	190671	F	65	HS
190672-Probi69-FG-3V-PI-19-01-4926-16S	190672	F	64	C
192205-PROBI70-FG1543-3V-PI-19-01-5385-16S	192205	F	59	HS
190673-Probi72-FG-3V-PI-19-01-4927-16S	190673	M	64	HS
192206-PROBI73-FG1614-3V-PI-19-01-5386-16S	192206	F	49	C
192207-PROBI74-FG1593-3V-PI-19-01-5387-16S	192207	F	73	HS
193091-PROBI75-FG1564-3V-PI-19-01-5407-16S	193091	F	56	HS
192243-PROBI76-FG1586-3V-PI-19-01-5394-16S	192243	F	54	F
190801-Probi77-FG-3V-PI-19-01-4928-16S	190801	F	69	F
192751-PROBI78-FG1590-3V-PI-19-01-5398-16S	192751	M	37	F
193092-PROBI79-FG1601-3V-PI-19-01-5408-16S	193092	F	55	F
192752-PROBI80-FG1592-3V-PI-19-01-5399-16S	192752	F	63	C
193093-PROBI81-FG1576-3V-PI-19-01-5409-16S	193093	F	58	HS
192753-PROBI82-FG1571-3V-PI-19-01-5400-16S	192753	F	61	F
193096-PROBI85-FG1551-3V-PI-19-01-5412-16S	193096	F	51	F
193097-PROBI86-FG1607-3V-PI-19-01-5413-16S	193097	F	71	HS
192754-PROBI87-FG1552-3V-PI-19-01-5401-16S	192754	F	68	C
192755-PROBI88-FG1588-3V-PI-19-01-5402-16S	192755	M	52	F
192756-PROBI89-FG1555-3V-PI-19-01-5403-16S	192756	M	54	C
