# Supplementary material
Source: Research Square preprint supplement (doi:10.21203/rs.3.rs-9265488/v1)
Supplement: Supplementary file 2 [file 38865e554718c89413d1a51f.pdf]

# Supplementary Figures

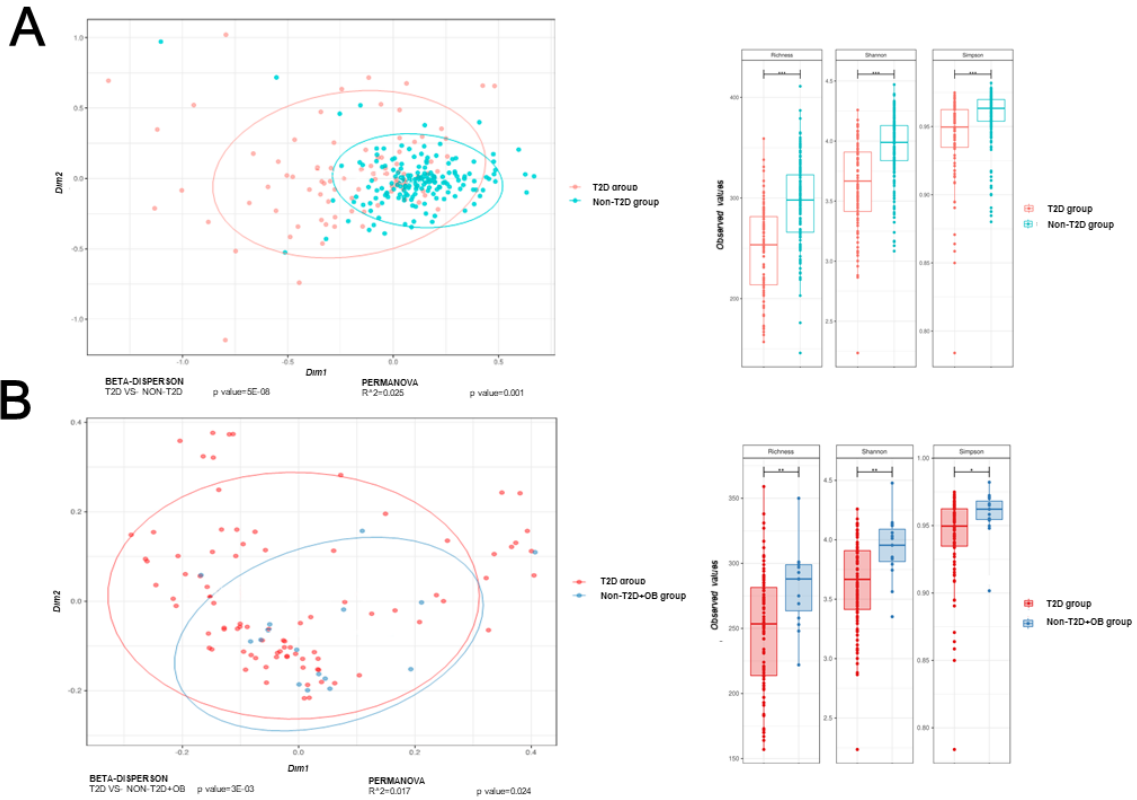

**Supplementary Figure 1. Comparison of GM:** (A) Non-T2D group vs. T2D group and (B) Non-T2D obese group vs. T2D group. Beta diversity assessed by PERMANOVA. Beta diversity assessed by PERMANOVA (left) and alpha diversity indices, including Chao1, Shannon, and Simpson (right). P-values  $\leq 0.05$  (\*),  $<0.01$  (\*\*), and  $<0.001$  (\*\*\*) were considered statistically significant. OB: obese; T2D: type 2 diabetes; GM: gut microbiota.
