# Supplementary material
Source: Research Square preprint supplement (doi:10.21203/rs.3.rs-9265488/v1)
Supplement: Supplementary file 3 [file c2f18e906c62933cf69a0a53.xlsx]

## Sheet: T2D vs T2D+HS
baseMean	log2FoldChange	lfcSE	stat	pvalue	padj	Domain	Phylum	Class	Order	Family	Genus	Species
756110097479	43302819063	0.9537756824	45401471084	5.6215e+08	0.0022767072	Bacteria	Bacteroidetes	Bacteroidia	Bacteroidales	Bacteroidaceae	Bacteroides	Bacteroides eggerthii
243166227992	5844824143	15699845241	37228546226	0.000196983	0.0398890482	Bacteria	Bacteroidetes	Bacteroidia	Bacteroidales	Rikenellaceae	Tidjanibacter	Tidjanibacter massiliensis
266359663566	71699634707	20357178911	35220810811	0.0004281732	0.0578033773	Bacteria	Proteobacteria	Gammaproteobacteria	Enterobacterales	Enterobacteriaceae	Klebsiella	Klebsiella pneumoniae;Klebsiella pneumoniae subsp. ozaenae
1657349172734	44358137634	12984088832	34163458221	0.0006346759	0.0642609366	Bacteria	Firmicutes	Clostridia	Clostridiales	Eubacteriaceae	Eubacterium	Eubacterium ruminantium
3652633932641	29578268587	0.9542466322	30996461073	0.0019375199	0.0676938816	Bacteria	Bacteroidetes	Bacteroidia	Bacteroidales	Bacteroidaceae	Bacteroides	Bacteroides stercoris
247544395077	47728930568	15392411116	3100809237	0.0019299258	0.0676938816	Bacteria	Firmicutes	Bacilli	Lactobacillales	Streptococcaceae	Streptococcus	Streptococcus pasteurianus
126992874475	70511322794	22752619184	30990420147	0.0019414749	0.0676938816	Bacteria	Firmicutes	Negativicutes	Veillonellales	Veillonellaceae	Megasphaera	Megasphaera massiliensis
106161454712	32822113836	10624173747	30893803713	0.0020057446	0.0676938816	Bacteria	Firmicutes	Clostridia	Clostridiales	Clostridiaceae	Clostridium	Clostridium saudiense
2147430327425	24526119234	0.7827634608	31332733915	0.0017286834	0.0676938816	Bacteria	Bacteroidetes	Bacteroidia	Bacteroidales	Rikenellaceae	Alistipes	Alistipes onderdonkii
364473641119	28015882261	0.8692359936	32230467292	0.0012683486	0.0676938816	Bacteria	Bacteroidetes	Bacteroidia	Bacteroidales	Rikenellaceae	Alistipes	Alistipes indistinctus
34749171563	-32378255026	0.9818466131	-32976897405	0.0009748379	0.0676938816	Bacteria	Firmicutes	Clostridia	Clostridiales	Lachnospiraceae	Lachnoclostridium	aldenense
73781776921	20999285341	0.6738975436	31160946558	0.0018326344	0.0676938816	Bacteria	Firmicutes	Clostridia	Clostridiales	Ruminococcaceae	Subdoligranulum	Subdoligranulum variabile
8650623074381	-20239077977	0.671343728	-30147117092	0.0025722362	0.0780581767	Bacteria	Firmicutes	Clostridia	Clostridiales	Lachnospiraceae	Unclassified	Unclassified
973456194425	19900660798	0.6680110453	29790915789	0.0028910436	0.0780581767	Bacteria	Firmicutes	Clostridia	Clostridiales	Lachnospiraceae	Blautia	gnavus
188989960911	28738185194	0.9597785855	2994251552	0.0027511902	0.0780581767	Bacteria	Bacteroidetes	Bacteroidia	Bacteroidales	Bacteroidaceae	Bacteroides	Bacteroides clarus
283826299116	50701390119	17529417634	28923602128	0.0038235929	0.0863056597	Bacteria	Proteobacteria	Gammaproteobacteria	Enterobacterales	Enterobacteriaceae	Klebsiella	Klebsiella variicola
285649167116	-27407389347	0.9603600219	-28538661255	0.0043190728	0.0863056597	Bacteria	Firmicutes	Erysipelotrichia	Erysipelotrichales	Erysipelotrichaceae	Erysipelatoclostridium	innocuum
93465769408	4188046534	14733298311	28425722778	0.0044751083	0.0863056597	Bacteria	Firmicutes	Clostridia	Clostridiales	Peptostreptococcaceae	Terrisporobacter	Terrisporobacter petrolearius
384214108601	27996688814	0.9729467727	28775149472	0.0040082092	0.0863056597	Bacteria	Bacteroidetes	Bacteroidia	Bacteroidales	Rikenellaceae	Alistipes	Alistipes senegalensis
75770536829	-17848382194	0.6275618609	-28440833176	0.00445394	0.0863056597	Bacteria	Firmicutes	Clostridia	Clostridiales	Clostridiales Family XIII. Incertae Sedis	Emergencia	Emergencia timonensis
22645220172	-28286457677	0.9755262695	-28996100425	0.0037362717	0.0863056597	Bacteria	Firmicutes	Clostridia	Clostridiales	Lachnospiraceae	Agathobacter	Agathobacter ruminis
221002517079	-30603522777	1096740189	-27904077087	0.0052641706	0.0969085949	Bacteria	Firmicutes	Clostridia	Clostridiales	Lachnospiraceae	Lachnoclostridium	scindens
4105994448	34246134091	12622155879	27131762924	0.0066641643	0.1173472404	Bacteria	Firmicutes	Clostridia	Clostridiales	Hungateiclostridiaceae	Ruminiclostridium	Ruminiclostridium hungatei
138235042734	-23955591638	0.8960889389	-26733497758	0.0075097903	0.1267277113	Bacteria	Firmicutes	Bacilli	Lactobacillales	Streptococcaceae	Streptococcus	Streptococcus parasanguinis
182540249605	38873981642	14780728779	26300449879	0.008537357	0.1383051827	Bacteria	Proteobacteria	Alphaproteobacteria	Rhodospirillales	Rhodospirillaceae	Rhodospirillum	Rhodospirillum rubrum
88519833475	41075696356	1575119445	26077829517	0.0091130718	0.1419536189	Bacteria	Firmicutes	Bacilli	Lactobacillales	Lactobacillaceae	Lactobacillus	Lactobacillus reuteri
15519243793661	-11565303696	0.4505148694	-25671302953	0.0102544073	0.1483226768	Bacteria	Firmicutes	Clostridia	Clostridiales	Lachnospiraceae	Blautia	Blautia wexlerae
3291336115265	19331380138	0.7517104976	25716522783	0.0101214493	0.1483226768	Bacteria	Bacteroidetes	Bacteroidia	Bacteroidales	Tannerellaceae	Parabacteroides	Parabacteroides merdae
453040164893	15267222319	0.606316279	25180294261	0.0118013461	0.1541788767	Bacteria	Bacteroidetes	Bacteroidia	Bacteroidales	Odoribacteraceae	Butyricimonas	Butyricimonas faecihominis
65457619963	53670445881	21202787002	25312920361	0.0113643186	0.1541788767	Bacteria	Verrucomicrobia	Verrucomicrobiae	Verrucomicrobiales	Verrucomicrobiaceae	Fucophilus	Fucophilus fucoidanolyticus
78677593689	30964642993	1228449136	25206288226	0.011714535	0.1541788767	Bacteria	Bacteroidetes	Bacteroidia	Bacteroidales	Bacteroidaceae	Bacteroides	Bacteroides mediterraneensis
22394789052	-2385262057	0.9718871638	-24542582161	0.0141175567	0.1732609231	Bacteria	Firmicutes	Clostridia	Clostridiales	Lachnospiraceae	Lachnoclostridium	celerecrescens
131269471864	16276849986	0.6627374545	24560027317	0.0140492089	0.1732609231	Bacteria	Firmicutes	Clostridia	Clostridiales	Ruminococcaceae	Paludicola	Paludicola psychrotolerans
5225619762619	-17358814714	0.7104704685	-24432844832	0.0145542595	0.1733669149	Bacteria	Firmicutes	Bacilli	Lactobacillales	Streptococcaceae	Streptococcus	Streptococcus salivarius
38651014833	30423050441	12580261651	24183161912	0.0155925211	0.1804277436	Bacteria	Firmicutes	Clostridia	Clostridiales	Hungateiclostridiaceae	Saccharofermentans	Saccharofermentans acetigenes
42499460365	23510900235	0.979070411	2401349277	0.0163347368	0.1837657886	Bacteria	Firmicutes	Clostridia	Clostridiales	Lachnospiraceae	Herbinix	Herbinix luporum
4056643418	-16585211659	0.6991511525	-23721925653	0.0176828721	0.1935557623	Bacteria	Firmicutes	Bacilli	Lactobacillales	Carnobacteriaceae	Granulicatella	Granulicatella adiacens
955945659206	32244813344	13831579159	23312459823	0.0197403928	0.2103910282	Archaea	Euryarchaeota	Methanobacteria	Methanobacteriales	Methanobacteriaceae	Methanobrevibacter	Methanobrevibacter smithii
12718277840307	27219433336	11861690933	22947346622	0.0217483351	0.225848095	Bacteria	Bacteroidetes	Bacteroidia	Bacteroidales	Bacteroidaceae	Bacteroides	Bacteroides plebeius
35132408675	19757058217	0.8934128609	22114141269	0.0270071725	0.2734476212	Bacteria	Firmicutes	Clostridia	Clostridiales	Lachnospiraceae	Caecibacterium	Caecibacterium sporoformans
109899408053	41801151553	19068515467	2192155526	0.0283682785	0.2802232392	Bacteria	Proteobacteria	Alphaproteobacteria	Rhodospirillales	Rhodospirillaceae	Novispirillum	Novispirillum itersonii
2372221468	15579996263	0.735475176	21183578685	0.0341447711	0.3292531504	Bacteria	Firmicutes	Clostridia	Clostridiales	Lachnospiraceae	Oribacterium	Oribacterium sinus
8892851811	12258883121	0.5840417922	20989736153	0.0358192267	0.3316295274	Bacteria	Bacteroidetes	Bacteroidia	Bacteroidales	Bacteroidaceae	Bacteroides	Bacteroides faecis
1127446214512	-13569366743	0.6500459731	-2087447243	0.0368477253	0.3316295274	Bacteria	Firmicutes	Clostridia	Clostridiales	Ruminococcaceae	Ruminococcus	Ruminococcus lactaris
82306522718	-13762597627	0.6572928436	-2093830438	0.0362750877	0.3316295274	Bacteria	Firmicutes	Clostridia	Clostridiales	Ruminococcaceae	Flavonifractor	Flavonifractor plautii
2514997691675	-13819945863	0.6756521807	-20454231124	0.0408131623	0.3443610566	Bacteria	Firmicutes	Clostridia	Clostridiales	Lachnospiraceae	Blautia	torques
86273638428	-14688052426	0.7153442821	-20532843827	0.0400450046	0.3443610566	Bacteria	Firmicutes	Clostridia	Clostridiales	Clostridiaceae	Hungatella	Hungatella hathewayi
9844322195	10725135394	0.5227518845	20516684325	0.0402018966	0.3443610566	Bacteria	Firmicutes	Clostridia	Clostridiales	Ruminococcaceae	Pseudoflavonifractor	Pseudoflavonifractor capillosus
3929013464124	12004704674	0.5945166587	20192377283	0.0434625167	0.3496736166	Bacteria	Firmicutes	Clostridia	Clostridiales	Ruminococcaceae	Unclassified	Unclassified
359618121994	29581710372	14657419744	20182072213	0.0435696844	0.3496736166	Bacteria	Firmicutes	Negativicutes	Acidaminococcales	Acidaminococcaceae	Acidaminococcus	Acidaminococcus intestini
1185564881235	25022025181	124254214	20137767867	0.0440329739	0.3496736166	Bacteria	Firmicutes	Erysipelotrichia	Erysipelotrichales	Erysipelotrichaceae	Turicibacter	Turicibacter sanguinis
138955161599	31653659472	15936353315	19862548757	0.0470050304	0.3660968712	Bacteria	Firmicutes	Erysipelotrichia	Erysipelotrichales	Erysipelotrichaceae	Faecalicoccus	Faecalicoccus acidiformans
4501642615663	16755338635	0.8831221349	18972844155	0.0577904107	0.3729043454	Bacteria	Firmicutes	Clostridia	Clostridiales	Ruminococcaceae	Ruminococcus	Ruminococcus champanellensis
2559838547538	14278115181	0.7557976706	1889145169	0.0588723794	0.3729043454	Bacteria	Firmicutes	Clostridia	Clostridiales	Eubacteriaceae	Eubacterium	eligens
1288109710614	-14443628532	0.764727248	-18887294221	0.0589280941	0.3729043454	Bacteria	Firmicutes	Bacilli	Lactobacillales	Streptococcaceae	Streptococcus	Streptococcus sinensis
3403149918887	16524326183	0.8423271441	19617468461	0.0497919649	0.3729043454	Bacteria	Bacteroidetes	Bacteroidia	Bacteroidales	Barnesiellaceae	Barnesiella	Barnesiella intestinihominis
351372650727	-12712282487	0.6681880616	-19025006906	0.0571057287	0.3729043454	Bacteria	Firmicutes	Bacilli	Lactobacillales	Streptococcaceae	Streptococcus	Streptococcus oralis;Streptococcus oralis subsp. dentisani
650475414773	15781339366	0.8214381174	19211842052	0.0547084887	0.3729043454	Bacteria	Actinobacteria	Coriobacteriia	Eggerthellales	Eggerthellaceae	Adlercreutzia	Adlercreutzia equolifaciens
33022474804	40761594028	2091213158	19491840835	0.051273445	0.3729043454	Bacteria	Proteobacteria	Gammaproteobacteria	Enterobacterales	Enterobacteriaceae	Raoultella	Raoultella planticola
49004687184	21038065386	11047805953	19042754259	0.0568743229	0.3729043454	Bacteria	Bacteroidetes	Bacteroidia	Bacteroidales	Barnesiellaceae	Coprobacter	Coprobacter secundus
77781632074	33756669762	17468948393	19323813318	0.0533124565	0.3729043454	Bacteria	Firmicutes	Clostridia	Clostridiales	Clostridiales Family XIII. Incertae Sedis	Anaerovorax	Anaerovorax odorimutans
153445685543	1832173133	0.933035282	19636697222	0.049568406	0.3729043454	Bacteria	Firmicutes	Clostridia	Clostridiales	Ruminococcaceae	Ruminococcus	Ruminococcus albus
263497197827	-13178714477	0.6849167216	-19241338489	0.0543378082	0.3729043454	Bacteria	Firmicutes	Bacilli	Lactobacillales	Streptococcaceae	Streptococcus	Streptococcus thermophilus
17106924286	-54542198668	28118031597	-193975878	0.0524090123	0.3729043454	Bacteria	Firmicutes	Clostridia	Clostridiales	Lachnospiraceae	Lachnoclostridium	citroniae
13325405842321	11787559849	0.6462592399	18239677084	0.0681569542	0.4044371601	Bacteria	Firmicutes	Clostridia	Clostridiales	Ruminococcaceae	Gemmiger	Gemmiger formicilis
5023882571996	15824469325	0.8631485973	18333424133	0.0667516657	0.4044371601	Bacteria	Bacteroidetes	Bacteroidia	Bacteroidales	Rikenellaceae	Alistipes	Alistipes putredinis
7088901155	53554934968	30161038717	1775632977	0.0757934309	0.4044371601	Bacteria	Bacteroidetes	Bacteroidia	Bacteroidales	Odoribacteraceae	Odoribacter	Odoribacter laneus
902167864988	11515386158	0.6482559467	17763641379	0.075672918	0.4044371601	Bacteria	Firmicutes	Clostridia	Clostridiales	Clostridiales Family XIII. Incertae Sedis	Ihubacter	Ihubacter massiliensis
113534100934	-24366671077	13375714807	-18217098248	0.0684990264	0.4044371601	Bacteria	Firmicutes	Bacilli	Lactobacillales	Streptococcaceae	Lactococcus	Lactococcus lactis;Lactococcus lactis subsp. cremoris
274114362074	-12400955478	0.6986370202	-17750212371	0.0758943807	0.4044371601	Bacteria	Firmicutes	Clostridia	Clostridiales	Lachnospiraceae	Anaerotignum	Anaerotignum lactatifermentans
319147323586	12410992575	0.6947659476	17863559115	0.0740416494	0.4044371601	Bacteria	Bacteroidetes	Bacteroidia	Bacteroidales	Rikenellaceae	Alistipes	Alistipes finegoldii
54186763986	24270096924	13529255593	17938974363	0.0728295407	0.4044371601	Bacteria	Actinobacteria	Actinobacteria	Bifidobacteriales	Bifidobacteriaceae	Bifidobacterium	Bifidobacterium animalis;Bifidobacterium animalis subsp. lactis
29001391403	28755395288	16119512872	17838873617	0.07444197	0.4044371601	Bacteria	Synergistetes	Synergistia	Synergistales	Synergistaceae	Cloacibacillus	Cloacibacillus porcorum
169219380668	-11982145736	0.6554935267	-18279579046	0.0675558696	0.4044371601	Bacteria	Firmicutes	Clostridia	Clostridiales	Lachnospiraceae	Merdimonas	Merdimonas faecis
15537963936	-31261162327	17372221084	-17994913935	0.0719409841	0.4044371601	Bacteria	Firmicutes	Clostridia	Clostridiales	Lachnospiraceae	Lachnoclostridium	symbiosum
12619304304	-50011812193	28136262807	-17774859631	0.0754883183	0.4044371601	Bacteria	Firmicutes	Clostridia	Clostridiales	Lachnospiraceae	Robinsoniella	Robinsoniella peoriensis
132002515865	15268874038	0.8747429857	17455268905	0.0808931958	0.4208799209	Bacteria	Firmicutes	Clostridia	Clostridiales	Lachnospiraceae	Abyssivirga	Abyssivirga alkaniphila
12154999815	25604122817	14726497457	17386430746	0.0820975648	0.4208799209	Bacteria	Firmicutes	Bacilli	Bacillales	Staphylococcaceae	Staphylococcus	Staphylococcus xylosus
17214879172	30108334973	17290239047	17413486818	0.0816224778	0.4208799209	Bacteria	Firmicutes	Clostridia	Clostridiales	Peptostreptococcaceae	Peptostreptococcus	Peptostreptococcus stomatis
10429086798516	17370378754	10320388566	16831128638	0.0923532447	0.4257947992	Bacteria	Bacteroidetes	Bacteroidia	Bacteroidales	Bacteroidaceae	Bacteroides	Bacteroides massiliensis
6161129817731	-14685032778	0.8569719407	-17135955194	0.086603037	0.4257947992	Bacteria	Firmicutes	Erysipelotrichia	Erysipelotrichales	Erysipelotrichaceae	Erysipelatoclostridium	spiroforme
325113696311	13281601426	0.7795402285	17037737042	0.0884233724	0.4257947992	Bacteria	Firmicutes	Clostridia	Clostridiales	Oscillospiraceae	Oscillibacter	Oscillibacter valericigenes
664750318103	10425003151	0.6197021449	16822602983	0.0925183761	0.4257947992	Bacteria	Proteobacteria	Deltaproteobacteria	Desulfovibrionales	Desulfovibrionaceae	Desulfovibrio	Desulfovibrio simplex
91553444667	-16472182488	0.9643607815	-17080933614	0.0876190205	0.4257947992	Bacteria	Firmicutes	Bacilli	Lactobacillales	Streptococcaceae	Streptococcus	Streptococcus gordonii
74897060591	-12235701806	0.7084114778	-17272026482	0.0841312754	0.4257947992	Bacteria	Actinobacteria	Actinobacteria	Actinomycetales	Actinomycetaceae	Actinomyces	Actinomyces oris
2850906656	32962353197	19578780452	16835754034	0.0922637556	0.4257947992	Bacteria	Tenericutes	Mollicutes	Entomoplasmatales	Spiroplasmataceae	Spiroplasma	Spiroplasma alleghenense
32666790044	-13916860398	0.8252498632	-16863814245	0.0917223569	0.4257947992	Bacteria	Firmicutes	Bacilli	Lactobacillales	Streptococcaceae	Streptococcus	Streptococcus vestibularis
10320428257	22085715509	1294906568	17055837119	0.0880856141	0.4257947992	Bacteria	Firmicutes	Bacilli	Lactobacillales	Leuconostocaceae	Leuconostoc	Leuconostoc carnosum
13009113912	-217836575	13106679527	-16620271714	0.0965073266	0.4391625536	Bacteria	Firmicutes	Bacilli	Lactobacillales	Streptococcaceae	Streptococcus	Streptococcus lactarius
12954859543	-15390712111	0.9371854692	-16422269249	0.1005429847	0.4521200685	Bacteria	Firmicutes	Bacilli	Lactobacillales	Streptococcaceae	Streptococcus	Streptococcus peroris
11839939167	-23422914142	14306639954	-16372058162	0.1015874722	0.4521200685	Bacteria	Firmicutes	Bacilli	Lactobacillales	Streptococcaceae	Streptococcus	Streptococcus constellatus;Streptococcus constellatus subsp. pharyngis
2218428456	37916690008	23296550064	16275667386	0.1036167866	0.4540794853	Bacteria	Bacteroidetes	Bacteroidia	Bacteroidales	Prevotellaceae	Alloprevotella	Alloprevotella rava
125600697395	1227401919	0.7555588386	16244954811	0.104270104	0.4540794853	Bacteria	Actinobacteria	Actinobacteria	Bifidobacteriales	Bifidobacteriaceae	Bifidobacterium	Bifidobacterium longum;Bifidobacterium longum subsp. suillum
23909492634	10705113671	0.6652521958	16091812606	0.1075767128	0.460998034	Bacteria	Bacteroidetes	Bacteroidia	Bacteroidales	Bacteroidaceae	Bacteroides	Bacteroides finegoldii
2012434442	17517789662	10903430736	16066309849	0.1081353413	0.460998034	Bacteria	Actinobacteria	Actinobacteria	Bifidobacteriales	Bifidobacteriaceae	Bifidobacterium	Bifidobacterium avesanii
38194321552	22095115083	13932029391	15859222273	0.112756953	0.4756933953	Bacteria	Firmicutes	Clostridia	Clostridiales	Lachnospiraceae	Butyrivibrio	Butyrivibrio crossotus
2538948502306	15063349144	0.9636291668	15631894159	0.1180080489	0.4878139062	Bacteria	Actinobacteria	Actinobacteria	Bifidobacteriales	Bifidobacteriaceae	Bifidobacterium	Bifidobacterium longum
94559468861	36865289745	23585360532	15630581392	0.1180389205	0.4878139062	Bacteria	Firmicutes	Negativicutes	Veillonellales	Veillonellaceae	Dialister	Dialister succinatiphilus
64544797259	-0.9589491063	0.615654011	-15576104259	0.1193256257	0.488150287	Bacteria	Firmicutes	Clostridia	Clostridiales	Lachnospiraceae	Lachnoclostridium	lavalense
186222255567	14670674964	0.9488444653	15461622532	0.1220653872	0.4894701168	Bacteria	Firmicutes	Clostridia	Clostridiales	Lachnospiraceae	Blautia	Blautia caecimuris
8212916056	13135996557	0.8479646348	15491208026	0.121352683	0.4894701168	Bacteria	Firmicutes	Clostridia	Clostridiales	Lachnospiraceae	Parasporobacterium	Parasporobacterium paucivorans
48890723664	12414035673	0.8076661996	15370255284	0.124287058	0.4934927304	Bacteria	Bacteroidetes	Bacteroidia	Bacteroidales	Bacteroidaceae	Bacteroides	Bacteroides intestinalis
5968530343936	0.829215271	0.5544536675	14955537669	0.1347699788	0.5299207903	Bacteria	Firmicutes	Clostridia	Clostridiales	Lachnospiraceae	Anaerostipes	Anaerostipes hadrus
5812057223591	0.8073728234	0.5450830361	14811923505	0.138555324	0.5336121359	Bacteria	Firmicutes	Clostridia	Clostridiales	Oscillospiraceae	Oscillibacter	Oscillibacter ruminantium
587687590086	14119812697	0.9554286588	14778510741	0.1394476443	0.5336121359	Bacteria	Actinobacteria	Coriobacteriia	Eggerthellales	Eggerthellaceae	Raoultibacter	Raoultibacter timonensis
38978134833	0.9976128155	0.6754076249	14770529362	0.1396614479	0.5336121359	Bacteria	Firmicutes	Clostridia	Clostridiales	Ruminococcaceae	Papillibacter	Papillibacter cinnamivorans
399889642264	1035955573	0.7065861205	14661419789	0.1426096114	0.5347860428	Bacteria	Bacteroidetes	Bacteroidia	Bacteroidales	Rikenellaceae	Alistipes	Alistipes obesi
13189294901	-21920152852	14928554532	-14683372596	0.1420126347	0.5347860428	Bacteria	Firmicutes	Bacilli	Lactobacillales	Leuconostocaceae	Leuconostoc	Leuconostoc gelidum
9104266858	-18191021938	12695258003	-14328989559	0.1518867157	0.5592192715	Bacteria	Firmicutes	Clostridia	Clostridiales	Ruminococcaceae	Drancourtella	Drancourtella massiliensis
35631170002	-12291214441	0.856775043	-14345906247	0.1514037878	0.5592192715	Bacteria	Firmicutes	Bacilli	Lactobacillales	Streptococcaceae	Streptococcus	Streptococcus rubneri
1333494095097	11063388161	0.7973786573	13874698124	0.16529855	0.5638873496	Bacteria	Bacteroidetes	Bacteroidia	Bacteroidales	Bacteroidaceae	Bacteroides	Bacteroides cellulosilyticus
121295306149	35534568527	25356684171	14013886156	0.1610978947	0.5638873496	Bacteria	Firmicutes	Erysipelotrichia	Erysipelotrichales	Erysipelotrichaceae	Absiella	Absiella dolichum
430213201726	10555618297	0.7415309358	14234899433	0.1545941754	0.5638873496	Bacteria	Firmicutes	Clostridia	Clostridiales	Lachnospiraceae	Anaerotaenia	Anaerotaenia torta
637421323919	11793955433	0.8508111132	13862013848	0.1656854188	0.5638873496	Bacteria	Firmicutes	Clostridia	Clostridiales	Ruminococcaceae	Negativibacillus	Negativibacillus massiliensis
667596074671	13620412302	0.9771383042	13939083387	0.1633452859	0.5638873496	Bacteria	Firmicutes	Clostridia	Clostridiales	Ruminococcaceae	Agathobaculum	Agathobaculum desmolans
16496511359	-14986693786	10682038777	-14029806575	0.1606226069	0.5638873496	Bacteria	Bacteroidetes	Bacteroidia	Bacteroidales	Odoribacteraceae	Butyricimonas	Butyricimonas virosa
27657030794	-13774717854	0.9798980406	-14057297068	0.1598044021	0.5638873496	Bacteria	Firmicutes	Erysipelotrichia	Erysipelotrichales	Erysipelotrichaceae	Holdemania	Holdemania massiliensis
10656356163	14466658896	10216593166	14159963758	0.1567765656	0.5638873496	Bacteria	Actinobacteria	Actinobacteria	Bifidobacteriales	Bifidobacteriaceae	Bifidobacterium	Bifidobacterium tissieri
1079813305	18263720293	13164693263	13873259276	0.1653424005	0.5638873496	Bacteria	Actinobacteria	Actinobacteria	Bifidobacteriales	Bifidobacteriaceae	Bifidobacterium	Bifidobacterium callitrichos
33160633895	46755087973	33897766715	13792970011	0.1678032008	0.5663358027	Bacteria	Actinobacteria	Coriobacteriia	Coriobacteriales	Coriobacteriaceae	Collinsella	Collinsella tanakaei
67193403945	-20984915979	15319100341	-13698530274	0.1707327851	0.5667768687	Bacteria	Firmicutes	Clostridia	Clostridiales	Lachnospiraceae	Lachnoclostridium	hylemonae
16225208549	1497322017	10908513859	13726177886	0.1698711989	0.5667768687	Bacteria	Bacteroidetes	Bacteroidia	Bacteroidales	Bacteroidaceae	Bacteroides	Bacteroides nordii
204928668678	0.613073852	0.4497913235	13630184044	0.1728767104	0.5692281927	Bacteria	Firmicutes	Clostridia	Clostridiales	Lachnospiraceae	Blautia	Blautia schinkii
2002398817268	16133249977	12231902385	13189485551	0.1871863119	0.5743216386	Bacteria	Proteobacteria	Betaproteobacteria	Burkholderiales	Sutterellaceae	Parasutterella	Parasutterella excrementihominis
751691080604	0.9290949301	0.6946467946	1337506971	0.1810572084	0.5743216386	Bacteria	Firmicutes	Clostridia	Clostridiales	Eubacteriaceae	Eubacterium	Eubacterium ventriosum
81644422762	-23511717911	17612638182	-13349344754	0.1818977931	0.5743216386	Bacteria	Proteobacteria	Gammaproteobacteria	Enterobacterales	Enterobacteriaceae	Enterobacter	Enterobacter cloacae
228571279357	10654804113	0.8046004203	13242354645	0.185424856	0.5743216386	Bacteria	Bacteroidetes	Bacteroidia	Bacteroidales	Odoribacteraceae	Butyricimonas	Butyricimonas paravirosa
29449398042	44991892649	33900448836	13271769016	0.1844501713	0.5743216386	Archaea	Euryarchaeota	Methanobacteria	Methanobacteriales	Methanobacteriaceae	Methanosphaera	Methanosphaera stadtmanae
165542418642	21396205412	15922247143	13437930726	0.1790153102	0.5743216386	Bacteria	Firmicutes	Bacilli	Lactobacillales	Streptococcaceae	Streptococcus	Streptococcus equinus
61052141022	0.8818504706	0.6658601565	13243778922	0.1853775731	0.5743216386	Bacteria	Firmicutes	Clostridia	Clostridiales	Lachnospiraceae	Blautia	Blautia marasmi
10300982435	-28858756926	21486499824	-13431111238	0.1792359942	0.5743216386	Bacteria	Actinobacteria	Actinobacteria	Bifidobacteriales	Bifidobacteriaceae	Bifidobacterium	Bifidobacterium scardovii
10785834001	-23904598879	18096972029	-13209170484	0.1865290246	0.5743216386	Bacteria	Proteobacteria	Gammaproteobacteria	Enterobacterales	Enterobacteriaceae	Citrobacter	Citrobacter europaeus
108687058848	4135186139	32068052772	12895033473	0.1972231534	0.5830319498	Bacteria	Bacteroidetes	Bacteroidia	Bacteroidales	Bacteroidaceae	Mediterranea	Mediterranea massiliensis
109514152938	0.9635128407	0.7406399626	13009193256	0.1932860704	0.5830319498	Bacteria	Firmicutes	Clostridia	Clostridiales	Ruminococcaceae	Anaerotruncus	Anaerotruncus rubiinfantis
47899849904	0.8445242828	0.648574574	13021236365	0.1928741243	0.5830319498	Bacteria	Bacteroidetes	Bacteroidia	Bacteroidales	Bacteroidaceae	Bacteroides	Bacteroides faecichinchillae
1321013391	2219018327	17182850686	12914145432	0.1965599703	0.5830319498	Bacteria	Firmicutes	Tissierellia	Tissierellales	Peptoniphilaceae	Parvimonas	Parvimonas micra
11568640775	22677499097	1755094092	12920959167	0.1963239298	0.5830319498	Bacteria	Bacteroidetes	Bacteroidia	Bacteroidales	Prevotellaceae	Prevotella	Prevotella jejuni
88805352326	0.7907157051	0.6159708838	1283690067	0.1992504213	0.5847566713	Bacteria	Firmicutes	Clostridia	Clostridiales	Christensenellaceae	Christensenella	Christensenella minuta
172040827106	0.6204036015	0.4893823482	12677277875	0.2048951779	0.5969967415	Bacteria	Firmicutes	Clostridia	Clostridiales	Lachnospiraceae	Lachnotalea	Lachnotalea glycerini
3624215198586	0.5718485287	0.4598254679	12436208271	0.2136391473	0.6180275331	Bacteria	Firmicutes	Clostridia	Clostridiales	Lachnospiraceae	Blautia	Blautia obeum
187385644486	-15331131124	12389759629	-1237403435	0.2159373442	0.6191833109	Bacteria	Firmicutes	Clostridia	Clostridiales	Ruminococcaceae	Ruminococcus	Ruminococcus flavefaciens
34530360039	-11127204863	0.9017406753	-12339694956	0.2172142713	0.6191833109	Bacteria	Firmicutes	Clostridia	Clostridiales	Clostridiaceae	Lactonifactor	Lactonifactor longoviformis
19472690089	0.9605382025	0.7833974964	12261185501	0.2201540661	0.6191833109	Bacteria	Actinobacteria	Coriobacteriia	Eggerthellales	Eggerthellaceae	Asaccharobacter	Asaccharobacter celatus
21909272701	16359330445	13313068928	12288173774	0.2191402847	0.6191833109	Bacteria	Actinobacteria	Actinobacteria	Bifidobacteriales	Bifidobacteriaceae	Bifidobacterium	Bifidobacterium pullorum
21425728558	11237384208	0.9277409666	12112631234	0.2257945771	0.6275913559	Bacteria	Bacteroidetes	Bacteroidia	Bacteroidales	Bacteroidaceae	Bacteroides	Bacteroides oleiciplenus
15325523163	13792044388	11397497987	12100940403	0.2262428098	0.6275913559	Bacteria	Firmicutes	Clostridia	Clostridiales	Peptococcaceae	Desulfitobacterium	Desulfitobacterium hafniense
182913071356	-0.8132329091	0.6776974825	-11999939944	0.2301416729	0.6340637926	Bacteria	Firmicutes	Clostridia	Clostridiales	Clostridiales Family XIII. Incertae Sedis	Aminipila	Aminipila butyrica
353602238632	14231316451	12106428671	11755173089	0.2397878165	0.6431395078	Bacteria	Bacteroidetes	Bacteroidia	Bacteroidales	Prevotellaceae	Paraprevotella	Paraprevotella clara
65087384862	29869556629	25408732108	1175562657	0.2397696853	0.6431395078	Bacteria	Candidatus Melainabacteria	Unclassified	Unclassified	Unclassified	Unclassified	Unclassified
20690811414	40014431022	33910040515	11800171989	0.2379933745	0.6431395078	Bacteria	Actinobacteria	Coriobacteriia	Coriobacteriales	Atopobiaceae	Libanicoccus	Libanicoccus massiliensis
0.9286956473	-14272381386	12064778838	-11829791144	0.2368174249	0.6431395078	Bacteria	Firmicutes	Bacilli	Lactobacillales	Lactobacillaceae	Lactobacillus	Lactobacillus rhamnosus
2305480247005	-18027690819	15500143167	-11630660843	0.2448026913	0.6522703288	Bacteria	Firmicutes	Negativicutes	Veillonellales	Veillonellaceae	Dialister	Dialister invisus
20113564376	25878661798	22519179095	1149183178	0.2504804558	0.6544811911	Bacteria	Bacteroidetes	Flavobacteriia	Flavobacteriales	Flavobacteriaceae	Coenonia	Coenonia anatina
12154848253	-16614820594	14424324171	-11518612863	0.2493780789	0.6544811911	Bacteria	Firmicutes	Bacilli	Lactobacillales	Leuconostocaceae	Leuconostoc	Leuconostoc mesenteroides;Leuconostoc mesenteroides subsp. jonggajibkimchii
12990466142	18507302332	16103994043	11492367845	0.2504583567	0.6544811911	Bacteria	Firmicutes	Clostridia	Clostridiales	Peptostreptococcaceae	Romboutsia	Romboutsia sedimentorum
25154803154813	0.534028624	0.4702500337	11356269765	0.2561127138	0.662899297	Bacteria	Bacteroidetes	Bacteroidia	Bacteroidales	Bacteroidaceae	Bacteroides	Bacteroides vulgatus
1276444744	32736609001	28879261983	11335680607	0.2569757769	0.662899297	Bacteria	Tenericutes	Mollicutes	Anaeroplasmatales	Anaeroplasmataceae	Asteroleplasma	Asteroleplasma anaerobium
367714859378	0.5728709699	0.5136319357	11153336273	0.2647074803	0.6732105223	Bacteria	Firmicutes	Clostridia	Clostridiales	Clostridiaceae	Butyricicoccus	Butyricicoccus faecihominis
57180407348	0.5874793685	0.5281116422	11124151062	0.2659597125	0.6732105223	Bacteria	Firmicutes	Clostridia	Clostridiales	Lachnospiraceae	Lachnoclostridium	polysaccharolyticum
51053115487	-21921672141	19613830979	-1117663967	0.2637105377	0.6732105223	Bacteria	Firmicutes	Erysipelotrichia	Erysipelotrichales	Erysipelotrichaceae	Breznakia	Breznakia pachnodae
11345199165645	-13003870607	11854887707	-10969206059	0.2726761001	0.6734995787	Bacteria	Verrucomicrobia	Verrucomicrobiae	Verrucomicrobiales	Akkermansiaceae	Akkermansia	Akkermansia muciniphila
4442667612041	0.6839878523	0.625938148	10927403202	0.2745078313	0.6734995787	Bacteria	Bacteroidetes	Bacteroidia	Bacteroidales	Tannerellaceae	Parabacteroides	Parabacteroides distasonis
410577268711	0.997032067	0.9153534328	10892317997	0.2760516792	0.6734995787	Bacteria	Firmicutes	Clostridia	Clostridiales	Eubacteriaceae	Eubacterium	Eubacterium xylanophilum
91446670662	0.981692591	0.8930051282	10993134978	0.2716313468	0.6734995787	Bacteria	Actinobacteria	Actinobacteria	Micrococcales	Micrococcaceae	Rothia	Rothia mucilaginosa
3915151196	14636835553	13420097713	10906653488	0.2754201632	0.6734995787	Bacteria	Proteobacteria	Gammaproteobacteria	Enterobacterales	Enterobacteriaceae	Escherichia	Escherichia coli
18508192157	0.8157953249	0.7439829264	10965242561	0.2728494143	0.6734995787	Bacteria	Firmicutes	Clostridia	Clostridiales	Lachnospiraceae	Eisenbergiella	Eisenbergiella massiliensis
57138876817	-0.5459124654	0.5049408025	-10811415173	0.2796341679	0.6781547184	Bacteria	Firmicutes	Clostridia	Clostridiales	Clostridiaceae	Falcatimonas	Falcatimonas natans
7093824603028	0.4754616217	0.4468547022	10640183921	0.2873203678	0.6817239311	Bacteria	Firmicutes	Clostridia	Clostridiales	Lachnospiraceae	Blautia	Blautia luti
1062961386236	0.8423844146	0.7993539543	10538315475	0.2919600472	0.6817239311	Bacteria	Firmicutes	Clostridia	Clostridiales	Lachnospiraceae	Roseburia	Roseburia intestinalis
30707688791	18354660381	17301048047	10608987578	0.2887359139	0.6817239311	Bacteria	Firmicutes	Bacilli	Lactobacillales	Lactobacillaceae	Lactobacillus	Lactobacillus salivarius
108826126464	12393302504	11789753379	10511926845	0.2931701024	0.6817239311	Bacteria	Bacteroidetes	Bacteroidia	Bacteroidales	Tannerellaceae	Parabacteroides	Parabacteroides goldsteinii
385291217441	15532870592	14503641786	10709634739	0.2841858535	0.6817239311	Bacteria	Proteobacteria	Betaproteobacteria	Burkholderiales	Sutterellaceae	Sutterella	Sutterella wadsworthensis
221042532733	-0.4430325752	0.424744975	-10430554834	0.2969225967	0.6817239311	Bacteria	Firmicutes	Clostridia	Clostridiales	Ruminococcaceae	Pseudoflavonifractor	Pseudoflavonifractor phocaeensis
45187589258	15028626028	14438604861	10408641398	0.2979386069	0.6817239311	Bacteria	Firmicutes	Clostridia	Clostridiales	Clostridiales Family XIII. Incertae Sedis	Mogibacterium	Mogibacterium neglectum
27255880413	20169152649	19127815318	10544409967	0.2916810609	0.6817239311	Bacteria	Proteobacteria	Gammaproteobacteria	Enterobacterales	Enterobacteriaceae	Klebsiella	Klebsiella aerogenes
20538485327	-11025042135	10542347621	-10457862453	0.2956597331	0.6817239311	Bacteria	Actinobacteria	Actinobacteria	Bifidobacteriales	Bifidobacteriaceae	Bifidobacterium	Bifidobacterium apri
11980122685	-10331506683	0.9858000595	-10480326699	0.2946235551	0.6817239311	Bacteria	Actinobacteria	Actinobacteria	Bifidobacteriales	Bifidobacteriaceae	Bifidobacterium	Bifidobacterium ramosum
12150455016681	-1357866753	13504397724	-10054996755	0.3146563056	0.684009565	Bacteria	Actinobacteria	Actinobacteria	Bifidobacteriales	Bifidobacteriaceae	Bifidobacterium	Bifidobacterium pseudocatenulatum
2037873342667	0.7953486464	0.7984674418	0.996094023	0.3192044637	0.684009565	Bacteria	Bacteroidetes	Bacteroidia	Bacteroidales	Bacteroidaceae	Bacteroides	Bacteroides xylanolyticus
20843750234	-14255771306	14182812275	-10051441865	0.314827426	0.684009565	Bacteria	Firmicutes	Clostridia	Clostridiales	Lachnospiraceae	Anaerostipes	Anaerostipes caccae
30455994617	-23809309268	23196035433	-1026438735	0.3046848277	0.684009565	Bacteria	Bacteroidetes	Bacteroidia	Bacteroidales	Muribaculaceae	Muribaculum	Muribaculum intestinale
12838105208	33104258888	3279268204	1009501414	0.3127342238	0.684009565	Bacteria	Proteobacteria	Betaproteobacteria	Burkholderiales	Sutterellaceae	Parasutterella	Parasutterella secunda
50483352623	0.6605644244	0.6538089371	101033251	0.3123360105	0.684009565	Bacteria	Firmicutes	Clostridia	Clostridiales	Eubacteriaceae	Intestinibacillus	Intestinibacillus massiliensis
110425155087	0.5565711316	0.5493067987	10132245458	0.3109529187	0.684009565	Bacteria	Firmicutes	Clostridia	Clostridiales	Clostridiaceae	Lutispora	Lutispora thermophila
25987042009	-27145938084	27139188901	-10002486877	0.3171901725	0.684009565	Bacteria	Proteobacteria	Gammaproteobacteria	Enterobacterales	Enterobacteriaceae	Kluyvera	Kluyvera cryocrescens
55804142477	-17051420447	16773264016	-10165833216	0.3093516917	0.684009565	Bacteria	Firmicutes	Bacilli	Lactobacillales	Enterococcaceae	Enterococcus	Enterococcus saigonensis
20532175923	0.7148291129	0.7159574006	0.9984240855	0.3180737592	0.684009565	Bacteria	Firmicutes	Clostridia	Clostridiales	Lachnospiraceae	Faecalicatena	Faecalicatena contorta
19681488841	19500244564	19477765856	10011540702	0.3167523277	0.684009565	Bacteria	Firmicutes	Clostridia	Clostridiales	Lachnospiraceae	Faecalicatena	Faecalicatena fissicatena
15751115519	0.920252152	0.8959217788	10271568052	0.3043466339	0.684009565	Bacteria	Actinobacteria	Actinobacteria	Bifidobacteriales	Bifidobacteriaceae	Bifidobacterium	Bifidobacterium pseudolongum
1607338124829	0.5061947717	0.5110558224	0.9904882198	0.3219355443	0.6862310286	Bacteria	Bacteroidetes	Bacteroidia	Bacteroidales	Bacteroidaceae	Bacteroides	Bacteroides dorei
33191563542	0.8010354349	0.8119668812	0.9865370785	0.3238696295	0.6867392668	Bacteria	Firmicutes	Clostridia	Clostridiales	Lachnospiraceae	Anaerosporobacter	Anaerosporobacter mobilis
102153095123	0.9369369654	0.9583792843	0.9776264791	0.3282590962	0.692421531	Bacteria	Firmicutes	Bacilli	Lactobacillales	Lactobacillaceae	Lactobacillus	Lactobacillus sakei
11376352385	31404113939	32486667246	0.9666769971	0.3337055299	0.7002628994	Bacteria	Tenericutes	Mollicutes	Entomoplasmatales	Spiroplasmataceae	Spiroplasma	Spiroplasma cantharicola
11903991328	13709008962	14273004643	0.9604851469	0.3368111028	0.7031365807	Bacteria	Firmicutes	Clostridia	Clostridiales	Clostridiaceae	Clostridium	Clostridium tertium
18747224208	-14248674837	14940983986	-0.9536637514	0.3402538743	0.7066811236	Bacteria	Proteobacteria	Gammaproteobacteria	Enterobacterales	Enterobacteriaceae	Enterobacter	Enterobacter tabaci
88363028119	0.8920272605	0.939663392	0.9493051109	0.3424654549	0.7076454553	Bacteria	Firmicutes	Clostridia	Clostridiales	Ruminococcaceae	Ethanoligenens	Ethanoligenens harbinense
12329342512	-0.7986607982	0.8555210528	-0.9335372818	0.3505426306	0.7206587075	Bacteria	Firmicutes	Erysipelotrichia	Erysipelotrichales	Erysipelotrichaceae	Dielma	Dielma fastidiosa
5207799535872	16876931597	1834926305	0.9197607311	0.3576978084	0.7279779517	Bacteria	Firmicutes	Erysipelotrichia	Erysipelotrichales	Erysipelotrichaceae	Holdemanella	Holdemanella biformis
70362394648	-10797537287	11721217265	-0.9211959	0.3569481585	0.7279779517	Bacteria	Firmicutes	Clostridia	Clostridiales	Peptococcaceae	Peptococcus	Peptococcus niger
11810955424	-1074291828	11956444255	-0.8985044425	0.3689166778	0.7470562726	Bacteria	Actinobacteria	Coriobacteriia	Coriobacteriales	Coriobacteriaceae	Collinsella	Collinsella intestinalis
20202342984	14984461745	16965002427	0.8832572709	0.3770972845	0.7569719124	Bacteria	Firmicutes	Bacilli	Lactobacillales	Lactobacillaceae	Lactobacillus	Lactobacillus mucosae
18265895654	10502068495	11901482171	0.8824168574	0.377551423	0.7569719124	Bacteria	Firmicutes	Clostridia	Clostridiales	Clostridiaceae	Thermotalea	Thermotalea metallivorans
175608594227	0.6710175105	0.7744505152	0.8664433651	0.3862470717	0.7668140393	Bacteria	Firmicutes	Clostridia	Clostridiales	Lachnospiraceae	Lachnoclostridium	glycyrrhizinilyticum
95973629763	0.9638623261	11119318853	0.8668357647	0.386032003	0.7668140393	Bacteria	Firmicutes	Clostridia	Clostridiales	Ruminococcaceae	Acetivibrio	Acetivibrio ethanolgignens
57746643881	10303340191	12228669227	0.8425561277	0.3994767364	0.7853790206	Bacteria	Firmicutes	Clostridia	Clostridiales	Eubacteriaceae	Rhabdanaerobium	Rhabdanaerobium thermarum
25052069077	-20775062042	24606665083	-0.8442859677	0.3985096254	0.7853790206	Bacteria	Bacteroidetes	Bacteroidia	Bacteroidales	Tannerellaceae	Parabacteroides	Parabacteroides faecis
2322912938665	-0.4721594452	0.5716841163	-0.8259096794	0.4088553294	0.7922794661	Bacteria	Firmicutes	Clostridia	Clostridiales	Ruminococcaceae	Ruminococcus	Ruminococcus faecis
168108247354	-0.4465939347	0.5396430371	-0.8275728658	0.4079124404	0.7922794661	Bacteria	Actinobacteria	Actinobacteria	Actinomycetales	Actinomycetaceae	Schaalia	Schaalia odontolytica
57427548598	0.7881058108	0.9489769844	0.8304793728	0.4062678055	0.7922794661	Bacteria	Firmicutes	Clostridia	Clostridiales	Peptococcaceae	Desulfohalotomaculum	Desulfohalotomaculum halophilum
11064299921	0.8155546406	0.9930940208	0.8212260103	0.4115175435	0.7936409768	Bacteria	Firmicutes	Erysipelotrichia	Erysipelotrichales	Erysipelotrichaceae	Erysipelatoclostridium	Erysipelatoclostridium ramosum
999225141119	0.5896665773	0.7234723844	0.8150505672	0.4150433656	0.7949367692	Bacteria	Actinobacteria	Coriobacteriia	Eggerthellales	Eggerthellaceae	Eggerthella	Eggerthella lenta
17273783476	10202155539	1254600407	0.8131796771	0.4161150496	0.7949367692	Bacteria	Actinobacteria	Actinobacteria	Actinomycetales	Actinomycetaceae	Actinomyces	Actinomyces johnsonii
370057241535	0.4794904146	0.5930844557	0.80846903	0.4188206275	0.7963490805	Bacteria	Firmicutes	Clostridia	Clostridiales	Ruminococcaceae	Ruthenibacterium	Ruthenibacterium lactatiformans
1465006546757	0.5274975267	0.6665059632	0.7914370702	0.428688985	0.7964176097	Bacteria	Firmicutes	Clostridia	Clostridiales	Lachnospiraceae	Roseburia	Roseburia inulinivorans
552320884492	-0.6310224233	0.7914742677	-0.7972747177	0.4252915003	0.7964176097	Bacteria	Actinobacteria	Actinobacteria	Bifidobacteriales	Bifidobacteriaceae	Bifidobacterium	Bifidobacterium callitrichidarum
76698070454	-0.9022037028	11273284233	-0.8003024533	0.4235355821	0.7964176097	Bacteria	Firmicutes	Clostridia	Clostridiales	Lachnospiraceae	Lachnoclostridium	asparagiforme
69559207169	0.9711582544	12255175067	0.7924474755	0.4280998065	0.7964176097	Bacteria	Firmicutes	Clostridia	Clostridiales	Eubacteriaceae	Irregularibacter	Irregularibacter muris
17216087635	0.9325911555	11679077475	0.798514401	0.4245720395	0.7964176097	Bacteria	Bacteroidetes	Bacteroidia	Bacteroidales	Rikenellaceae	Alistipes	Alistipes timonensis
106176308391	0.690052215	0.8824735504	0.7819522916	0.4342426119	0.799401172	Bacteria	Actinobacteria	Coriobacteriia	Eggerthellales	Eggerthellaceae	Gordonibacter	Gordonibacter pamelaeae
14670488201	-18600250047	23688353064	-0.7852065526	0.4323324742	0.799401172	Bacteria	Proteobacteria	Gammaproteobacteria	Enterobacterales	Pectobacteriaceae	Pectobacterium	Pectobacterium carotovorum
10443871554	-0.7147036373	0.9183645053	-0.7782352575	0.436430335	0.7997931479	Bacteria	Synergistetes	Synergistia	Synergistales	Synergistaceae	Thermanaerovibrio	Thermanaerovibrio velox
38950870155	-12572853152	16267971124	-0.7728593232	0.4396056403	0.8019832627	Bacteria	Actinobacteria	Coriobacteriia	Coriobacteriales	Atopobiaceae	Olsenella	Olsenella uli
115798522611	11422965136	15022044686	0.7604134707	0.4470074738	0.8118297169	Bacteria	Actinobacteria	Actinobacteria	Bifidobacteriales	Bifidobacteriaceae	Bifidobacterium	Bifidobacterium bifidum
38610743154	0.4740431449	0.6278359468	0.755043013	0.4502231743	0.8140195785	Bacteria	Firmicutes	Clostridia	Clostridiales	Lachnospiraceae	Blautia	Blautia producta
940315970102	0.47173872	0.6352378402	0.7426174735	0.4577133065	0.8157670206	Bacteria	Firmicutes	Clostridia	Clostridiales	Lachnospiraceae	Blautia	Blautia stercoris
763199768316	0.7365175524	0.9837605315	0.748675647	0.4540527253	0.8157670206	Bacteria	Firmicutes	Clostridia	Clostridiales	Ruminococcaceae	Acetanaerobacterium	Acetanaerobacterium elongatum
66184363729	11104473803	14937399666	0.7434007291	0.457239103	0.8157670206	Bacteria	Firmicutes	Erysipelotrichia	Erysipelotrichales	Erysipelotrichaceae	Coprobacillus	Coprobacillus cateniformis
10435986197	-13128981978	17739758715	-0.7400879679	0.459246619	0.8157670206	Bacteria	Firmicutes	Bacilli	Lactobacillales	Streptococcaceae	Streptococcus	Streptococcus porcorum
437212163766	0.4199124309	0.5714323	0.7348419593	0.4624357497	0.8178448848	Bacteria	Bacteroidetes	Bacteroidia	Bacteroidales	Bacteroidaceae	Bacteroides	Bacteroides kribbi
14875597022021	0.4606280993	0.6620570893	0.6957528388	0.4865836287	0.8208664112	Bacteria	Actinobacteria	Coriobacteriia	Coriobacteriales	Coriobacteriaceae	Collinsella	Collinsella aerofaciens
14348184018464	0.5704482363	0.8153242716	0.6996581068	0.484140845	0.8208664112	Bacteria	Firmicutes	Clostridia	Clostridiales	Ruminococcaceae	Ruminococcus	Ruminococcus bromii
3781227398824	-0.7243419523	10417912322	-0.69528513	0.4868766312	0.8208664112	Bacteria	Firmicutes	Clostridia	Clostridiales	Lachnospiraceae	Coprococcus	Coprococcus eutactus
6642492878232	0.3415444329	0.484833252	0.7044575253	0.4811478925	0.8208664112	Bacteria	Firmicutes	Clostridia	Clostridiales	Unclassified	Unclassified	Unclassified
84370311959	-0.7780762745	11231696744	-0.6927504297	0.4884661854	0.8208664112	Bacteria	Proteobacteria	Gammaproteobacteria	Pasteurellales	Pasteurellaceae	Haemophilus	Haemophilus parainfluenzae
803950275374	-19375803919	2766474658	-0.7003788689	0.4836907292	0.8208664112	Bacteria	Bacteroidetes	Bacteroidia	Bacteroidales	Bacteroidaceae	Bacteroides	Bacteroides coprophilus
1429739996263	0.4792055742	0.6854145412	0.6991470787	0.4844601195	0.8208664112	Bacteria	Firmicutes	Clostridia	Clostridiales	Ruminococcaceae	Sporobacter	Sporobacter termitidis
1485952614	0.6148034691	0.8674899264	0.7087153988	0.478501107	0.8208664112	Bacteria	Actinobacteria	Actinobacteria	Bifidobacteriales	Bifidobacteriaceae	Bifidobacterium	Bifidobacterium dentium
58751730798	0.8911036138	12699898156	0.7016620156	0.4828899667	0.8208664112	Bacteria	Firmicutes	Erysipelotrichia	Erysipelotrichales	Erysipelotrichaceae	Solobacterium	Solobacterium moorei
262275539922	0.5598735589	0.7686544015	0.7283813868	0.4663801541	0.8208664112	Bacteria	Firmicutes	Clostridia	Clostridiales	Lachnospiraceae	Lachnoclostridium	xylanolyticum
77587645498	-0.6014343863	0.8397777717	-0.7161827885	0.4738784893	0.8208664112	Bacteria	Firmicutes	Clostridia	Clostridiales	Ruminococcaceae	Anaerotruncus	Anaerotruncus colihominis
0.9128539027	12430390956	17595898059	0.706436859	0.4799165058	0.8208664112	Bacteria	Firmicutes	Bacilli	Lactobacillales	Streptococcaceae	Streptococcus	Streptococcus pharyngis
203385981608	0.5713316662	0.8363270884	0.6831438013	0.4945159801	0.8275990575	Bacteria	Firmicutes	Erysipelotrichia	Erysipelotrichales	Erysipelotrichaceae	Longibaculum	Longibaculum muris
1452918569177	0.4041796074	0.6033560313	0.6698857498	0.5029306246	0.8276376825	Bacteria	Firmicutes	Clostridia	Clostridiales	Lachnospiraceae	Dorea	Dorea formicigenerans
712750830235	-0.6162784264	0.9239224289	-0.6670239915	0.5047568088	0.8276376825	Bacteria	Firmicutes	Clostridia	Clostridiales	Lachnospiraceae	Lachnospira	Lachnospira pectinoschiza
435735740504	0.7207588993	10794242596	0.6677253109	0.5043089502	0.8276376825	Bacteria	Bacteroidetes	Bacteroidia	Bacteroidales	Barnesiellaceae	Coprobacter	Coprobacter fastidiosus
97106364149	0.5030353358	0.7533950855	0.6676912891	0.5043306716	0.8276376825	Bacteria	Firmicutes	Clostridia	Clostridiales	Ruminococcaceae	Acutalibacter	Acutalibacter muris
48744079253	0.3692812642	0.5500150047	0.6714021636	0.501964367	0.8276376825	Bacteria	Firmicutes	Clostridia	Clostridiales	Lachnospiraceae	Mobilitalea	Mobilitalea sibirica
15875482420505	0.4076726218	0.6194243004	0.6581476083	0.5104432865	0.8335868187	Bacteria	Bacteroidetes	Bacteroidia	Bacteroidales	Bacteroidaceae	Bacteroides	Bacteroides uniformis
58048195393	0.8211354227	12687556804	0.6471974355	0.5175041708	0.83501669	Bacteria	Firmicutes	Bacilli	Lactobacillales	Streptococcaceae	Streptococcus	Streptococcus mutans
279394625699	0.7988422243	12279159416	0.6505675163	0.5153257051	0.83501669	Bacteria	Firmicutes	Clostridia	Clostridiales	Hungateiclostridiaceae	Ruminiclostridium	Ruminiclostridium papyrosolvens
69486552683	-0.530945978	0.8202696381	-0.6472822513	0.5174492864	0.83501669	Bacteria	Actinobacteria	Actinobacteria	Actinomycetales	Actinomycetaceae	Schaalia	Schaalia meyeri
10376964653	-0.5421544351	0.8521724909	-0.6362026948	0.524644317	0.8431783666	Bacteria	Firmicutes	Tissierellia	Tissierellales	Peptoniphilaceae	Peptoniphilus	Peptoniphilus duerdenii
474285581257	0.6474711918	10254200989	0.6314204222	0.5277656663	0.8448422722	Bacteria	Bacteroidetes	Bacteroidia	Bacteroidales	Bacteroidaceae	Bacteroides	Bacteroides salyersiae
340247819422	0.8868292544	14129123561	0.6276604848	0.5302263766	0.8454396949	Bacteria	Firmicutes	Bacilli	Lactobacillales	Enterococcaceae	Enterococcus	Enterococcus hirae
9992546091548	-0.3167306715	0.5116089348	-0.6190874514	0.5358587496	0.8510697788	Bacteria	Firmicutes	Clostridia	Clostridiales	Lachnospiraceae	Anaerobutyricum	Anaerobutyricum hallii
84227633045	-0.9628292565	15832310795	-0.608141963	0.5430933229	0.855297323	Bacteria	Proteobacteria	Betaproteobacteria	Burkholderiales	Sutterellaceae	Duodenibacillus	Duodenibacillus massiliensis
13331985252	0.9628783418	15902567823	0.6054860778	0.5448560724	0.855297323	Bacteria	Proteobacteria	Gammaproteobacteria	Enterobacterales	Enterobacteriaceae	Shigella	Shigella boydii
11013357008	-0.9200465545	15068195177	-0.6105884239	0.5414720883	0.855297323	Bacteria	Firmicutes	Clostridia	Clostridiales	Clostridiaceae	Clostridium	Clostridium oceanicum
60150537062	0.4837831504	0.807181127	0.5993489369	0.5489402207	0.8583814262	Bacteria	Bacteroidetes	Bacteroidia	Bacteroidales	Bacteroidaceae	Bacteroides	Bacteroides timonensis
343971871909	11099175308	18972470795	0.5850147526	0.5585377972	0.8666965818	Bacteria	Actinobacteria	Coriobacteriia	Eggerthellales	Eggerthellaceae	Adlercreutzia	Adlercreutzia muris
16960952214	0.5954271593	10133325569	0.5875930416	0.5568054827	0.8666965818	Bacteria	Firmicutes	Clostridia	Clostridiales	Christensenellaceae	Christensenella	Christensenella timonensis
109811888929	-0.5665539889	0.9840093167	-0.5757607975	0.5647768747	0.8730329551	Bacteria	Firmicutes	Clostridia	Clostridiales	Lachnospiraceae	Lachnobacterium	Lachnobacterium bovis
16330600151	11955625092	21287737796	0.561620272	0.5743747655	0.8759788512	Bacteria	Bacteroidetes	Bacteroidia	Bacteroidales	Prevotellaceae	Prevotella	Prevotella oralis
4104511439259	-0.3626824712	0.6380249229	-0.5684456174	0.5697324227	0.8759788512	Bacteria	Firmicutes	Clostridia	Clostridiales	Lachnospiraceae	Roseburia	Roseburia faecis
1484056157525	0.5983035076	1067993173	0.5602128578	0.5753342578	0.8759788512	Bacteria	Firmicutes	Clostridia	Clostridiales	Peptostreptococcaceae	Romboutsia	Romboutsia timonensis
1026574566	0.4396488243	0.7843325129	0.5605388238	0.575111966	0.8759788512	Bacteria	Firmicutes	Erysipelotrichia	Erysipelotrichales	Erysipelotrichaceae	Holdemania	Holdemania filiformis
539335388628	14634463581	2647193374	0.5528294126	0.580380226	0.8803520283	Bacteria	Bacteroidetes	Bacteroidia	Bacteroidales	Porphyromonadaceae	Porphyromonas	Porphyromonas pogonae
5444129483923	-0.2212282089	0.4086372142	-0.5413804744	0.5882453627	0.882368044	Bacteria	Firmicutes	Clostridia	Clostridiales	Lachnospiraceae	Dorea	Dorea longicatena
3740037750725	-0.4084404968	0.7519521397	-0.5431735283	0.587010331	0.882368044	Bacteria	Firmicutes	Clostridia	Clostridiales	Eubacteriaceae	Eubacterium	Eubacterium coprostanoligenes
233497927936	0.703764303	12958777376	0.5430792447	0.5870752423	0.882368044	Bacteria	Firmicutes	Clostridia	Clostridiales	Hungateiclostridiaceae	Anaerobacterium	Anaerobacterium chartisolvens
2237194386081	0.3091042663	0.6527694891	0.4735274418	0.6358369276	0.9039206887	Bacteria	Firmicutes	Clostridia	Clostridiales	Lachnospiraceae	Coprococcus	Coprococcus comes
3452960809527	0.3222054623	0.675107091	0.4772657058	0.6331729281	0.9039206887	Bacteria	Bacteroidetes	Bacteroidia	Bacteroidales	Bacteroidaceae	Bacteroides	Bacteroides caccae
588127621506	0.6761012564	13313569931	0.507828674	0.6115734989	0.9039206887	Bacteria	Actinobacteria	Coriobacteriia	Eggerthellales	Eggerthellaceae	Slackia	Slackia isoflavoniconvertens
675127190805	-0.4810346679	0.9542224808	-0.5041116486	0.6141829217	0.9039206887	Bacteria	Bacteroidetes	Bacteroidia	Bacteroidales	Tannerellaceae	Parabacteroides	Parabacteroides johnsonii
211591023472	0.2727782046	0.5709595106	0.4777540256	0.6328252868	0.9039206887	Bacteria	Firmicutes	Clostridia	Clostridiales	Lachnospiraceae	Roseburia	Roseburia hominis
59719223568	0.3068295682	0.6539114131	0.4692219192	0.6389110195	0.9039206887	Bacteria	Firmicutes	Clostridia	Clostridiales	Lachnospiraceae	Blautia	Blautia hydrogenotrophica
84909807869	0.7970868063	16703507682	0.4771972579	0.6332216636	0.9039206887	Bacteria	Firmicutes	Negativicutes	Veillonellales	Veillonellaceae	Allisonella	Allisonella histaminiformans
122464149023	-0.2756632644	0.5903847797	-0.4669213602	0.6405561424	0.9039206887	Bacteria	Firmicutes	Clostridia	Clostridiales	Lachnospiraceae	Eisenbergiella	Eisenbergiella tayi
18568768715	0.5951187565	12735134272	0.4673046579	0.6402819244	0.9039206887	Bacteria	Firmicutes	Clostridia	Clostridiales	Clostridiaceae	Fonticella	Fonticella tunisiensis
767229722741	0.4939997238	1031811112	0.4787695325	0.6321025937	0.9039206887	Bacteria	Proteobacteria	Gammaproteobacteria	Enterobacterales	Enterobacteriaceae	Escherichia	Escherichia marmotae
197941247532	-0.2666224396	0.5624863118	-0.4740069829	0.6354949277	0.9039206887	Bacteria	Firmicutes	Clostridia	Clostridiales	Ruminococcaceae	Anaeromassilibacillus	Anaeromassilibacillus senegalensis
23555501537	10537194767	21599233838	0.4878503954	0.6256558125	0.9039206887	Bacteria	Bacteroidetes	Bacteroidia	Bacteroidales	Porphyromonadaceae	Porphyromonas	Porphyromonas gulae
27413622931	0.646046927	12823768546	0.5037886677	0.614409892	0.9039206887	Bacteria	Firmicutes	Clostridia	Clostridiales	Clostridiaceae	Caloramator	Caloramator mitchellensis
22034058712	-0.2437172592	0.5100472556	-0.4778327037	0.6327692823	0.9039206887	Bacteria	Firmicutes	Clostridia	Clostridiales	Lachnospiraceae	Muricomes	Muricomes intestini
50482967859	0.3836138519	0.7768577883	0.4938019	0.6214460912	0.9039206887	Bacteria	Firmicutes	Clostridia	Clostridiales	Ruminococcaceae	Anaerofilum	Anaerofilum pentosovorans
15282691138	0.5076965794	1039054388	0.4886140565	0.6251149595	0.9039206887	Bacteria	Firmicutes	Clostridia	Clostridiales	Peptococcaceae	Desulfosporosinus	Desulfosporosinus fructosivorans
12432256035	-0.5722849878	12006403705	-0.4766497961	0.6336115179	0.9039206887	Bacteria	Firmicutes	Clostridia	Clostridiales	Lachnospiraceae	Anaerocolumna	Anaerocolumna cellulosilytica
884745641669	-0.378807839	0.8200330865	-0.4619421402	0.6441228134	0.9057977063	Bacteria	Firmicutes	Clostridia	Clostridiales	Ruminococcaceae	Neglecta	Neglecta timonensis
50827972924	0.597006714	14602066209	0.4088508472	0.6826491223	0.9077364334	Bacteria	Bacteroidetes	Bacteroidia	Bacteroidales	Bacteroidaceae	Bacteroides	Bacteroides coprocola
9554979335855	0.4881891515	11436779566	0.4268589323	0.6694820792	0.9077364334	Bacteria	Firmicutes	Negativicutes	Acidaminococcales	Acidaminococcaceae	Phascolarctobacterium	Phascolarctobacterium faecium
1318569488618	0.7157962256	17966319719	0.3984100455	0.6903279543	0.9077364334	Bacteria	Firmicutes	Negativicutes	Acidaminococcales	Acidaminococcaceae	Phascolarctobacterium	Phascolarctobacterium succinatutens
995710861188	-0.7723693225	17758669731	-0.4349252136	0.6636167125	0.9077364334	Bacteria	Bacteroidetes	Bacteroidia	Bacteroidales	Prevotellaceae	Massiliprevotella	Massiliprevotella massiliensis
1767191752369	-0.252631263	0.5753854055	-0.4390644263	0.6606148544	0.9077364334	Bacteria	Bacteroidetes	Bacteroidia	Bacteroidales	Bacteroidaceae	Bacteroides	Bacteroides thetaiotaomicron
1184595200399	0.6110025617	15126310294	0.4039336426	0.6862615162	0.9077364334	Bacteria	Actinobacteria	Coriobacteriia	Coriobacteriales	Coriobacteriaceae	Senegalimassilia	Senegalimassilia anaerobia
18616169759	0.34717858	0.8682704156	0.3998507536	0.689266446	0.9077364334	Bacteria	Firmicutes	Negativicutes	Veillonellales	Veillonellaceae	Veillonella	Veillonella atypica
11478904065	0.4889654124	11501096273	0.4251467867	0.6707296729	0.9077364334	Bacteria	Firmicutes	Clostridia	Clostridiales	Lachnospiraceae	Frisingicoccus	Frisingicoccus caecimuris
136787591327	-0.2395899858	0.5338332285	-0.4488105516	0.6535683264	0.9077364334	Bacteria	Firmicutes	Clostridia	Clostridiales	Lachnospiraceae	Anaerotignum	Anaerotignum aminivorans
45756822367	0.474183193	11248415477	0.4215555462	0.6733494593	0.9077364334	Bacteria	Proteobacteria	Betaproteobacteria	Burkholderiales	Oxalobacteraceae	Oxalobacter	Oxalobacter formigenes
96580405021	-0.4599058057	11331625014	-0.4058604173	0.6848451633	0.9077364334	Bacteria	Firmicutes	Clostridia	Clostridiales	Clostridiaceae	Butyricicoccus	Butyricicoccus pullicaecorum
14339424344	-0.7125326484	17340185276	-0.4109140918	0.6811355291	0.9077364334	Bacteria	Proteobacteria	Alphaproteobacteria	Kiloniellales	Kiloniellaceae	Kiloniella	Kiloniella antarctica
11259446305	10495651514	26293926059	0.3991663889	0.6897706073	0.9077364334	Bacteria	Proteobacteria	Gammaproteobacteria	Enterobacterales	Enterobacteriaceae	Enterobacter	Enterobacter kobei
17895176304	0.7585441008	17648493819	0.4298067068	0.6673362538	0.9077364334	Bacteria	Firmicutes	Bacilli	Lactobacillales	Lactobacillaceae	Lactobacillus	Lactobacillus caviae
14604678846	-0.3811144678	0.9316074806	-0.4090933959	0.6824711226	0.9077364334	Bacteria	Firmicutes	Clostridia	Clostridiales	Eubacteriaceae	Anaerofustis	Anaerofustis stercorihominis
21929130343	-0.3990068333	0.9882416056	-0.403754336	0.6863933789	0.9077364334	Bacteria	Firmicutes	Clostridia	Clostridiales	Catabacteriaceae	Catabacter	Catabacter hongkongensis
10278501806	10217907494	25633420589	0.3986166208	0.6901757129	0.9077364334	Bacteria	Firmicutes	Clostridia	Clostridiales	Peptococcaceae	Peptococcus	Peptococcus simiae
17537323574	0.4183634446	10065585415	0.415637469	0.6776753045	0.9077364334	Bacteria	Bacteroidetes	Bacteroidia	Bacteroidales	Bacteroidaceae	Bacteroides	Bacteroides sartorii
13188449523	-0.9425015303	23547107881	-0.4002621193	0.6889634655	0.9077364334	Bacteria	Proteobacteria	Alphaproteobacteria	Rhodospirillales	Acetobacteraceae	Gluconacetobacter	Gluconacetobacter tumulisoli
0.9705802964	-0.7370907632	17614930248	-0.4184465978	0.6756206232	0.9077364334	Bacteria	Proteobacteria	Gammaproteobacteria	Enterobacterales	Enterobacteriaceae	Salmonella	Salmonella enterica;Salmonella enterica subsp. indica
1437319240792	0.1954509153	0.508700777	0.3842158772	0.7008184515	0.9126210297	Bacteria	Firmicutes	Clostridia	Clostridiales	Lachnospiraceae	Murimonas	Murimonas intestini
1137181700995	0.240960708	0.6268290064	0.384412185	0.7006729707	0.9126210297	Bacteria	Bacteroidetes	Bacteroidia	Bacteroidales	Odoribacteraceae	Odoribacter	Odoribacter splanchnicus
18077229811	0.4258284513	11260450303	0.3781628975	0.7053095859	0.9126210297	Bacteria	Bacteroidetes	Bacteroidia	Bacteroidales	Prevotellaceae	Prevotella	Prevotella stercorea
690237430183	0.8685511417	22587278389	0.3845311183	0.7005848364	0.9126210297	Bacteria	Firmicutes	Clostridia	Clostridiales	Lachnospiraceae	Tyzzerella	colinum
160653719692	0.2119359161	0.5602254561	0.3783046875	0.7052042636	0.9126210297	Bacteria	Firmicutes	Clostridia	Clostridiales	Lachnospiraceae	Lachnoclostridium	clostridioforme
48043539433744	0.1910687374	0.5456652871	0.3501573985	0.7262205764	0.920490607	Bacteria	Firmicutes	Clostridia	Clostridiales	Ruminococcaceae	Faecalibacterium	Faecalibacterium prausnitzii
1256189891007	0.1765755813	0.506356741	0.3487177458	0.7273012204	0.920490607	Bacteria	Firmicutes	Clostridia	Clostridiales	Ruminococcaceae	Agathobaculum	Agathobaculum butyriciproducens
103335422845	-0.3275569261	0.9336316956	-0.3508416944	0.7257071153	0.920490607	Bacteria	Firmicutes	Bacilli	Lactobacillales	Lactobacillaceae	Lactobacillus	Lactobacillus rogosae
367735933067	0.1834853824	0.5208146316	0.3523045845	0.7246098503	0.920490607	Bacteria	Firmicutes	Clostridia	Clostridiales	Lachnospiraceae	Hespellia	Hespellia porcina
6364366066	0.8657178254	24278543177	0.3565773363	0.7214082466	0.920490607	Bacteria	Proteobacteria	Alphaproteobacteria	Rhodospirillales	Rhodospirillaceae	Aestuariispira	Aestuariispira insulae
40707085038	-0.2747481917	0.773369742	-0.3552611083	0.7223939886	0.920490607	Bacteria	Actinobacteria	Actinobacteria	Bifidobacteriales	Bifidobacteriaceae	Bifidobacterium	Bifidobacterium saguini
0.923712848	0.752716225	21263004314	0.3540027617	0.7233368135	0.920490607	Bacteria	Bacteroidetes	Bacteroidia	Bacteroidales	Prevotellaceae	Prevotella	Prevotella corporis
52124990508	0.2343680392	0.6807581448	0.3442750425	0.7306394516	0.9218348221	Bacteria	Firmicutes	Clostridia	Clostridiales	Ruminococcaceae	Harryflintia	Harryflintia acetispora
745186078573	0.2273175016	0.6874168858	0.3306836161	0.7408834791	0.9234162628	Bacteria	Firmicutes	Clostridia	Clostridiales	Lachnospiraceae	Coprococcus	Coprococcus catus
170888510188	0.3717663674	11231525986	0.3310025439	0.740642564	0.9234162628	Bacteria	Lentisphaerae	Lentisphaeria	Victivallales	Victivallaceae	Victivallis	Victivallis vadensis
34457312947	0.2189155995	0.6623527509	0.3305121013	0.7410130504	0.9234162628	Bacteria	Bacteroidetes	Bacteroidia	Bacteroidales	Bacteroidaceae	Bacteroides	Bacteroides paurosaccharolyticus
14326411476	-0.3982642681	11805144847	-0.3373649992	0.7358417663	0.9234162628	Bacteria	Firmicutes	Bacilli	Bacillales	Thermoactinomycetaceae	Kroppenstedtia	Kroppenstedtia pulmonis
1131358121689	0.3614294523	11217552339	0.322199925	0.7473012413	0.9283957138	Bacteria	Firmicutes	Clostridia	Clostridiales	Ruminococcaceae	Ruminococcus	Ruminococcus callidus
870783649924	-0.186403346	0.5985732742	-0.3114127443	0.7554868667	0.9328420153	Bacteria	Bacteroidetes	Bacteroidia	Bacteroidales	Bacteroidaceae	Bacteroides	Bacteroides xylanisolvens
11669056517	0.2619404886	0.8340386729	0.3140627613	0.7534733718	0.9328420153	Bacteria	Firmicutes	Clostridia	Clostridiales	Lachnospiraceae	Lachnospira	Lachnospira multipara
1680753362182	-0.2147770934	0.7277139544	-0.2951394461	0.7678873575	0.9367300596	Bacteria	Firmicutes	Clostridia	Clostridiales	Lachnospiraceae	Lachnoclostridium	Lachnoclostridium pacaense
1317363790574	0.2497213506	0.8458543386	0.2952297331	0.76781839	0.9367300596	Bacteria	Firmicutes	Clostridia	Clostridiales	Christensenellaceae	Christensenella	Christensenella massiliensis
31914212824	0.3897856794	13116434842	0.2971734957	0.7663340557	0.9367300596	Bacteria	Bacteroidetes	Bacteroidia	Bacteroidales	Tannerellaceae	Parabacteroides	Parabacteroides gordonii
77016530731	0.2994605499	0.9901625491	0.3024357468	0.7623199078	0.9367300596	Bacteria	Actinobacteria	Coriobacteriia	Coriobacteriales	Atopobiaceae	Atopobium	Atopobium parvulum
35256809847	-0.4926254159	1735898277	-0.2837870297	0.7765735949	0.9444813991	Bacteria	Firmicutes	Negativicutes	Acidaminococcales	Acidaminococcaceae	Acidaminococcus	Acidaminococcus fermentans
2823574796719	0.3325992322	12859003763	0.2586508554	0.7959046411	0.9487401892	Bacteria	Bacteroidetes	Bacteroidia	Bacteroidales	Prevotellaceae	Prevotella	Prevotella copri
13574597989571	0.2012248141	10356398112	0.1942999988	0.8459409866	0.9487401892	Bacteria	Proteobacteria	Gammaproteobacteria	Enterobacterales	Enterobacteriaceae	Escherichia	Escherichia fergusonii
3324105587985	0.135750223	0.6318944241	0.2148305443	0.829899438	0.9487401892	Bacteria	Firmicutes	Clostridia	Clostridiales	Lachnospiraceae	Fusicatenibacter	Fusicatenibacter saccharivorans
2895506245166	0.3394249728	17138166997	0.1980520862	0.8430043118	0.9487401892	Bacteria	Firmicutes	Erysipelotrichia	Erysipelotrichales	Erysipelotrichaceae	Catenibacterium	Catenibacterium mitsuokai
210012059663	0.0875877178	0.4651944999	0.1882819291	0.8506556505	0.9487401892	Bacteria	Firmicutes	Clostridia	Clostridiales	Lachnospiraceae	Blautia	Blautia faecis
501074815036	0.2126894377	11135299452	0.1910046861	0.8485219218	0.9487401892	Bacteria	Bacteroidetes	Bacteroidia	Bacteroidales	Bacteroidaceae	Bacteroides	Bacteroides fragilis
114174833273	0.4431579077	22939870248	0.1931823951	0.8468161258	0.9487401892	Bacteria	Firmicutes	Bacilli	Lactobacillales	Lactobacillaceae	Lactobacillus	Lactobacillus ruminis
66219350661	0.267201535	11714439974	0.2280958677	0.8195717125	0.9487401892	Bacteria	Firmicutes	Bacilli	Lactobacillales	Lactobacillaceae	Lactobacillus	Lactobacillus gasseri
910231259731	0.1024884119	0.6392561449	0.1603244846	0.8726254724	0.9487401892	Bacteria	Firmicutes	Clostridia	Clostridiales	Hungateiclostridiaceae	Hungateiclostridium	Hungateiclostridium thermocellum
1261661256972	0.2692064005	11093893676	0.2426617817	0.8082674164	0.9487401892	Bacteria	Firmicutes	Clostridia	Clostridiales	Gracilibacteraceae	Gracilibacter	Gracilibacter thermotolerans
126491721932	-0.3741145641	21315331711	-0.1755143055	0.8606755311	0.9487401892	Bacteria	Proteobacteria	Betaproteobacteria	Burkholderiales	Sutterellaceae	Sutterella	Sutterella massiliensis
905219726304	0.1757474679	0.7769762058	0.2261941441	0.8210504249	0.9487401892	Bacteria	Bacteroidetes	Bacteroidia	Bacteroidales	Rikenellaceae	Alistipes	Alistipes shahii
3097375402247	-0.0752870593	0.3551071065	-0.2120122575	0.8320974716	0.9487401892	Bacteria	Firmicutes	Clostridia	Clostridiales	Lachnospiraceae	Kineothrix	Kineothrix alysoides
283141397957	0.0866275124	0.5642920924	0.1535153754	0.8779918662	0.9487401892	Bacteria	Firmicutes	Clostridia	Clostridiales	Lachnospiraceae	Faecalimonas	Faecalimonas umbilicata
667647028127	-0.1311387133	0.909556845	-0.1441786888	0.885359369	0.9487401892	Bacteria	Firmicutes	Clostridia	Clostridiales	Clostridiaceae	Anoxynatronum	Anoxynatronum buryatiense
114596811905	-0.1451458827	0.806549255	-0.1799591058	0.8571846728	0.9487401892	Bacteria	Firmicutes	Negativicutes	Veillonellales	Veillonellaceae	Veillonella	Veillonella dispar
2699807557035	0.2378067474	12613003969	0.1885409281	0.8504526348	0.9487401892	Bacteria	Firmicutes	Clostridia	Clostridiales	Vallitaleaceae	Vallitalea	Vallitalea pronyensis
115997975611	-0.1892979736	10070058768	-0.1879810019	0.850891544	0.9487401892	Bacteria	Firmicutes	Bacilli	Lactobacillales	Streptococcaceae	Streptococcus	Streptococcus anginosus;Streptococcus anginosus subsp. whileyi
574275884607	0.2569556146	12320034819	0.2085672796	0.8347860559	0.9487401892	Bacteria	Firmicutes	Clostridia	Clostridiales	Peptostreptococcaceae	Intestinibacter	Intestinibacter bartlettii
84643053709	-0.3222810138	16823140082	-0.1915700709	0.8480789882	0.9487401892	Bacteria	Proteobacteria	Deltaproteobacteria	Desulfovibrionales	Desulfovibrionaceae	Desulfovibrio	Desulfovibrio desulfuricans
186735472915	-0.4110878326	26220819103	-0.1567791727	0.8754188876	0.9487401892	Bacteria	Proteobacteria	Deltaproteobacteria	Desulfovibrionales	Desulfovibrionaceae	Desulfovibrio	Desulfovibrio piger
8843899584	0.2722028445	0.9965723907	0.2731390585	0.7847463235	0.9487401892	Bacteria	Firmicutes	Clostridia	Clostridiales	Lachnospiraceae	Tyzzerella	Tyzzerella nexilis
33354459925	-0.3510797102	15643429967	-0.2244262997	0.8224256084	0.9487401892	Bacteria	Firmicutes	Erysipelotrichia	Erysipelotrichales	Erysipelotrichaceae	Massilimicrobiota	Massilimicrobiota timonensis
25535770861	-0.4493116763	2405919045	-0.1867526163	0.8518545999	0.9487401892	Bacteria	Proteobacteria	Gammaproteobacteria	Enterobacterales	Enterobacteriaceae	Citrobacter	Citrobacter freundii
78137287812	0.4018814693	26348874625	0.1525232007	0.878774293	0.9487401892	Bacteria	Actinobacteria	Coriobacteriia	Coriobacteriales	Atopobiaceae	Olsenella	Olsenella scatoligenes
207460678416	0.2364239735	0.9676483362	0.2443284039	0.8069764868	0.9487401892	Bacteria	Proteobacteria	Deltaproteobacteria	Desulfovibrionales	Desulfovibrionaceae	Desulfovibrio	Desulfovibrio intestinalis
246510445292	-0.1135499673	0.7870917464	-0.1442652242	0.8852910381	0.9487401892	Bacteria	Firmicutes	Clostridia	Clostridiales	Hungateiclostridiaceae	Ruminiclostridium	Ruminiclostridium cellobioparum
46086949239	0.2947900205	1184757486	0.2488188714	0.8035008928	0.9487401892	Bacteria	Firmicutes	Negativicutes	Veillonellales	Veillonellaceae	Veillonella	Veillonella rogosae
62639963782	0.4059420577	19409363998	0.2091475319	0.83433307	0.9487401892	Bacteria	Firmicutes	Bacilli	Lactobacillales	Enterococcaceae	Enterococcus	Enterococcus faecalis
109589908535	0.1191324099	0.6755934851	0.1763374167	0.8600288683	0.9487401892	Bacteria	Firmicutes	Erysipelotrichia	Erysipelotrichales	Erysipelotrichaceae	Erysipelatoclostridium	saccharogumia
69138217434	-0.1459609256	0.804800581	-0.1813628482	0.8560827781	0.9487401892	Bacteria	Actinobacteria	Actinobacteria	Bifidobacteriales	Bifidobacteriaceae	Bifidobacterium	Bifidobacterium breve
12976431935	0.7006046285	26749603378	0.2619121557	0.7933891678	0.9487401892	Bacteria	Firmicutes	Bacilli	Lactobacillales	Lactobacillaceae	Lactobacillus	Lactobacillus oris
34229933581	0.0899603724	0.5894545432	0.1526163017	0.8787008687	0.9487401892	Bacteria	Firmicutes	Clostridia	Clostridiales	Lachnospiraceae	Pseudobutyrivibrio	Pseudobutyrivibrio ruminis
0.9172074218	-0.4146397136	28696869916	-0.1444895261	0.8851139266	0.9487401892	Bacteria	Bacteroidetes	Bacteroidia	Bacteroidales	Porphyromonadaceae	Gabonibacter	Gabonibacter massiliensis
11604856665	-0.0730630727	0.3590313217	-0.2035005534	0.8387438132	0.9487401892	Bacteria	Firmicutes	Clostridia	Clostridiales	Lachnospiraceae	Blautia	Blautia glucerasea
87504509913	0.1799662856	0.7473136527	0.2408176071	0.8096964827	0.9487401892	Bacteria	Firmicutes	Clostridia	Clostridiales	Ruminococcaceae	Fournierella	Fournierella massiliensis
22870802669	-0.1497305407	0.7224194226	-0.2072626178	0.8358047669	0.9487401892	Bacteria	Firmicutes	Clostridia	Clostridiales	Ruminococcaceae	Phocea	Phocea massiliensis
14470590005	0.1418005639	0.7454251368	0.1902277733	0.8491306485	0.9487401892	Bacteria	Bacteroidetes	Bacteroidia	Bacteroidales	Bacteroidaceae	Bacteroides	Bacteroides barnesiae
121606297784	-0.1038590498	0.7211823482	-0.1440121906	0.8854908433	0.9487401892	Bacteria	Firmicutes	Clostridia	Clostridiales	Hungateiclostridiaceae	Ruminiclostridium	Ruminiclostridium cellulolyticum
27709378604	0.238301855	1347521001	0.1768446316	0.8596304306	0.9487401892	Bacteria	Proteobacteria	Gammaproteobacteria	Enterobacterales	Enterobacteriaceae	Kosakonia	Kosakonia sacchari
13510353538	0.1544173048	0.853118766	0.1810032916	0.8563649924	0.9487401892	Bacteria	Actinobacteria	Actinobacteria	Actinomycetales	Actinomycetaceae	Actinomyces	Actinomyces graevenitzii
16841776705	0.1297324931	0.7580001173	0.1711510198	0.8641050196	0.9487401892	Bacteria	Firmicutes	Clostridia	Clostridiales	Hungateiclostridiaceae	Hungateiclostridium	Hungateiclostridium clariflavum
10102113819	0.4923665753	18250166693	0.2697874401	0.787323786	0.9487401892	Bacteria	Proteobacteria	Gammaproteobacteria	Enterobacterales	Erwiniaceae	Pantoea	Pantoea beijingensis
13968345797	-0.1706862694	0.7759631988	-0.2199669645	0.8258968831	0.9487401892	Bacteria	Bacteroidetes	Bacteroidia	Bacteroidales	Bacteroidaceae	Bacteroides	Bacteroides acidifaciens
14781899188	0.1511554706	0.9094463637	0.1662060311	0.8679948134	0.9487401892	Bacteria	Actinobacteria	Coriobacteriia	Eggerthellales	Eggerthellaceae	Raoultibacter	Raoultibacter massiliensis
32052144586	-0.1774019364	15311871255	-0.1158590831	0.9077642242	0.9599073389	Bacteria	Actinobacteria	Coriobacteriia	Coriobacteriales	Coriobacteriaceae	Collinsella	Collinsella bouchesdurhonensis
202657641344	-0.0722884133	0.5700238608	-0.126816469	0.8990856606	0.9599073389	Bacteria	Firmicutes	Clostridia	Clostridiales	Lachnospiraceae	Faecalicatena	Faecalicatena orotica
11852663689	-0.1340238775	11154980101	-0.1201471238	0.9043666033	0.9599073389	Bacteria	Firmicutes	Negativicutes	Veillonellales	Veillonellaceae	Veillonella	Veillonella parvula
44257533082	0.0762395136	0.620141273	0.1229389446	0.9021554462	0.9599073389	Bacteria	Firmicutes	Clostridia	Clostridiales	Lachnospiraceae	Lachnoanaerobaculum	Lachnoanaerobaculum orale
13892924336	-0.177827815	15223903542	-0.1168082907	0.9070119737	0.9599073389	Bacteria	Firmicutes	Bacilli	Lactobacillales	Streptococcaceae	Streptococcus	Streptococcus hongkongensis
15715248268	-0.0727593165	0.6885201165	-0.105674932	0.9158402703	0.9659252851	Bacteria	Proteobacteria	Deltaproteobacteria	Desulfovibrionales	Desulfovibrionaceae	Desulfovibrio	Desulfovibrio alaskensis
60850123857	-0.0757963536	0.7665017922	-0.0988860749	0.9212287254	0.9683128599	Bacteria	Firmicutes	Clostridia	Clostridiales	Clostridiaceae	Hungatella	Hungatella effluvii
41739734344	0.1344697794	13891616894	0.0967992282	0.9228858368	0.9683128599	Bacteria	Proteobacteria	Gammaproteobacteria	Enterobacterales	Erwiniaceae	Erwinia	Erwinia iniecta
747825108195	-0.0477882219	0.5631008126	-0.0848661924	0.9323677693	0.9713899694	Bacteria	Bacteroidetes	Bacteroidia	Bacteroidales	Bacteroidaceae	Bacteroides	Bacteroides ovatus
151559782786	0.1235398802	15424674761	0.0800923729	0.9361637888	0.9713899694	Bacteria	Actinobacteria	Coriobacteriia	Eggerthellales	Eggerthellaceae	Gordonibacter	Gordonibacter urolithinfaciens
11645074228	-0.0541404609	0.8058603337	-0.0671834295	0.9464356767	0.9713899694	Bacteria	Bacteroidetes	Bacteroidia	Bacteroidales	Rikenellaceae	Alistipes	Alistipes ihumii
83235213473	0.0372073255	0.644053619	0.0577705402	0.9539314045	0.9713899694	Bacteria	Firmicutes	Clostridia	Clostridiales	Lachnospiraceae	Anaerobium	Anaerobium acetethylicum
8787057422	0.0446388703	0.6001818342	0.0743755771	0.9407115416	0.9713899694	Bacteria	Bacteroidetes	Bacteroidia	Bacteroidales	Bacteroidaceae	Bacteroides	Bacteroides caecimuris
35098535859	0.0985783444	17315542001	0.0569305566	0.9546005131	0.9713899694	Bacteria	Bacteroidetes	Bacteroidia	Bacteroidales	Prevotellaceae	Prevotella	Prevotella histicola
59899805084	-0.0449638009	0.7303673943	-0.0615632643	0.9509106323	0.9713899694	Bacteria	Bacteroidetes	Bacteroidia	Bacteroidales	Bacteroidaceae	Bacteroides	Bacteroides rodentium
11489211432	-0.1312031048	14900584873	-0.0880523187	0.9298350933	0.9713899694	Bacteria	Firmicutes	Clostridia	Clostridiales	Defluviitaleaceae	Defluviitalea	Defluviitalea raffinosedens
0.9399196581	-0.0919813857	16050579579	-0.0573072052	0.9543004809	0.9713899694	Bacteria	Firmicutes	Bacilli	Lactobacillales	Streptococcaceae	Streptococcus	Streptococcus intermedius
13225677108	-0.0439206555	0.7076427501	-0.0620661421	0.9505101597	0.9713899694	Bacteria	Firmicutes	Clostridia	Clostridiales	Lachnospiraceae	Bariatricus	Bariatricus massiliensis
4515851149	0.0565889954	0.7285078964	0.0776779438	0.9380842394	0.9713899694	Bacteria	Firmicutes	Clostridia	Clostridiales	Ruminococcaceae	Hydrogenoanaerobacterium	Hydrogenoanaerobacterium saccharovorans
0.8958768888	0.0831148944	10610157325	0.0783352139	0.9375614068	0.9713899694	Bacteria	Firmicutes	Bacilli	Bacillales	Thermoactinomycetaceae	Novibacillus	Novibacillus thermophilus
38524132252	0.0628325213	12413673184	0.0506155755	0.9596318513	0.9740624054	Bacteria	Firmicutes	Bacilli	Lactobacillales	Streptococcaceae	Streptococcus	Streptococcus anginosus
18357397721	-0.0332175888	0.7058724229	-0.0470589128	0.9624662739	0.9744971023	Bacteria	Firmicutes	Clostridia	Clostridiales	Eubacteriaceae	Eubacterium	Eubacterium oxidoreducens
181871155524	-0.043490055	10639746608	-0.0408750853	0.9673954799	0.9770453101	Bacteria	Proteobacteria	Gammaproteobacteria	Enterobacterales	Enterobacteriaceae	Shigella	Shigella dysenteriae
844459272595	-0.0214661977	0.8256321099	-0.0259997127	0.9792575676	0.9865654599	Bacteria	Firmicutes	Clostridia	Clostridiales	Eubacteriaceae	Eubacterium	Eubacterium ramulus
46018601468	0.0100022915	0.7870850651	0.0127080184	0.9898607413	0.9947732015	Bacteria	Firmicutes	Bacilli	Bacillales	Unclassified	Unclassified	Unclassified
7537826382938	-0.0021100297	0.9403167756	-0.0022439562	0.9982095835	0.9983818903	Bacteria	Actinobacteria	Actinobacteria	Bifidobacteriales	Bifidobacteriaceae	Bifidobacterium	Bifidobacterium adolescentis
10466000316	0.0021151087	10429524233	0.0020280011	0.9983818903	0.9983818903	Bacteria	Actinobacteria	Actinobacteria	Micrococcales	Micrococcaceae	Rothia	Rothia dentocariosa
0.5830657969	0.3283317525	11942669069	0.2749232609	0.7833751958		Bacteria	Proteobacteria	Gammaproteobacteria	Aeromonadales	Succinivibrionaceae	Succinivibrio	Succinivibrio dextrinosolvens
0.4998971308	0.6394029895	17114818125	0.3735961345	0.7087048102		Bacteria	Firmicutes	Erysipelotrichia	Erysipelotrichales	Erysipelotrichaceae	Faecalitalea	Faecalitalea cylindroides
0.0961792076	0.5224613927	16257874034	0.3213589868	0.7479383599		Bacteria	Firmicutes	Clostridia	Clostridiales	Peptostreptococcaceae	Unclassified	Unclassified
0.2356253353	0.3382862125	24213451541	0.1397100334	0.8888890986		Bacteria	Fusobacteria	Fusobacteriia	Fusobacteriales	Fusobacteriaceae	Fusobacterium	Fusobacterium mortiferum
0.0073886537	-0.3971263813	34055619997	-0.1166111148	0.9071682295		Bacteria	Firmicutes	Bacilli	Lactobacillales	Lactobacillaceae	Lactobacillus	Lactobacillus pontis
0.2846357625	-0.0651434117	34039237241	-0.0191377413	0.9847312237		Bacteria	Firmicutes	Bacilli	Lactobacillales	Lactobacillaceae	Lactobacillus	Lactobacillus ultunensis
0.1785837147	0.4754345654	25318559805	0.1877810464	0.8510482942		Bacteria	Firmicutes	Negativicutes	Veillonellales	Veillonellaceae	Megasphaera	Megasphaera elsdenii
0.2926360128	0.2142086487	26037362655	0.0822697181	0.9344322342		Bacteria	Bacteroidetes	Bacteroidia	Bacteroidales	Prevotellaceae	Prevotella	Prevotella shahii
0.6655798609	0.7930228373	13514695626	0.5867855697	0.5573477295		Bacteria	Firmicutes	Bacilli	Lactobacillales	Leuconostocaceae	Weissella	Weissella confusa
0.6367509962	19104643307	1585388096	12050452097	0.2281858494		Bacteria	Firmicutes	Clostridia	Clostridiales	Clostridiaceae	Clostridium	Clostridium perfringens
0.0140089822	-0.0777306965	34062740023	-0.0228198602	0.981793966		Bacteria	Bacteroidetes	Bacteroidia	Bacteroidales	Prevotellaceae	Paraprevotella	Paraprevotella xylaniphila
0.7998921494	-19060253231	17520382272	-10878902603	0.2766435563		Bacteria	Firmicutes	Bacilli	Lactobacillales	Lactobacillaceae	Lactobacillus	Lactobacillus fermentum
0.2860286933	0.8801029827	34046339683	0.2585014985	0.7960198926		Bacteria	Firmicutes	Bacilli	Lactobacillales	Streptococcaceae	Lactococcus	Lactococcus garvieae;Lactococcus garvieae subsp. bovis
0.5387159572	-0.5264768252	17392647557	-0.3027007955	0.7621178915		Bacteria	Firmicutes	Bacilli	Lactobacillales	Lactobacillaceae	Lactobacillus	Lactobacillus delbrueckii;Lactobacillus delbrueckii subsp. bulgaricus
0.0811605774	-12093122724	33997285378	-0.3557084805	0.7220588934		Bacteria	Firmicutes	Bacilli	Lactobacillales	Streptococcaceae	Streptococcus	Streptococcus sobrinus
0.6799350447	-18539393761	23845326864	-0.7774854112	0.4368724384		Bacteria	Firmicutes	Bacilli	Lactobacillales	Leuconostocaceae	Leuconostoc	Leuconostoc lactis
0.7107955624	13824267441	11782778958	11732603565	0.2406914147		Bacteria	Actinobacteria	Coriobacteriia	Coriobacteriales	Coriobacteriaceae	Enorma	Enorma timonensis
0.2963872232	-0.7431105798	1571324391	-0.4729199038	0.6362703242		Bacteria	Proteobacteria	Gammaproteobacteria	Enterobacterales	Hafniaceae	Obesumbacterium	Obesumbacterium proteus
0.0998417531	-0.9736286451	34028818933	-0.2861188474	0.7747870966		Bacteria	Firmicutes	Bacilli	Lactobacillales	Lactobacillaceae	Pediococcus	Pediococcus stilesii
0.7666426323	1666910319	20284887655	0.8217498403	0.4112192868		Bacteria	Proteobacteria	Gammaproteobacteria	Enterobacterales	Enterobacteriaceae	Klebsiella	Klebsiella quasipneumoniae;Klebsiella quasipneumoniae subsp. quasipneumoniae
0.7418047161	-0.5117873697	18268582736	-0.2801461816	0.7793653548		Bacteria	Firmicutes	Erysipelotrichia	Erysipelotrichales	Erysipelotrichaceae	Longicatena	Longicatena caecimuris
0.1078249646	0.1817334955	31131963577	0.0583752114	0.9534497595		Bacteria	Firmicutes	Bacilli	Lactobacillales	Lactobacillaceae	Lactobacillus	Lactobacillus crispatus
0.0550301729	0.1829570706	34062037451	0.0537128969	0.9571639074		Bacteria	Bacteroidetes	Bacteroidia	Bacteroidales	Prevotellaceae	Marseilla	Marseilla massiliensis
0.6850497206	17783938692	13362013076	13309325916	0.1832111921		Bacteria	Firmicutes	Negativicutes	Veillonellales	Veillonellaceae	Veillonella	Veillonella tobetsuensis
0.7522765777	-15896249559	24363409743	-0.6524640732	0.5141018421		Bacteria	Proteobacteria	Gammaproteobacteria	Enterobacterales	Enterobacteriaceae	Klebsiella	Klebsiella oxytoca
0.1445846287	0.7531702508	18973887569	0.3969509401	0.6914036388		Bacteria	Firmicutes	Bacilli	Lactobacillales	Lactobacillaceae	Lactobacillus	Lactobacillus plantarum
0.5336455973	0.4327875886	33902051045	0.1276582317	0.8984194459		Bacteria	Synergistetes	Synergistia	Synergistales	Synergistaceae	Pyramidobacter	Pyramidobacter piscolens
0.6468273401	0.7588386399	14367120133	0.5281772776	0.5973762987		Bacteria	Firmicutes	Clostridia	Clostridiales	Peptostreptococcaceae	Paeniclostridium	Paeniclostridium sordellii
0.7765710274	19227217412	24653124467	0.7799099639	0.4354438732		Bacteria	Proteobacteria	Betaproteobacteria	Burkholderiales	Sutterellaceae	Turicimonas	Turicimonas muris
0.8346800488	17428243241	20683432765	0.8426185073	0.399441837		Bacteria	Firmicutes	Clostridia	Clostridiales	Clostridiaceae	Clostridium	Clostridium paraputrificum
0.1208865259	-0.3651849907	34054069052	-0.1072368151	0.9146011096		Bacteria	Firmicutes	Bacilli	Lactobacillales	Streptococcaceae	Lactococcus	Lactococcus piscium
0.6707735373	0.9685302537	14410507427	0.6721000344	0.5015200146		Bacteria	Firmicutes	Clostridia	Clostridiales	Clostridiaceae	Clostridium	Clostridium quinii
0.8867743425	14716859513	21189276955	0.694542789	0.4873418765		Bacteria	Bacteroidetes	Bacteroidia	Bacteroidales	Porphyromonadaceae	Porphyromonas	Porphyromonas loveana
0.5473960316	-22785855495	19882697549	-1146014289	0.2517892398		Bacteria	Proteobacteria	Gammaproteobacteria	Enterobacterales	Hafniaceae	Hafnia	Hafnia paralvei
0.7147074657	-13368658912	17526634008	-0.7627624852	0.445605058		Bacteria	Proteobacteria	Gammaproteobacteria	Enterobacterales	Enterobacteriaceae	Siccibacter	Siccibacter turicensis
0.3130383933	-0.2841898378	28741633398	-0.0988774138	0.9212356022		Bacteria	Firmicutes	Negativicutes	Veillonellales	Veillonellaceae	Megasphaera	Megasphaera micronuciformis
0.6834441347	-25099608053	21227016458	-11824369243	0.2370323793		Bacteria	Actinobacteria	Actinobacteria	Bifidobacteriales	Bifidobacteriaceae	Scardovia	Scardovia wiggsiae
0.6059189394	10966494023	16979391901	0.6458708349	0.518363009		Bacteria	Actinobacteria	Actinobacteria	Bifidobacteriales	Bifidobacteriaceae	Alloscardovia	Alloscardovia omnicolens
0.4612685964	-0.3183716088	31448275617	-0.1012365869	0.9193626537		Bacteria	Proteobacteria	Deltaproteobacteria	Desulfovibrionales	Desulfovibrionaceae	Mailhella	Mailhella massiliensis
0.3902063578	13645270616	34028236832	0.4009984615	0.6884212567		Bacteria	Firmicutes	Erysipelotrichia	Erysipelotrichales	Erysipelotrichaceae	Erysipelothrix	Erysipelothrix larvae
0.2266009558	-0.1633720469	16140571742	-0.1012182527	0.9193772076		Bacteria	Fusobacteria	Fusobacteriia	Fusobacteriales	Fusobacteriaceae	Fusobacterium	Fusobacterium nucleatum;Fusobacterium nucleatum subsp. animalis
0.28635876	0.3718909154	20633061368	0.1802402992	0.8569639223		Bacteria	Firmicutes	Tissierellia	Tissierellales	Peptoniphilaceae	Finegoldia	Finegoldia magna
0.6793141501	-0.4885637435	12576837091	-0.3884631247	0.6976733378		Bacteria	Cyanobacteria	Unclassified	Unclassified	Unclassified	Unclassified	Unclassified
0.8143483583	-1256934637	10644506286	-11808294375	0.2376704873		Bacteria	Firmicutes	Clostridia	Clostridiales	Lachnospiraceae	Lachnoclostridium	fimetarium
0.4584924053	18444491968	34002694894	0.5424420631	0.5875140095		Bacteria	Firmicutes	Tissierellia	Tissierellales	Peptoniphilaceae	Peptoniphilus	Peptoniphilus harei
0.3723227852	15073498186	30043979645	0.5017144321	0.6158684111		Bacteria	Actinobacteria	Actinobacteria	Streptosporangiales	Streptosporangiaceae	Streptosporangium	Streptosporangium jiaoheense
0.5703523415	21879061289	31342383096	0.6980662964	0.4851357345		Bacteria	Bacteroidetes	Sphingobacteriia	Sphingobacteriales	Sphingobacteriaceae	Pedobacter	Pedobacter solisilvae
0.2063898607	-0.2847855349	34044533726	-0.0836508842	0.9333340089		Bacteria	Firmicutes	Bacilli	Lactobacillales	Lactobacillaceae	Lactobacillus	Lactobacillus secaliphilus
0.0737625164	-0.565386506	3404687069	-0.1660612252	0.8681087683		Bacteria	Bacteroidetes	Bacteroidia	Bacteroidales	Prevotellaceae	Metaprevotella	Metaprevotella massiliensis
0.4279229933	-23631966641	1837582615	-12860356018	0.198430637		Bacteria	Bacteroidetes	Bacteroidia	Bacteroidales	Prevotellaceae	Prevotella	Prevotella oris
0.3221119827	0.8367934646	28990025318	0.2886487526	0.7728501835		Bacteria	Firmicutes	Bacilli	Lactobacillales	Leuconostocaceae	Weissella	Weissella viridescens
0.800887958	11142785762	10268568168	10851352963	0.2778617365		Bacteria	Firmicutes	Clostridia	Clostridiales	Lachnospiraceae	Lachnoclostridium	populeti
0.1885647716	-0.0968572357	34053280765	-0.02844285	0.9773089486		Bacteria	Firmicutes	Bacilli	Lactobacillales	Enterococcaceae	Enterococcus	Enterococcus avium
0.391890377	0.5963432177	15068324462	0.3957594749	0.6922824753		Bacteria	Firmicutes	Clostridia	Clostridiales	Lachnospiraceae	Anaerocolumna	Anaerocolumna aminovalerica
0.8102791853	0.6743015906	10314615888	0.6537340779	0.5132831441		Bacteria	Firmicutes	Clostridia	Clostridiales	Lachnospiraceae	Anaerotignum	Anaerotignum propionicum
0.5195930778	1748939088	20779975361	0.8416463723	0.3999859244		Bacteria	Firmicutes	Clostridia	Clostridiales	Clostridiaceae	Tindallia	Tindallia californiensis
0.1777289905	0.0290291535	24905811061	0.0116555745	0.9907004077		Bacteria	Synergistetes	Synergistia	Synergistales	Synergistaceae	Cloacibacillus	Cloacibacillus evryensis
0.8055853883	26214610605	18232129265	1437824964	0.1504837243		Bacteria	Tenericutes	Mollicutes	Entomoplasmatales	Spiroplasmataceae	Spiroplasma	Spiroplasma clarkii
0.5744460907	22072592276	23673268788	0.9323846433	0.3511377782		Bacteria	Firmicutes	Clostridia	Clostridiales	Lachnospiraceae	Acetitomaculum	Acetitomaculum ruminis
0.0405526315	-0.2777500156	34054069029	-0.0815614766	0.9349954364		Bacteria	Proteobacteria	Gammaproteobacteria	Enterobacterales	Enterobacteriaceae	Raoultella	Raoultella terrigena
0.8088203734	0.612353928	0.8862274314	0.6909670207	0.4895862664		Bacteria	Firmicutes	Clostridia	Clostridiales	Clostridiaceae	Caloramator	Caloramator australicus
0.0716958801	-0.6528214806	34046870709	-0.1917419919	0.8479443115		Bacteria	Firmicutes	Bacilli	Lactobacillales	Lactobacillaceae	Lactobacillus	Lactobacillus johnsonii
0.1830563672	-23891342723	33828554463	-0.7062478165	0.480034039		Bacteria	Bacteroidetes	Bacteroidia	Bacteroidales	Prevotellaceae	Prevotella	Prevotella oryzae
0.1940350262	0.2173959369	19808552339	0.1097485234	0.9126088167		Bacteria	Firmicutes	Bacilli	Lactobacillales	Lactobacillaceae	Lactobacillus	Lactobacillus satsumensis
0.1855668373	0.736431058	29461339728	0.2499652306	0.8026142372		Bacteria	Actinobacteria	Actinobacteria	Kineosporiales	Kineosporiaceae	Angustibacter	Angustibacter luteus
0.3863563069	-0.6907006554	24964453566	-0.2766736526	0.7820307046		Bacteria	Firmicutes	Bacilli	Lactobacillales	Enterococcaceae	Enterococcus	Enterococcus casseliflavus
0.7102057645	22517140935	212883439	10577215889	0.2901823898		Bacteria	Firmicutes	Clostridia	Clostridiales	Eubacteriaceae	Eubacterium	Eubacterium callanderi
0.4023848239	-20778354715	14905501235	-13940057693	0.1633158625		Bacteria	Firmicutes	Bacilli	Lactobacillales	Streptococcaceae	Streptococcus	Streptococcus troglodytidis
0.3765726882	-20979582043	20911661832	-10032479586	0.3157412387		Bacteria	Bacteroidetes	Bacteroidia	Bacteroidales	Bacteroidaceae	Bacteroides	Bacteroides caecicola
0.1893605757	-11667905856	33969327788	-0.3434835664	0.7312347018		Bacteria	Bacteroidetes	Bacteroidia	Bacteroidales	Prevotellaceae	Prevotella	Prevotella disiens
0.3921424081	0.0946835038	10847255298	0.0872879832	0.9304426056		Bacteria	Actinobacteria	Actinobacteria	Bifidobacteriales	Bifidobacteriaceae	Bifidobacterium	Bifidobacterium choerinum
0.4460180412	-28408630846	3371118261	-0.8427064448	0.3993926419		Bacteria	Firmicutes	Erysipelotrichia	Erysipelotrichales	Erysipelotrichaceae	Erysipelothrix	Erysipelothrix inopinata
0.8860948615	0.9364112139	19224972756	0.4870806455	0.6262011816		Bacteria	Firmicutes	Clostridia	Clostridiales	Clostridiaceae	Clostridium	Clostridium chartatabidum
0.3950032534	1683858266	22934066497	0.7342170505	0.4628164633		Bacteria	Proteobacteria	Alphaproteobacteria	Kiloniellales	Kiloniellaceae	Kiloniella	Kiloniella majae
0.3888282805	0.0585162298	17001986384	0.0344172901	0.9725443961		Bacteria	Firmicutes	Clostridia	Clostridiales	Lachnospiraceae	Sellimonas	Sellimonas intestinalis
0.2814161908	1394944872	30543910361	0.4567014687	0.6478856351		Bacteria	Actinobacteria	Coriobacteriia	Coriobacteriales	Coriobacteriaceae	Enorma	massiliensis
0.8666639241	1903159975	20931349493	0.9092390224	0.3632239701		Bacteria	Firmicutes	Clostridia	Clostridiales	Peptococcaceae	Desulfosporosinus	Desulfosporosinus nitroreducens
0.1560515038	0.6548991499	34051494652	0.1923261098	0.8474867675		Bacteria	Actinobacteria	Coriobacteriia	Eggerthellales	Eggerthellaceae	Slackia	Slackia equolifaciens
0.4480666934	0.6894259668	0.8795993197	0.7837954753	0.4331601293		Bacteria	Firmicutes	Clostridia	Clostridiales	Peptostreptococcaceae	Paeniclostridium	Paeniclostridium ghonii
0.6801069616	17316433214	16867209085	10266329852	0.3045933159		Bacteria	Firmicutes	Tissierellia	Tissierellales	Peptoniphilaceae	Anaerococcus	Anaerococcus senegalensis
0.0606216967	-0.3651849907	34054069052	-0.1072368151	0.9146011096		Bacteria	Bacteroidetes	Bacteroidia	Bacteroidales	Porphyromonadaceae	Porphyromonas	Porphyromonas asaccharolytica
0.2869222365	-0.5211488655	1399438086	-0.3723986583	0.7095960528		Bacteria	Firmicutes	Clostridia	Clostridiales	Clostridiaceae	Mordavella	Mordavella massiliensis
0.6020673201	-0.54168626	13457419712	-0.4025186638	0.6873023556		Bacteria	Firmicutes	Bacilli	Lactobacillales	Streptococcaceae	Streptococcus	Streptococcus danieliae
0.1363819316	0.0248278885	34045142005	0.0072926377	0.9941813686		Bacteria	Proteobacteria	Gammaproteobacteria	Pseudomonadales	Pseudomonadaceae	Pseudomonas	Pseudomonas aeruginosa
0.6046189173	-12249478833	2110242659	-0.5804772632	0.5615928152		Bacteria	Bacteroidetes	Bacteroidia	Bacteroidales	Porphyromonadaceae	Porphyromonas	Porphyromonas gingivalis
0.3728100988	-0.2745314662	2514341417	-0.1091862324	0.91305478		Bacteria	Bacteroidetes	Bacteroidia	Bacteroidales	Porphyromonadaceae	Porphyromonas	Porphyromonas bennonis
0.8190239101	12536652261	12297551616	10194429471	0.3079927259		Bacteria	Actinobacteria	Actinobacteria	Corynebacteriales	Corynebacteriaceae	Corynebacterium	Corynebacterium durum
0.2069549455	0.6227989	18663450904	0.3336997553	0.7386061342		Bacteria	Firmicutes	Clostridia	Clostridiales	Clostridiaceae	Crassaminicella	Crassaminicella profunda
0.1963080533	0.8379833589	18443513725	0.454351254	0.6495760314		Bacteria	Firmicutes	Bacilli	Lactobacillales	Aerococcaceae	Abiotrophia	Abiotrophia defectiva
0.8128060533	0.729001975	11402310016	0.6393458642	0.5225979581		Bacteria	Actinobacteria	Coriobacteriia	Eggerthellales	Eggerthellaceae	Eggerthella	Eggerthella timonensis
0.6186447307	19648370428	14092077577	13942848612	0.1632316006		Bacteria	Actinobacteria	Actinobacteria	Bifidobacteriales	Bifidobacteriaceae	Bifidobacterium	Bifidobacterium biavatii
0.7519614264	16996528222	14113366652	12042858831	0.2284791011		Bacteria	Firmicutes	Clostridia	Clostridiales	Lachnospiraceae	Cellulosilyticum	Cellulosilyticum lentocellum
0.4499307318	-0.9244854133	1803265031	-0.5126730666	0.6081800329		Bacteria	Firmicutes	Negativicutes	Selenomonadales	Selenomonadaceae	Mitsuokella	Mitsuokella multacida
0.4577940034	-26600943257	33756366454	-0.7880274464	0.4306806518		Bacteria	Bacteroidetes	Bacteroidia	Bacteroidales	Lentimicrobiaceae	Lentimicrobium	Lentimicrobium saccharophilum
0.247465879	-0.9509513341	12046364332	-0.7894094084	0.4298727587		Bacteria	Actinobacteria	Actinobacteria	Micrococcales	Bogoriellaceae	Georgenia	Georgenia halophila
0.0304078415	0.0097046962	3406274001	0.002849065	0.9977267781		Bacteria	Bacteroidetes	Bacteroidia	Bacteroidales	Prevotellaceae	Prevotella	Prevotella buccalis
0.2376904803	0.567513651	14679784098	0.3865953663	0.6990557889		Bacteria	Actinobacteria	Actinobacteria	Actinomycetales	Actinomycetaceae	Actinobaculum	Actinobaculum massiliense
0.3573925656	-0.1208003892	29672942711	-0.0407106199	0.9675265952		Bacteria	Firmicutes	Tissierellia	Unclassified	Unclassified	Unclassified	Unclassified
0.1364928493	0.1905969806	34061951933	0.0559559772	0.9553768773		Bacteria	Firmicutes	Bacilli	Lactobacillales	Lactobacillaceae	Lactobacillus	Lactobacillus hominis
0.5151882906	-0.7082738094	26518757392	-0.2670840865	0.7894044198		Bacteria	Firmicutes	Clostridia	Clostridiales	Clostridiaceae	Clostridium	Clostridium swellfunianum
0.7842005205	-0.7323950789	12530812192	-0.5844753458	0.5589005476		Bacteria	Firmicutes	Clostridia	Clostridiales	Clostridiaceae	Clostridium	Clostridium tepidum
0.1771549146	-0.1311638341	24497033884	-0.053542741	0.9572994771		Bacteria	Actinobacteria	Actinobacteria	Bifidobacteriales	Bifidobacteriaceae	Parascardovia	Parascardovia denticolens
0.3094512975	-0.2914375431	23748276496	-0.12271945	0.9023292614		Bacteria	Firmicutes	Bacilli	Lactobacillales	Enterococcaceae	Enterococcus	Enterococcus pallens
0.8843178815	-0.9577988503	0.7971304726	-1201558444	0.2295346501		Bacteria	Firmicutes	Clostridia	Clostridiales	Ruminococcaceae	Ruminococcus	Ruminococcus gauvreauii
0.2804409107	0.5129235525	18563376298	0.2763094085	0.7823104301		Bacteria	Firmicutes	Bacilli	Lactobacillales	Streptococcaceae	Streptococcus	Streptococcus cristatus
0.4048551315	-0.746327568	15777710616	-0.4730265285	0.6361942528		Bacteria	Firmicutes	Clostridia	Clostridiales	Hungateiclostridiaceae	Thermoclostridium	Thermoclostridium stercorarium
0.1393676637	0.5640637458	20931978581	0.2694746431	0.7875644526		Bacteria	Firmicutes	Bacilli	Lactobacillales	Lactobacillaceae	Lactobacillus	Lactobacillus algidus
0.6293331377	-0.9342891862	0.8936482502	-10454775533	0.2958023097		Bacteria	Firmicutes	Clostridia	Clostridiales	Lachnospiraceae	Lachnoclostridium	saccharolyticum
0.7935004711	-0.0745757124	10065998775	-0.074086749	0.9409413591		Bacteria	Firmicutes	Clostridia	Clostridiales	Ruminococcaceae	Caproiciproducens	Caproiciproducens galactitolivorans
0.1195933029	-0.0957416308	2448214706	-0.0391067134	0.9688053085		Bacteria	Proteobacteria	Gammaproteobacteria	Enterobacterales	Enterobacteriaceae	Raoultella	Raoultella ornithinolytica
0.3840961986	15582634369	26025481096	0.5987452955	0.5493427469		Bacteria	Proteobacteria	Alphaproteobacteria	Rhodospirillales	Rhodospirillaceae	Novispirillum	Novispirillum itersonii;Novispirillum itersonii subsp. nipponicum
0.1706679292	0.6251546947	13895692139	0.4498910083	0.6527890314		Bacteria	Actinobacteria	Actinobacteria	Actinomycetales	Actinomycetaceae	Actinomyces	Actinomyces massiliensis
0.3562311093	11394072872	25897524525	0.4399676448	0.6599605414		Bacteria	Firmicutes	Clostridia	Clostridiales	Clostridiales Family XIII. Incertae Sedis	Casaltella	Casaltella massiliensis
0.6222111773	12255559337	24059180743	0.5093922136	0.610477333		Bacteria	Proteobacteria	Gammaproteobacteria	Enterobacterales	Enterobacteriaceae	Klebsiella	Klebsiella grimontii
0.4140137087	-0.859857215	25438396426	-0.3380154946	0.7353515113		Bacteria	Bacteroidetes	Bacteroidia	Bacteroidales	Porphyromonadaceae	Porphyromonas	Porphyromonas pasteri
0.1290093323	-0.1585879453	34041757674	-0.0465862976	0.9628429531		Bacteria	Proteobacteria	Alphaproteobacteria	Kiloniellales	Kiloniellaceae	Kiloniella	Kiloniella litopenaei
0.8925979785	0.0077136199	14987291511	0.0051467738	0.9958934868		Bacteria	Actinobacteria	Coriobacteriia	Coriobacteriales	Atopobiaceae	Olsenella	Olsenella profusa
0.4666279813	-10352561564	11278790966	-0.9178786623	0.3586823938		Bacteria	Firmicutes	Clostridia	Clostridiales	Caldicoprobacteraceae	Caldicoprobacter	Caldicoprobacter algeriensis
0.5781716776	14981115059	10432825408	1435959529	0.1510138577		Bacteria	Firmicutes	Clostridia	Clostridiales	Hungateiclostridiaceae	Hungateiclostridium	Hungateiclostridium straminisolvens
0.522189354	0.5411404371	26038944063	0.207819655	0.8353697852		Bacteria	Firmicutes	Bacilli	Lactobacillales	Enterococcaceae	Enterococcus	Enterococcus canis
0.8797765934	0.3023937499	22703048949	0.1331952156	0.8940389945		Bacteria	Proteobacteria	Gammaproteobacteria	Enterobacterales	Budviciaceae	Leminorella	Leminorella grimontii
0.4242143615	-10302543368	12821035884	-0.803565598	0.4216478979		Bacteria	Firmicutes	Bacilli	Lactobacillales	Streptococcaceae	Streptococcus	Streptococcus saliviloxodontae
0.6428887824	13511530824	16015153575	0.8436716364	0.3988529214		Bacteria	Firmicutes	Clostridia	Clostridiales	Peptostreptococcaceae	Peptoclostridium	Peptoclostridium acidaminophilum
0.4212656048	0.7670723814	21876342137	0.3506401466	0.7258583338		Bacteria	Bacteroidetes	Bacteroidia	Bacteroidales	Prevotellaceae	Prevotella	Prevotella bivia
0.3898374677	0.7771250601	15215469742	0.5107466764	0.609528452		Bacteria	Actinobacteria	Actinobacteria	Actinomycetales	Actinomycetaceae	Actinomyces	Actinomyces bowdenii
0.5852299425	-0.0287582092	12575309238	-0.0228687889	0.9817549367		Bacteria	Firmicutes	Clostridia	Clostridiales	Clostridiaceae	Beduini	Beduini massiliensis
0.1299140116	-19808015858	33908799699	-0.5841556184	0.559115618		Bacteria	Firmicutes	Erysipelotrichia	Erysipelotrichales	Erysipelotrichaceae	Catenisphaera	Catenisphaera adipataccumulans
0.4928736029	-0.1152809043	14369656023	-0.0802252358	0.9360581196		Bacteria	Firmicutes	Clostridia	Clostridiales	Eubacteriaceae	Eubacterium	Eubacterium uniforme
0.7393039527	-0.3364364304	11183775222	-0.3008254581	0.7635475943		Bacteria	Firmicutes	Clostridia	Clostridiales	Clostridiales Family XIII. Incertae Sedis	Unclassified	Unclassified
0.0830939695	0.0097046962	3406274001	0.002849065	0.9977267781		Bacteria	Proteobacteria	Gammaproteobacteria	Enterobacterales	Enterobacteriaceae	Citrobacter	Citrobacter braakii
0.1665959597	-15744140219	24857254558	-0.6333821051	0.526484148		Bacteria	Firmicutes	Clostridia	Clostridiales	Peptococcaceae	Desulfosporosinus	Desulfosporosinus orientis
0.1426616691	-0.1946713182	24496534188	-0.0794689227	0.9366596495		Bacteria	Firmicutes	Clostridia	Clostridiales	Clostridiaceae	Clostridium	Clostridium neuense
0.4078353883	-0.6618361324	10237617099	-0.6464747861	0.517971921		Bacteria	Bacteroidetes	Bacteroidia	Bacteroidales	Bacteroidaceae	Bacteroides	Bacteroides graminisolvens
0.0301105522	0.0097046962	3406274001	0.002849065	0.9977267781		Bacteria	Bacteroidetes	Bacteroidia	Bacteroidales	Prevotellaceae	Prevotella	Prevotella oulorum
0.2191825218	0.6521317803	34051560529	0.1915130379	0.8481236668		Bacteria	Proteobacteria	Gammaproteobacteria	Enterobacterales	Enterobacteriaceae	Kluyvera	Kluyvera ascorbata
0.3227429482	-0.2304944607	13910225524	-0.1657014549	0.868391901		Bacteria	Firmicutes	Clostridia	Clostridiales	Hungateiclostridiaceae	Hungateiclostridium	Hungateiclostridium aldrichii
0.1369097265	0.7884466704	34048455253	0.2315660621	0.8168750696		Bacteria	Firmicutes	Bacilli	Lactobacillales	Lactobacillaceae	Lactobacillus	Lactobacillus alimentarius
0.1800942121	0.9120502745	16708698563	0.545853569	0.5851665968		Bacteria	Proteobacteria	Deltaproteobacteria	Desulfovibrionales	Desulfovibrionaceae	Desulfovibrio	Desulfovibrio termitidis
0.1324974766	-0.3311653876	25481616401	-0.1299624727	0.8965961173		Bacteria	Firmicutes	Bacilli	Lactobacillales	Lactobacillaceae	Lactobacillus	Lactobacillus faecis
0.0871753514	-0.87387305	34030248602	-0.2567930256	0.7973385544		Bacteria	Proteobacteria	Epsilonproteobacteria	Campylobacterales	Campylobacteraceae	Campylobacter	Campylobacter hominis
0.3056244227	0.6647036583	16417385862	0.4048778922	0.6855672697		Bacteria	Firmicutes	Tissierellia	Tissierellales	Peptoniphilaceae	Anaerococcus	Anaerococcus prevotii
0.2639642805	-0.5178762214	18932093478	-0.2735440864	0.784435008		Bacteria	Firmicutes	Clostridia	Clostridiales	Clostridiaceae	Clostridium	Clostridium moniliforme
0.2738720233	0.9784938546	29057451028	0.3367445595	0.7363094695		Bacteria	Actinobacteria	Actinobacteria	Actinomycetales	Actinomycetaceae	Actinomyces	Actinomyces naeslundii
0.5835932046	13165697769	0.8268000902	15923677229	0.1113021042		Bacteria	Firmicutes	Clostridia	Clostridiales	Lachnospiraceae	Anaerostipes	Anaerostipes butyraticus
0.2471478628	10062986059	24896757579	0.4041886188	0.6860740223		Bacteria	Proteobacteria	Alphaproteobacteria	Rhodospirillales	Rhodospirillaceae	Marispirillum	Marispirillum indicum
0.1132618639	0.1902599315	30823901943	0.0617248043	0.9507819867		Bacteria	Bacteroidetes	Bacteroidia	Bacteroidales	Bacteroidaceae	Bacteroides	Bacteroides salanitronis
0.2194829955	0.05649147	24660162659	0.0229079876	0.9817236689		Bacteria	Actinobacteria	Actinobacteria	Actinomycetales	Actinomycetaceae	Schaalia	Schaalia georgiae
0.2481605705	-0.6563067368	12665516757	-0.5181839394	0.6043299393		Bacteria	Proteobacteria	Deltaproteobacteria	Desulfovibrionales	Desulfovibrionaceae	Desulfovibrio	Desulfovibrio vulgaris
0.3633626408	0.8620769729	25204999583	0.3420261802	0.7323311901		Bacteria	Firmicutes	Tissierellia	Tissierellales	Peptoniphilaceae	Peptoniphilus	Peptoniphilus lacrimalis
0.4880384979	0.2604595362	16277101246	0.1600159219	0.8728685319		Bacteria	Firmicutes	Bacilli	Lactobacillales	Enterococcaceae	Enterococcus	Enterococcus gallinarum
0.119115506	-0.3651849907	34054069052	-0.1072368151	0.9146011096		Bacteria	Actinobacteria	Actinobacteria	Propionibacteriales	Propionibacteriaceae	Propionibacterium	Propionibacterium acidifaciens
0.2363001948	-15632928918	28783219414	-0.5431264895	0.5870427153		Bacteria	Proteobacteria	Gammaproteobacteria	Enterobacterales	Hafniaceae	Hafnia	Hafnia alvei
0.2810911631	-0.1877363212	20610222777	-0.0910889335	0.9274219259		Bacteria	Firmicutes	Bacilli	Lactobacillales	Lactobacillaceae	Lactobacillus	Lactobacillus graminis
0.4326730193	-122264633	1423214694	-0.8590737119	0.3902998496		Bacteria	Firmicutes	Bacilli	Lactobacillales	Streptococcaceae	Streptococcus	Streptococcus sanguinis
0.1503401569	-0.2833410532	24273351104	-0.1167292691	0.9070745955		Bacteria	Bacteroidetes	Bacteroidia	Bacteroidales	Porphyromonadaceae	Porphyromonas	Porphyromonas endodontalis
0.1237743487	0.1905969806	34061951933	0.0559559772	0.9553768773		Bacteria	Proteobacteria	Gammaproteobacteria	Enterobacterales	Erwiniaceae	Pantoea	Pantoea dispersa
0.0644790818	-0.7402564553	34046870728	-0.2174227585	0.8278788967		Bacteria	Proteobacteria	Gammaproteobacteria	Enterobacterales	Erwiniaceae	Erwinia	Erwinia tasmaniensis
0.2022678018	0.3119557044	29021715152	0.1074904439	0.9143999061		Bacteria	Firmicutes	Bacilli	Lactobacillales	Enterococcaceae	Enterococcus	Enterococcus massiliensis
0.2282574662	0.4801549409	24546962728	0.1956066607	0.8449180465		Bacteria	Proteobacteria	Betaproteobacteria	Burkholderiales	Oxalobacteraceae	Massilia	Massilia suwonensis
0.3254524903	15323699208	26052762852	0.5881794301	0.5564118627		Bacteria	Proteobacteria	Gammaproteobacteria	Enterobacterales	Morganellaceae	Proteus	Proteus vulgaris
0.0900954565	-0.3868390582	25234254871	-0.1532991801	0.8781623472		Bacteria	Firmicutes	Clostridia	Clostridiales	Lachnospiraceae	Herbinix	Herbinix hemicellulosilytica
0.2208900307	-0.1494319177	16655544089	-0.0897190251	0.9285104971		Bacteria	Actinobacteria	Actinobacteria	Bifidobacteriales	Bifidobacteriaceae	Bifidobacterium	Bifidobacterium asteroides
0.1162151316	0.1054634431	18132338306	0.0581631786	0.9536186503		Bacteria	Actinobacteria	Acidimicrobiia	Acidimicrobiales	Acidimicrobiaceae	Aciditerrimonas	Aciditerrimonas ferrireducens
0.1457391274	0.4579131571	1671858365	0.2738947071	0.7841655393		Bacteria	Bacteroidetes	Bacteroidia	Bacteroidales	Barnesiellaceae	Barnesiella	Barnesiella viscericola
0.2057308188	0.569085837	18453319576	0.3083921213	0.7577839763		Bacteria	Firmicutes	Bacilli	Lactobacillales	Streptococcaceae	Streptococcus	Streptococcus panodentis
0.2304667418	0.6829266593	2163623262	0.3156402833	0.752275558		Bacteria	Firmicutes	Bacilli	Lactobacillales	Enterococcaceae	Enterococcus	Enterococcus columbae
0.4244857416	13347691415	15164944562	0.8801675048	0.3787685742		Bacteria	Bacteroidetes	Bacteroidia	Bacteroidales	Bacteroidaceae	Bacteroides	Bacteroides zoogleoformans
0.0377729078	-0.0777306965	34062740023	-0.0228198602	0.981793966		Bacteria	Actinobacteria	Coriobacteriia	Coriobacteriales	Coriobacteriaceae	Enorma	Enorma phocaeensis
0.2603890453	-19479476029	33864240301	-0.5752225904	0.5651407665		Bacteria	Firmicutes	Bacilli	Lactobacillales	Lactobacillaceae	Lactobacillus	Lactobacillus panis
0.1343562414	-0.2815055343	18282006377	-0.1539795625	0.8776258502		Bacteria	Firmicutes	Bacilli	Bacillales	Thermoactinomycetaceae	Salinithrix	Salinithrix halophila
0.8188172971	-0.3223291845	13992124142	-0.2303647261	0.8178083686		Bacteria	Proteobacteria	Gammaproteobacteria	Enterobacterales	Enterobacteriaceae	Escherichia	Escherichia albertii
0.2613416642	-2625746908	33773959783	-0.777447159	0.4368949985		Bacteria	Firmicutes	Clostridia	Clostridiales	Clostridiaceae	Clostridium	Clostridium punense
0.3639665028	-25416318198	24153744733	-10522723693	0.2926746048		Bacteria	Proteobacteria	Gammaproteobacteria	Enterobacterales	Yersiniaceae	Serratia	Serratia aquatilis
0.6153146322	0.0466728324	23468070831	0.0198878011	0.9841328766		Bacteria	Proteobacteria	Gammaproteobacteria	Enterobacterales	Erwiniaceae	Phaseolibacter	Phaseolibacter flectens
0.3025790004	0.687400684	2890893533	0.2377813905	0.812050653		Bacteria	Firmicutes	Bacilli	Lactobacillales	Streptococcaceae	Streptococcus	Streptococcus minor
0.5534571744	20119507443	23407486271	0.8595330233	0.3900465088		Bacteria	Firmicutes	Bacilli	Bacillales	Bacillaceae	Bacillus	Bacillus populi
0.1409519172	-0.8122125958	20503743281	-0.3961289335	0.6920099146		Bacteria	Firmicutes	Clostridia	Clostridiales	Hungateiclostridiaceae	Mageeibacillus	Mageeibacillus indolicus
0.2342484993	-0.6528214806	34046870709	-0.1917419919	0.8479443115		Bacteria	Firmicutes	Bacilli	Lactobacillales	Streptococcaceae	Streptococcus	Streptococcus uberis
0.1919381196	0.4526748743	34031140549	0.1330178381	0.8941792731		Bacteria	Firmicutes	Bacilli	Lactobacillales	Lactobacillaceae	Lactobacillus	Lactobacillus nagelii
0.8187295761	20238457977	18596721805	10882809448	0.2764711		Bacteria	Firmicutes	Clostridia	Clostridiales	Clostridiaceae	Clostridium	Clostridium chauvoei
0.1670228565	0.9764665228	34043496917	0.2868290896	0.7742431881		Bacteria	Firmicutes	Erysipelotrichia	Erysipelotrichales	Erysipelotrichaceae	Absiella	Absiella tortuosum
0.3037859772	-241189636	28852771311	-0.8359323041	0.4031929879		Bacteria	Firmicutes	Clostridia	Clostridiales	Lachnospiraceae	Cuneatibacter	Cuneatibacter caecimuris
0.0986895568	-0.6454125243	30477650811	-0.2117658373	0.8322897219		Bacteria	Firmicutes	Clostridia	Clostridiales	Lachnospiraceae	Stomatobaculum	Stomatobaculum longum
0.3887471332	10337271943	29362668323	0.3520549233	0.724797073		Bacteria	Firmicutes	Tissierellia	Tissierellales	Peptoniphilaceae	Peptoniphilus	Peptoniphilus coxii
0.306257637	0.4218512002	14341215766	0.2941530251	0.768640974		Bacteria	Actinobacteria	Actinobacteria	Micrococcales	Dermatophilaceae	Kineosphaera	Kineosphaera limosa
0.1405853034	-0.096416691	29099743874	-0.0331331751	0.9735683873		Bacteria	Actinobacteria	Actinobacteria	Bifidobacteriales	Bifidobacteriaceae	Bifidobacterium	Bifidobacterium gallicum
0.3385553466	0.2766240181	29503731575	0.0937589936	0.9253006065		Bacteria	Firmicutes	Bacilli	Lactobacillales	Enterococcaceae	Tetragenococcus	Tetragenococcus halophilus
0.2756952469	10154731411	29256302971	0.3470955104	0.7285195663		Bacteria	Proteobacteria	Alphaproteobacteria	Rhodospirillales	Acetobacteraceae	Acetobacter	Acetobacter malorum
0.2279761848	0.2206094957	24128481196	0.0914311572	0.9271500056		Bacteria	Firmicutes	Clostridia	Clostridiales	Clostridiaceae	Caloramator	Caloramator boliviensis
0.0595390321	0.0972071953	34062730929	0.0285376987	0.977233301		Bacteria	Bacteroidetes	Bacteroidia	Bacteroidales	Prevotellaceae	Prevotella	Prevotella saccharolytica
0.2489922291	0.6838062963	25379550606	0.2694319954	0.7875972674		Bacteria	Actinobacteria	Actinobacteria	Bifidobacteriales	Bifidobacteriaceae	Bifidobacterium	Bifidobacterium animalis
0.1278513583	-0.3921648173	30751214577	-0.1275282368	0.8985223259		Bacteria	Actinobacteria	Coriobacteriia	Coriobacteriales	Coriobacteriaceae	Collinsella	Collinsella phocaeensis
0.235121915	0.0160714614	13121531304	0.0122481599	0.9902276266		Bacteria	Firmicutes	Clostridia	Clostridiales	Clostridiaceae	Clostridium	Clostridium putrefaciens
0.0593818771	0.0970760428	34062731438	0.0284991951	0.97726401		Bacteria	Bacteroidetes	Bacteroidia	Bacteroidales	Porphyromonadaceae	Porphyromonas	Porphyromonas somerae
0.2277475483	0.4502751602	14054417444	0.3203798108	0.7486804283		Bacteria	Bacteroidetes	Bacteroidia	Bacteroidales	Bacteroidaceae	Bacteroides	Bacteroides caecigallinarum
0.1356071023	0.0297268427	2211494371	0.0134419708	0.989275182		Bacteria	Firmicutes	Clostridia	Clostridiales	Lachnospiraceae	Syntrophococcus	Syntrophococcus sucromutans
0.3699303858	0.1144889978	21519580118	0.0532022452	0.9575707667		Bacteria	Firmicutes	Clostridia	Clostridiales	Peptostreptococcaceae	Paeniclostridium	tenue
0.160930378	0.4530571548	22042835772	0.2055348774	0.8371542515		Bacteria	Firmicutes	Clostridia	Clostridiales	Lachnospiraceae	Lachnoanaerobaculum	Lachnoanaerobaculum saburreum
0.4297252736	-0.6522336937	21850908906	-0.2984927064	0.765327142		Bacteria	Proteobacteria	Gammaproteobacteria	Enterobacterales	Enterobacteriaceae	Kosakonia	Kosakonia radicincitans
0.3499564444	-0.0453074151	34013123953	-0.0133205686	0.9893720383		Bacteria	Firmicutes	Negativicutes	Veillonellales	Veillonellaceae	Dialister	Dialister propionicifaciens
0.1175049678	-15942511364	3395328735	-0.4695424982	0.6386819152		Bacteria	Bacteroidetes	Bacteroidia	Bacteroidales	Prevotellaceae	Prevotella	Prevotella amnii
0.1034763805	-0.2222562067	34055619956	-0.0652627105	0.9479648317		Bacteria	Actinobacteria	Actinobacteria	Actinomycetales	Actinomycetaceae	Schaalia	Schaalia turicensis
0.2325897054	0.5222806404	21477902692	0.243171155	0.8078728113		Bacteria	Firmicutes	Clostridia	Clostridiales	Lachnospiraceae	Hespellia	Hespellia stercorisuis
0.1539276659	0.2435471166	21151672271	0.115143197	0.9083316214		Bacteria	Proteobacteria	Gammaproteobacteria	Enterobacterales	Morganellaceae	Cosenzaea	Cosenzaea myxofaciens
0.1258420865	-11282319028	24974254143	-0.451757997	0.6514433319		Bacteria	Firmicutes	Clostridia	Clostridiales	Lachnospiraceae	Lachnoclostridium	Lachnoclostridium phytofermentans
0.2681482869	-0.5294817319	17205220285	-0.3077448141	0.7582765167		Bacteria	Firmicutes	Clostridia	Clostridiales	Defluviitaleaceae	Defluviitalea	Defluviitalea saccharophila
0.1585523206	0.3244242908	2111443431	0.1536504772	0.8778853344		Bacteria	Proteobacteria	Gammaproteobacteria	Chromatiales	Unclassified	Unclassified	Unclassified
0.1801123886	-0.4768244117	28361732522	-0.1681224556	0.8664869438		Bacteria	Firmicutes	Clostridia	Clostridiales	Hungateiclostridiaceae	Ruminiclostridium	Ruminiclostridium josui
0.0550041468	0.0972071953	34062730929	0.0285376987	0.977233301		Bacteria	Bacteroidetes	Bacteroidia	Bacteroidales	Prevotellaceae	Prevotella	Prevotella dentalis
0.0506767553	-0.2777500156	34054069029	-0.0815614766	0.9349954364		Bacteria	Proteobacteria	Alphaproteobacteria	Parvularculales	Parvularculaceae	Hyphococcus	Hyphococcus flavus
0.3509426167	0.8624307804	21857517605	0.394569409	0.6931606936		Bacteria	Actinobacteria	Actinobacteria	Bifidobacteriales	Bifidobacteriaceae	Bifidobacterium	Bifidobacterium stellenboschense
0.1038287772	-0.6311175152	30935822972	-0.2040086394	0.8383467476		Bacteria	Firmicutes	Bacilli	Lactobacillales	Lactobacillaceae	Lactobacillus	Lactobacillus sucicola
0.2483245381	-0.0898093767	24070972892	-0.0373102396	0.9702376411		Bacteria	Actinobacteria	Coriobacteriia	Eggerthellales	Eggerthellaceae	Slackia	Slackia exigua
0.1825861044	0.5980336002	29066946996	0.2057435204	0.8369912614		Bacteria	Firmicutes	Clostridia	Clostridiales	Clostridiaceae	Clostridium	Clostridium oryzae
0.0509261048	0.0097046962	3406274001	0.002849065	0.9977267781		Bacteria	Proteobacteria	Gammaproteobacteria	Enterobacterales	Erwiniaceae	Pantoea	plantarum
0.1516997174	0.0034108393	24081301251	0.001416385	0.9988698887		Bacteria	Firmicutes	Clostridia	Clostridiales	Clostridiaceae	Clostridium	Clostridium amylolyticum
0.1246409542	0.0972071953	34062730929	0.0285376987	0.977233301		Bacteria	Firmicutes	Bacilli	Lactobacillales	Streptococcaceae	Streptococcus	Streptococcus dentirousetti
0.5432686207	0.5338562005	14208769592	0.3757230329	0.7071228126		Bacteria	Actinobacteria	Actinobacteria	Bifidobacteriales	Bifidobacteriaceae	Bifidobacterium	Bifidobacterium saeculare
0.2151937046	0.3579811651	21628080052	0.1655168486	0.8685371895		Bacteria	Firmicutes	Clostridia	Clostridiales	Clostridiaceae	Oceanirhabdus	Oceanirhabdus sediminicola
0.2305315342	0.0467011276	15011704235	0.0311098106	0.9751819657		Bacteria	Firmicutes	Clostridia	Clostridiales	Eubacteriaceae	Alkalibaculum	Alkalibaculum bacchi
0.7560835156	-14398447406	11144959815	-1291924569	0.1963832683		Bacteria	Firmicutes	Clostridia	Clostridiales	Clostridiaceae	Caloramator	Caloramator fervidus
0.1593065009	0.2193195048	20791185329	0.105486773	0.915989565		Bacteria	Firmicutes	Clostridia	Clostridiales	Clostridiaceae	Clostridium	Clostridium merdae
0.0938229904	0.1427735153	25655382295	0.0556505117	0.9556202243		Bacteria	Firmicutes	Bacilli	Lactobacillales	Lactobacillaceae	Lactobacillus	Lactobacillus animalis
0.1067765974	0.1340750015	30744441847	0.0436095091	0.9652156718		Bacteria	Actinobacteria	Coriobacteriia	Coriobacteriales	Coriobacteriaceae	Enorma	Enorma massiliensis
0	0	0	0	1		Bacteria	Firmicutes	Clostridia	Clostridiales	Clostridiaceae	Clostridium	Clostridium isatidis
0.4643103449	0.3554552501	25528240895	0.1392400094	0.8892604935		Bacteria	Firmicutes	Bacilli	Lactobacillales	Enterococcaceae	Enterococcus	Enterococcus pseudoavium
0.0556634094	0.1829918409	3251349577	0.0562818105	0.955117309		Bacteria	Proteobacteria	Alphaproteobacteria	Rhodospirillales	Rhodospirillaceae	Dongia	Dongia soli
0.070853891	0.1906157509	31466731283	0.0605769151	0.9516961588		Bacteria	Firmicutes	Clostridia	Clostridiales	Eubacteriaceae	Eubacterium	Eubacterium limosum
0.339041009	0.9201099696	10505029033	0.8758757036	0.3810976092		Bacteria	Firmicutes	Clostridia	Clostridiales	Lachnospiraceae	Lachnoclostridium	amygdalinum
0.1994359702	0.3312894494	20855495063	0.158849957	0.8737870885		Bacteria	Bacteroidetes	Bacteroidia	Bacteroidales	Bacteroidaceae	Bacteroides	Bacteroides stercorirosoris
0.4333774901	-0.3742315431	12438004984	-0.3008774668	0.7635079335		Bacteria	Firmicutes	Clostridia	Clostridiales	Lachnospiraceae	Anaerocolumna	Anaerocolumna jejuensis
0.5258719593	0.3545268348	11898475028	0.2979598931	0.7657337746		Bacteria	Proteobacteria	Deltaproteobacteria	Desulfovibrionales	Desulfovibrionaceae	Desulfovibrio	Desulfovibrio idahonensis
0.7217773175	-40943934753	20359638935	-20110344237	0.0443218208		Bacteria	Firmicutes	Bacilli	Lactobacillales	Streptococcaceae	Lactococcus	Lactococcus taiwanensis
0.2132575032	0.1088469972	34049483151	0.0319672979	0.97449813		Bacteria	Firmicutes	Erysipelotrichia	Erysipelotrichales	Erysipelotrichaceae	Faecalicoccus	Faecalicoccus pleomorphus
0.1389958997	-0.190247492	34054059948	-0.0558663174	0.9554483038		Bacteria	Firmicutes	Bacilli	Lactobacillales	Streptococcaceae	Streptococcus	Streptococcus downei
0.2115325042	-1027478078	24049887519	-0.4272278102	0.6692134073		Bacteria	Proteobacteria	Gammaproteobacteria	Enterobacterales	Enterobacteriaceae	Klebsiella	Klebsiella pneumoniae
0.3337094619	-0.9659566492	21851452387	-0.4420560391	0.6584486548		Bacteria	Firmicutes	Clostridia	Clostridiales	Hungateiclostridiaceae	Ruminiclostridium	Ruminiclostridium sufflavum
0.5275799754	13133395315	14487376919	0.9065405966	0.3646497874		Bacteria	Firmicutes	Clostridia	Clostridiales	Hungateiclostridiaceae	Hungateiclostridium	Hungateiclostridium cellulolyticum

## Sheet: T2D vs T2D+F
baseMean	log2FoldChange	lfcSE	stat	pvalue	padj	Domain	Phylum	Class	Order	Family	Genus	Species
114647098693	219525562441	31455286441	69789719719	297.348	0.000000001	Bacteria	Actinobacteria	Coriobacteriia	Coriobacteriales	Coriobacteriaceae	Collinsella	Collinsella tanakaei
925929907169	-113525903613	21657264913	-52419317059	1.58904e+07	2.61397e+09	Bacteria	Bacteroidetes	Bacteroidia	Bacteroidales	Bacteroidaceae	Bacteroides	Bacteroides coprophilus
69694751188	47150521724	10212373918	46169991524	3.89329e+08	0.000426964	Bacteria	Bacteroidetes	Bacteroidia	Bacteroidales	Bacteroidaceae	Bacteroides	Bacteroides eggerthii
1105547808651	34996344464	0.8506769085	41139408057	3.88961e+09	0.003199206	Bacteria	Bacteroidetes	Bacteroidia	Bacteroidales	Bacteroidaceae	Bacteroides	Bacteroides cellulosilyticus
193302393145	77972564663	19843560711	39293635754	0.000085171	0.0056042505	Bacteria	Firmicutes	Negativicutes	Veillonellales	Veillonellaceae	Megasphaera	Megasphaera massiliensis
164664446948	55118324366	15417915052	35749531749	0.0003502906	0.0192076003	Bacteria	Firmicutes	Clostridia	Clostridiales	Hungateiclostridiaceae	Ruminiclostridium	Ruminiclostridium hungatei
647000573574	55596858699	16743215304	33205604593	0.000898369	0.0369454245	Bacteria	Firmicutes	Bacilli	Lactobacillales	Lactobacillaceae	Lactobacillus	Lactobacillus salivarius
389797587475	-31231815306	0.9361147792	-33363232801	0.0008489438	0.0369454245	Bacteria	Firmicutes	Erysipelotrichia	Erysipelotrichales	Erysipelotrichaceae	Erysipelatoclostridium	innocuum
91949617585	3509788106	10818612407	32442128195	0.0011777571	0.0430535663	Bacteria	Firmicutes	Clostridia	Clostridiales	Eubacteriaceae	Eubacterium	Eubacterium ruminantium
146389368132	58025299252	18389442906	3155359276	0.0016030058	0.0479444448	Bacteria	Proteobacteria	Alphaproteobacteria	Rhodospirillales	Rhodospirillaceae	Rhodospirillum	Rhodospirillum rubrum
394765981726	3652690948	11532598271	31672749387	0.0015387476	0.0479444448	Bacteria	Firmicutes	Bacilli	Lactobacillales	Streptococcaceae	Streptococcus	Streptococcus mutans
87415246076	30398609908	10292627057	29534354775	0.003142583	0.0795315226	Bacteria	Firmicutes	Clostridia	Clostridiales	Clostridiaceae	Clostridium	Clostridium saudiense
53565157854	-23804559395	0.8011036777	-29714704924	0.0029637735	0.0795315226	Bacteria	Firmicutes	Bacilli	Lactobacillales	Carnobacteriaceae	Granulicatella	Granulicatella adiacens
133636181405	59176090192	20695729978	28593381463	0.0042452599	0.0997636082	Bacteria	Actinobacteria	Coriobacteriia	Coriobacteriales	Coriobacteriaceae	Enorma	Enorma timonensis
3276431511476	29200879017	10481271105	27860055067	0.0053361965	0.117040577	Bacteria	Bacteroidetes	Bacteroidia	Bacteroidales	Bacteroidaceae	Bacteroides	Bacteroides stercoris
54684319298	24552555601	0.9198067536	26693167346	0.0076005738	0.1562867998	Bacteria	Firmicutes	Clostridia	Clostridiales	Ruminococcaceae	Acetivibrio	Acetivibrio ethanolgignens
4079026671082	23608054805	0.897451014	26305675113	0.0085242437	0.1619846242	Bacteria	Bacteroidetes	Bacteroidia	Bacteroidales	Tannerellaceae	Parabacteroides	Parabacteroides merdae
103334004166	19019302586	0.7266715235	2617317725	0.0088623807	0.1619846242	Bacteria	Firmicutes	Clostridia	Clostridiales	Lachnospiraceae	Blautia	gnavus
57694613813	19267468996	0.7761142624	24825557176	0.0130443666	0.2258735061	Bacteria	Firmicutes	Clostridia	Clostridiales	Ruminococcaceae	Subdoligranulum	Subdoligranulum variabile
937355278573	-17000631343	0.7163315048	-23732910292	0.0176303662	0.2788987164	Bacteria	Firmicutes	Clostridia	Clostridiales	Ruminococcaceae	Flavonifractor	Flavonifractor plautii
30762887971	-54551022973	23020126774	-23697099286	0.0178020457	0.2788987164	Bacteria	Proteobacteria	Gammaproteobacteria	Enterobacterales	Enterobacteriaceae	Kluyvera	Kluyvera cryocrescens
2501253538	-54054436714	23081008545	-23419443136	0.0191835769	0.2868816734	Bacteria	Firmicutes	Clostridia	Clostridiales	Lachnospiraceae	Lachnoclostridium	citroniae
679420342426	15479034104	0.6708193496	23074817556	0.0210279782	0.3007915139	Bacteria	Firmicutes	Clostridia	Clostridiales	Lachnospiraceae	Roseburia	Roseburia intestinalis
344335676167	28732537374	12705566702	22614132882	0.0237336767	0.312335185	Bacteria	Firmicutes	Bacilli	Lactobacillales	Lactobacillaceae	Lactobacillus	Lactobacillus reuteri
32700213392	-19025119011	0.840045711	-22647718763	0.0235266821	0.312335185	Bacteria	Firmicutes	Clostridia	Clostridiales	Lachnospiraceae	Agathobacter	Agathobacter ruminis
570465413397	34792065679	16429584281	21176473539	0.0342049446	0.3284140687	Bacteria	Firmicutes	Negativicutes	Acidaminococcales	Acidaminococcaceae	Acidaminococcus	Acidaminococcus intestini
83943578861	36540892786	16562281126	22062717393	0.0273649789	0.3284140687	Bacteria	Proteobacteria	Gammaproteobacteria	Enterobacterales	Enterobacteriaceae	Klebsiella	Klebsiella variicola
34889530256	36724811127	16889917368	21743629839	0.0296778857	0.3284140687	Bacteria	Proteobacteria	Gammaproteobacteria	Enterobacterales	Enterobacteriaceae	Klebsiella	Klebsiella pneumoniae;Klebsiella pneumoniae subsp. ozaenae
31655097988	15116605042	0.7131436255	2119713968	0.0340301743	0.3284140687	Bacteria	Bacteroidetes	Bacteroidia	Bacteroidales	Bacteroidaceae	Bacteroides	Bacteroides finegoldii
245467817249	23994118676	11263480696	21302578949	0.0331503277	0.3284140687	Bacteria	Bacteroidetes	Bacteroidia	Bacteroidales	Rikenellaceae	Alistipes	Alistipes indistinctus
326302777175	-24639023261	11415738911	-21583380149	0.0309015612	0.3284140687	Bacteria	Firmicutes	Clostridia	Clostridiales	Lachnospiraceae	Lachnoclostridium	scindens
31517364533	32938963018	15547650828	2118581346	0.0341258636	0.3284140687	Bacteria	Firmicutes	Clostridia	Clostridiales	Clostridiales Family XIII. Incertae Sedis	Mogibacterium	Mogibacterium neglectum
167943948866	21873914411	10021469449	2182705293	0.0290575199	0.3284140687	Bacteria	Firmicutes	Clostridia	Clostridiales	Ruminococcaceae	Ruminococcus	Ruminococcus albus
114340992779	13803950049	0.626285896	22040972242	0.0275175073	0.3284140687	Bacteria	Firmicutes	Clostridia	Clostridiales	Christensenellaceae	Christensenella	Christensenella minuta
27925792454	19101465837	0.905677584	21090801158	0.0349376669	0.3284140687	Bacteria	Firmicutes	Clostridia	Clostridiales	Lachnospiraceae	Herbinix	Herbinix luporum
51019374003	20703983315	0.9909759481	20892518485	0.0366850584	0.3352606724	Bacteria	Bacteroidetes	Bacteroidia	Bacteroidales	Bacteroidaceae	Bacteroides	Bacteroides timonensis
3445327103504	10760745816	0.5262278541	20448833583	0.040866359	0.3549368716	Bacteria	Firmicutes	Clostridia	Clostridiales	Lachnospiraceae	Blautia	Blautia faecis
150649650873	-17747374868	0.8684482912	-20435730079	0.0409957481	0.3549368716	Bacteria	Bacteroidetes	Bacteroidia	Bacteroidales	Bacteroidaceae	Bacteroides	Bacteroides salyersiae
48321701519	44139531514	21870630143	20182103225	0.0435693616	0.3675466654	Bacteria	Bacteroidetes	Bacteroidia	Bacteroidales	Prevotellaceae	Prevotella	Prevotella shahii
1319055088444	17594946569	0.8794052324	20007780169	0.0454163175	0.3735492112	Bacteria	Bacteroidetes	Bacteroidia	Bacteroidales	Rikenellaceae	Alistipes	Alistipes onderdonkii
70608011527	32045823727	16333269962	19619968201	0.0497628545	0.3898090267	Bacteria	Bacteroidetes	Bacteroidia	Bacteroidales	Tannerellaceae	Parabacteroides	Parabacteroides goldsteinii
109507597798	21182500896	10792221441	19627563253	0.0496744949	0.3898090267	Bacteria	Bacteroidetes	Bacteroidia	Bacteroidales	Bacteroidaceae	Bacteroides	Bacteroides clarus
90716736614	36795606111	18962539924	19404365796	0.0523266547	0.3969446706	Bacteria	Firmicutes	Bacilli	Lactobacillales	Lactobacillaceae	Lactobacillus	Lactobacillus mucosae
891497816133	15285153508	0.7902514267	19342139718	0.0530868252	0.3969446706	Bacteria	Bacteroidetes	Bacteroidia	Bacteroidales	Bacteroidaceae	Bacteroides	Bacteroides kribbi
219903421986	41247165924	22457647157	18366646175	0.0662594217	0.4450502234	Bacteria	Bacteroidetes	Bacteroidia	Bacteroidales	Prevotellaceae	Prevotella	Prevotella oralis
292449724112	16850130486	0.9172300156	18370670606	0.0661999961	0.4450502234	Bacteria	Actinobacteria	Coriobacteriia	Eggerthellales	Eggerthellaceae	Adlercreutzia	Adlercreutzia equolifaciens
2285211569	34509006744	18596835332	1855638668	0.0635050782	0.4450502234	Bacteria	Proteobacteria	Gammaproteobacteria	Enterobacterales	Enterobacteriaceae	Raoultella	Raoultella planticola
52481838096	23370141261	12583129505	18572598534	0.0632741932	0.4450502234	Bacteria	Firmicutes	Bacilli	Lactobacillales	Lactobacillaceae	Lactobacillus	Lactobacillus rhamnosus
67515836628	-18704945534	10185117636	-18364977414	0.0662840758	0.4450502234	Bacteria	Firmicutes	Clostridia	Clostridiales	Lachnospiraceae	Lachnoclostridium	aldenense
93711053225	-17179690526	0.9505499334	-18073422472	0.0707089327	0.4639342102	Bacteria	Firmicutes	Negativicutes	Veillonellales	Veillonellaceae	Veillonella	Veillonella dispar
93436902717	-14277215241	0.7933354854	-17996440981	0.0719168533	0.4639342102	Bacteria	Firmicutes	Clostridia	Clostridiales	Clostridiales Family XIII. Incertae Sedis	Emergencia	Emergencia timonensis
6129446817993	-19955682408	11645611833	-17135795607	0.08660597	0.4748673067	Bacteria	Firmicutes	Erysipelotrichia	Erysipelotrichales	Erysipelotrichaceae	Erysipelatoclostridium	spiroforme
2907871298771	17117055048	0.997840657	17154096625	0.0862701451	0.4748673067	Bacteria	Actinobacteria	Actinobacteria	Bifidobacteriales	Bifidobacteriaceae	Bifidobacterium	Bifidobacterium longum
2268205205185	13261334787	0.7576211177	17503913865	0.0800508013	0.4748673067	Bacteria	Firmicutes	Clostridia	Clostridiales	Eubacteriaceae	Eubacterium	eligens
178201733745	1447135043	0.830830426	17417935089	0.0815445829	0.4748673067	Bacteria	Bacteroidetes	Bacteroidia	Bacteroidales	Rikenellaceae	Alistipes	Alistipes finegoldii
54044483947	53907831679	31452721007	17139322117	0.0865411763	0.4748673067	Bacteria	Firmicutes	Bacilli	Lactobacillales	Streptococcaceae	Lactococcus	Lactococcus garvieae;Lactococcus garvieae subsp. bovis
200341025851	-10322143965	0.583586675	-17687422293	0.0769369015	0.4748673067	Bacteria	Firmicutes	Clostridia	Clostridiales	Clostridiales Family XIII. Incertae Sedis	Aminipila	Aminipila butyrica
28337766652	17480557486	10160627428	17204210675	0.0853559302	0.4748673067	Bacteria	Bacteroidetes	Bacteroidia	Bacteroidales	Bacteroidaceae	Bacteroides	Bacteroides oleiciplenus
175242749195	10307576584	0.6042663871	17058000914	0.0880453061	0.4748673067	Bacteria	Firmicutes	Clostridia	Clostridiales	Lachnospiraceae	Merdimonas	Merdimonas faecis
43040424193	-15229395255	0.8759587516	-17385973058	0.0821056208	0.4748673067	Bacteria	Actinobacteria	Coriobacteriia	Coriobacteriales	Atopobiaceae	Atopobium	Atopobium parvulum
25409620412	16652038958	0.9441844045	17636426612	0.0777921604	0.4748673067	Bacteria	Firmicutes	Clostridia	Clostridiales	Lachnospiraceae	Caecibacterium	Caecibacterium sporoformans
33528024229655	-0.9771620477	0.607669617	-16080482227	0.1078246178	0.4898386711	Bacteria	Firmicutes	Clostridia	Clostridiales	Ruminococcaceae	Faecalibacterium	Faecalibacterium prausnitzii
18814951717831	-10189014742	0.621283974	-16399931704	0.101006587	0.4898386711	Bacteria	Firmicutes	Clostridia	Clostridiales	Lachnospiraceae	Blautia	Blautia wexlerae
5928478612045	12455990382	0.7707228995	16161438035	0.1060632255	0.4898386711	Bacteria	Bacteroidetes	Bacteroidia	Bacteroidales	Tannerellaceae	Parabacteroides	Parabacteroides distasonis
2909349664328	0.9294460954	0.5768930852	16111236541	0.1071527737	0.4898386711	Bacteria	Firmicutes	Clostridia	Clostridiales	Ruminococcaceae	Unclassified	Unclassified
959249641946	12741183094	0.7746041035	16448638777	0.0999978856	0.4898386711	Bacteria	Bacteroidetes	Bacteroidia	Bacteroidales	Bacteroidaceae	Bacteroides	Bacteroides faecis
38993012166	23383606647	14760760323	15841735883	0.1131542219	0.4898386711	Archaea	Euryarchaeota	Methanobacteria	Methanobacteriales	Methanobacteriaceae	Methanobrevibacter	Methanobrevibacter smithii
58710074963	46955518169	2956835565	15880327849	0.1122789258	0.4898386711	Bacteria	Firmicutes	Erysipelotrichia	Erysipelotrichales	Erysipelotrichaceae	Faecalitalea	Faecalitalea cylindroides
823366234537	16112734963	10088929298	15970708573	0.1102499134	0.4898386711	Bacteria	Proteobacteria	Deltaproteobacteria	Desulfovibrionales	Desulfovibrionaceae	Desulfovibrio	Desulfovibrio simplex
38147231451	15969527046	0.9646697494	16554398079	0.0978353167	0.4898386711	Bacteria	Firmicutes	Clostridia	Clostridiales	Ruminococcaceae	Acetanaerobacterium	Acetanaerobacterium elongatum
264636173998	0.7525717817	0.4730862012	15907709415	0.1116611348	0.4898386711	Bacteria	Firmicutes	Clostridia	Clostridiales	Lachnospiraceae	Lachnoclostridium	clostridioforme
408388968247	15575301642	0.9355842051	16647674851	0.0959591532	0.4898386711	Bacteria	Bacteroidetes	Bacteroidia	Bacteroidales	Odoribacteraceae	Butyricimonas	Butyricimonas faecihominis
103257501463	-19820405758	12118843373	-16355030879	0.1019436279	0.4898386711	Bacteria	Firmicutes	Bacilli	Lactobacillales	Streptococcaceae	Streptococcus	Streptococcus gordonii
32676043001	-21737978823	13125485879	-16561656477	0.0976882779	0.4898386711	Bacteria	Firmicutes	Bacilli	Lactobacillales	Streptococcaceae	Streptococcus	Streptococcus equinus
8350413619	-15674952516	0.9595189599	-16336261368	0.1023373763	0.4898386711	Bacteria	Firmicutes	Clostridia	Clostridiales	Lachnospiraceae	Lachnoclostridium	asparagiforme
27329585815	12664125854	0.7814895887	16205111413	0.105122523	0.4898386711	Bacteria	Bacteroidetes	Bacteroidia	Bacteroidales	Bacteroidaceae	Bacteroides	Bacteroides barnesiae
105682922964	-15678707116	10018484248	-15649779675	0.1175880755	0.4971713204	Bacteria	Firmicutes	Clostridia	Clostridiales	Clostridiaceae	Butyricicoccus	Butyricicoccus pullicaecorum
111329786241	-17361582563	11102352924	-15637750558	0.1178704042	0.4971713204	Bacteria	Proteobacteria	Gammaproteobacteria	Enterobacterales	Enterobacteriaceae	Shigella	Shigella dysenteriae
36562784052994	0.9155846368	0.6139687196	14912561625	0.1358942535	0.5080591978	Bacteria	Bacteroidetes	Bacteroidia	Bacteroidales	Bacteroidaceae	Bacteroides	Bacteroides vulgatus
8688493973266	-0.907987197	0.5935345365	-15297967367	0.1260670496	0.5080591978	Bacteria	Firmicutes	Clostridia	Clostridiales	Lachnospiraceae	Anaerobutyricum	Anaerobutyricum hallii
876543085393	-0.9461468785	0.6296839633	-15025742017	0.1329488802	0.5080591978	Bacteria	Bacteroidetes	Bacteroidia	Bacteroidales	Bacteroidaceae	Bacteroides	Bacteroides xylanisolvens
26486903157	37345016465	24226382079	15415020015	0.1231946562	0.5080591978	Bacteria	Bacteroidetes	Bacteroidia	Bacteroidales	Rikenellaceae	Tidjanibacter	Tidjanibacter massiliensis
176416042192	20750670309	13604095835	1525325208	0.1271780033	0.5080591978	Bacteria	Firmicutes	Erysipelotrichia	Erysipelotrichales	Erysipelotrichaceae	Coprobacillus	Coprobacillus cateniformis
378857311556	-2221747866	14624858445	-15191585439	0.1287225935	0.5080591978	Bacteria	Firmicutes	Bacilli	Lactobacillales	Streptococcaceae	Lactococcus	Lactococcus lactis;Lactococcus lactis subsp. cremoris
119453175536	12799565721	0.8502626595	15053660862	0.1322299832	0.5080591978	Bacteria	Actinobacteria	Actinobacteria	Bifidobacteriales	Bifidobacteriaceae	Bifidobacterium	Bifidobacterium longum;Bifidobacterium longum subsp. suillum
89507975081	10804654428	0.7073998989	15273757383	0.1266676059	0.5080591978	Bacteria	Firmicutes	Clostridia	Clostridiales	Ruminococcaceae	Pseudoflavonifractor	Pseudoflavonifractor capillosus
38577041648	-43444639647	29035016666	-14962843021	0.1345795841	0.5080591978	Bacteria	Firmicutes	Erysipelotrichia	Erysipelotrichales	Erysipelotrichaceae	Breznakia	Breznakia pachnodae
46114282264	12038781075	0.8015767993	15018874157	0.1331261872	0.5080591978	Bacteria	Bacteroidetes	Bacteroidia	Bacteroidales	Bacteroidaceae	Bacteroides	Bacteroides intestinalis
37727346483	18559617802	12526617072	14816145248	0.138442892	0.511772039	Bacteria	Firmicutes	Clostridia	Clostridiales	Defluviitaleaceae	Defluviitalea	Defluviitalea raffinosedens
6114464543119	17567271561	11914045113	14745010108	0.1403467458	0.5130453262	Bacteria	Bacteroidetes	Bacteroidia	Bacteroidales	Bacteroidaceae	Bacteroides	Bacteroides plebeius
23977087334	-28152578264	1929093291	-14593684191	0.1444637333	0.5222919589	Bacteria	Actinobacteria	Coriobacteriia	Coriobacteriales	Atopobiaceae	Olsenella	Olsenella uli
65293521123	21939859366	15114788217	14515492411	0.1466269811	0.5243508347	Bacteria	Proteobacteria	Alphaproteobacteria	Kiloniellales	Kiloniellaceae	Kiloniella	Kiloniella antarctica
252798743033	15263170271	10608360367	14387869325	0.1502108999	0.531391248	Bacteria	Firmicutes	Erysipelotrichia	Erysipelotrichales	Erysipelotrichaceae	Erysipelatoclostridium	Erysipelatoclostridium ramosum
4221023832246	15981749349	11174419553	14302084572	0.1526571989	0.534300196	Bacteria	Firmicutes	Clostridia	Clostridiales	Ruminococcaceae	Ruminococcus	Ruminococcus champanellensis
3440624490893	-11302748581	0.802744104	-1408013902	0.1591269535	0.5453413303	Bacteria	Firmicutes	Clostridia	Clostridiales	Lachnospiraceae	Blautia	torques
1825186836174	-0.9531443141	0.6746113385	-14128791789	0.1576912521	0.5453413303	Bacteria	Bacteroidetes	Bacteroidia	Bacteroidales	Bacteroidaceae	Bacteroides	Bacteroides thetaiotaomicron
33934821618	21404083471	15465252394	13840112612	0.1663550066	0.5642350223	Bacteria	Bacteroidetes	Bacteroidia	Bacteroidales	Rikenellaceae	Alistipes	Alistipes timonensis
182715752709	-0.7525094083	0.546581665	-13767556734	0.1685877996	0.5659733272	Bacteria	Firmicutes	Clostridia	Clostridiales	Lachnospiraceae	Faecalicatena	Faecalicatena orotica
146202184626	12904282498	0.9477885306	13615149458	0.1733510137	0.5760856918	Bacteria	Firmicutes	Bacilli	Lactobacillales	Lactobacillaceae	Lactobacillus	Lactobacillus gasseri
11540915393457	0.9248573918	0.6914145267	13376308366	0.1810168071	0.5818003197	Bacteria	Firmicutes	Clostridia	Clostridiales	Ruminococcaceae	Gemmiger	Gemmiger formicilis
717724836111	14487053419	10805102159	13407604301	0.1799982473	0.5818003197	Bacteria	Firmicutes	Erysipelotrichia	Erysipelotrichales	Erysipelotrichaceae	Turicibacter	Turicibacter sanguinis
430422214237	-11518111581	0.8540389791	-13486634524	0.1774450897	0.5818003197	Bacteria	Firmicutes	Bacilli	Lactobacillales	Streptococcaceae	Streptococcus	Streptococcus oralis;Streptococcus oralis subsp. dentisani
49296814218	2736112001	20507784731	13341821347	0.182144173	0.5818003197	Bacteria	Firmicutes	Bacilli	Lactobacillales	Lactobacillaceae	Lactobacillus	Lactobacillus oris
25771809665	28765228686	21978138854	13088109451	0.1905983985	0.6029507029	Bacteria	Synergistetes	Synergistia	Synergistales	Synergistaceae	Cloacibacillus	Cloacibacillus porcorum
30777346105	22018869505	17010121678	12944569076	0.1955076448	0.6125906205	Bacteria	Firmicutes	Clostridia	Clostridiales	Peptostreptococcaceae	Terrisporobacter	Terrisporobacter petrolearius
475693781057	18592543967	1471221896	12637484541	0.2063203277	0.6303647229	Bacteria	Firmicutes	Negativicutes	Acidaminococcales	Acidaminococcaceae	Phascolarctobacterium	Phascolarctobacterium faecium
23057269902	-0.6013047402	0.4804757898	-12514777081	0.2107602417	0.6303647229	Bacteria	Firmicutes	Clostridia	Clostridiales	Ruminococcaceae	Pseudoflavonifractor	Pseudoflavonifractor phocaeensis
47900015416	22965680913	18269084823	12570788923	0.2087250695	0.6303647229	Bacteria	Bacteroidetes	Bacteroidia	Bacteroidales	Porphyromonadaceae	Porphyromonas	Porphyromonas gulae
54324885235	0.6192098995	0.490422762	12626043233	0.2067314134	0.6303647229	Bacteria	Firmicutes	Clostridia	Clostridiales	Lachnospiraceae	Lachnoclostridium	polysaccharolyticum
23777354123	30367359908	24226102	12534975667	0.2100246841	0.6303647229	Bacteria	Actinobacteria	Actinobacteria	Bifidobacteriales	Bifidobacteriaceae	Alloscardovia	Alloscardovia omnicolens
421191619892	12247065407	0.9923795322	12341110442	0.2171615287	0.6436589454	Bacteria	Bacteroidetes	Bacteroidia	Bacteroidales	Rikenellaceae	Alistipes	Alistipes obesi
153272361139	1595121425	13080440679	12194707076	0.2226655872	0.6499436569	Bacteria	Firmicutes	Bacilli	Lactobacillales	Lactobacillaceae	Lactobacillus	Lactobacillus sakei
49477274061	12897923955	10589633413	12179764353	0.2232329277	0.6499436569	Bacteria	Firmicutes	Bacilli	Lactobacillales	Streptococcaceae	Streptococcus	Streptococcus peroris
19256356300769	10102807943	0.855254563	11812632613	0.2374981572	0.6579719864	Bacteria	Actinobacteria	Coriobacteriia	Coriobacteriales	Coriobacteriaceae	Collinsella	Collinsella aerofaciens
1449744903081	11222146059	0.9632143251	11650725873	0.243989612	0.6579719864	Bacteria	Actinobacteria	Coriobacteriia	Eggerthellales	Eggerthellaceae	Eggerthella	Eggerthella lenta
32287466933	12590715536	10770550407	11689946251	0.2424057969	0.6579719864	Bacteria	Bacteroidetes	Bacteroidia	Bacteroidales	Prevotellaceae	Prevotella	Prevotella stercorea
512707647779	0.6177143303	0.5281922056	11694877808	0.2422071615	0.6579719864	Bacteria	Firmicutes	Clostridia	Clostridiales	Lachnospiraceae	Hespellia	Hespellia porcina
137427157773	18603302528	15631763177	11900962366	0.2340085693	0.6579719864	Bacteria	Proteobacteria	Gammaproteobacteria	Enterobacterales	Enterobacteriaceae	Enterobacter	Enterobacter cloacae
489715063894	0.8252067129	0.7003781635	11782302131	0.2387048407	0.6579719864	Bacteria	Firmicutes	Clostridia	Clostridiales	Ruminococcaceae	Ruthenibacterium	Ruthenibacterium lactatiformans
28504812531	13883318196	11666806075	11899844831	0.2340524909	0.6579719864	Bacteria	Actinobacteria	Actinobacteria	Micrococcales	Micrococcaceae	Rothia	Rothia dentocariosa
22377502083	-16894048186	14293788542	-11819153569	0.2372392879	0.6579719864	Bacteria	Firmicutes	Bacilli	Lactobacillales	Streptococcaceae	Streptococcus	Streptococcus constellatus;Streptococcus constellatus subsp. pharyngis
46477131292	32315656078	2695987553	11986574657	0.2306611634	0.6579719864	Bacteria	Firmicutes	Clostridia	Clostridiales	Lachnospiraceae	Faecalicatena	Faecalicatena fissicatena
24382206822	-12839823891	11078614384	-11589738071	0.2464668618	0.6592487605	Bacteria	Firmicutes	Erysipelotrichia	Erysipelotrichales	Erysipelotrichaceae	Solobacterium	Solobacterium moorei
88644426346	0.8538077282	0.7403502293	11532484147	0.2488084368	0.6601449653	Bacteria	Firmicutes	Clostridia	Clostridiales	Ruminococcaceae	Paludicola	Paludicola psychrotolerans
79276377234	-0.7671367042	0.6752167107	-11361340619	0.2559004615	0.6716944089	Bacteria	Firmicutes	Clostridia	Clostridiales	Ruminococcaceae	Anaerotruncus	Anaerotruncus colihominis
58814686542	-0.8535474581	0.7533998412	-1132927579	0.2572446673	0.6716944089	Bacteria	Firmicutes	Clostridia	Clostridiales	Ruminococcaceae	Fournierella	Fournierella massiliensis
543799678936	-11577840019	10563633329	-10960092667	0.2730747192	0.7074140363	Bacteria	Bacteroidetes	Bacteroidia	Bacteroidales	Tannerellaceae	Parabacteroides	Parabacteroides johnsonii
28352935235	19007217724	17623172709	1078535519	0.2807948396	0.7217304861	Bacteria	Bacteroidetes	Bacteroidia	Bacteroidales	Barnesiellaceae	Coprobacter	Coprobacter secundus
79152274527	14297767648	13343505647	10715150895	0.2839378896	0.7241516719	Bacteria	Firmicutes	Clostridia	Clostridiales	Ruminococcaceae	Ruminococcus	Ruminococcus callidus
741122083923	-0.8169914605	0.7837425642	-10424232366	0.297215498	0.7352172845	Bacteria	Firmicutes	Clostridia	Clostridiales	Ruminococcaceae	Neglecta	Neglecta timonensis
25582061044	1280396517	12158921026	10530511008	0.2923175724	0.7352172845	Bacteria	Firmicutes	Clostridia	Clostridiales	Lachnospiraceae	Parasporobacterium	Parasporobacterium paucivorans
1173688518	0.7215281271	0.6918824707	10428478213	0.2970187791	0.7352172845	Bacteria	Firmicutes	Clostridia	Clostridiales	Clostridiaceae	Lutispora	Lutispora thermophila
2393054609	13577883876	13004839796	10440639092	0.2964558223	0.7352172845	Bacteria	Bacteroidetes	Bacteroidia	Bacteroidales	Bacteroidaceae	Bacteroides	Bacteroides mediterraneensis
4472185413764	0.4888356818	0.5134797978	0.9520056755	0.3410941035	0.7559989606	Bacteria	Firmicutes	Clostridia	Clostridiales	Oscillospiraceae	Oscillibacter	Oscillibacter ruminantium
1443168226597	-0.7486327472	0.8036501405	-0.9315406164	0.3515739847	0.7559989606	Bacteria	Bacteroidetes	Bacteroidia	Bacteroidales	Bacteroidaceae	Bacteroides	Bacteroides xylanolyticus
451830897404	10310310175	10436750725	0.9878850657	0.3232089403	0.7559989606	Bacteria	Firmicutes	Clostridia	Clostridiales	Gracilibacteraceae	Gracilibacter	Gracilibacter thermotolerans
111109427214	12459168656	13163613095	0.9464854798	0.3439010248	0.7559989606	Bacteria	Proteobacteria	Gammaproteobacteria	Pasteurellales	Pasteurellaceae	Haemophilus	Haemophilus parainfluenzae
204400507366	-0.8690118635	0.878232832	-0.9895005422	0.3224183047	0.7559989606	Bacteria	Firmicutes	Clostridia	Clostridiales	Lachnospiraceae	Blautia	Blautia caecimuris
97969207984	-0.8855224057	0.9101089178	-0.9729850882	0.3305607134	0.7559989606	Bacteria	Firmicutes	Bacilli	Lactobacillales	Streptococcaceae	Streptococcus	Streptococcus anginosus;Streptococcus anginosus subsp. whileyi
145167782333	18733956888	18801426214	0.9964114783	0.3190502582	0.7559989606	Bacteria	Actinobacteria	Coriobacteriia	Eggerthellales	Eggerthellaceae	Adlercreutzia	Adlercreutzia muris
657957503248	0.644040783	0.6583627333	0.9782461103	0.3279526159	0.7559989606	Bacteria	Firmicutes	Clostridia	Clostridiales	Clostridiales Family XIII. Incertae Sedis	Ihubacter	Ihubacter massiliensis
9829200889	2380047856	23519738154	10119363746	0.3115684759	0.7559989606	Bacteria	Proteobacteria	Deltaproteobacteria	Desulfovibrionales	Desulfovibrionaceae	Desulfovibrio	Desulfovibrio piger
29088487021	17065521152	17332622649	0.9845896664	0.3248256676	0.7559989606	Bacteria	Firmicutes	Bacilli	Lactobacillales	Lactobacillaceae	Lactobacillus	Lactobacillus delbrueckii;Lactobacillus delbrueckii subsp. bulgaricus
73046155037	19074707238	19394618056	0.9835051756	0.3253588693	0.7559989606	Bacteria	Firmicutes	Negativicutes	Veillonellales	Veillonellaceae	Allisonella	Allisonella histaminiformans
114573402871	0.6791361192	0.7270509612	0.9340969964	0.3502538612	0.7559989606	Bacteria	Firmicutes	Clostridia	Clostridiales	Ruminococcaceae	Acutalibacter	Acutalibacter muris
209998849506	-0.6837646384	0.7126545879	-0.9594614978	0.337326307	0.7559989606	Bacteria	Firmicutes	Clostridia	Clostridiales	Lachnospiraceae	Lachnoclostridium	xylanolyticum
3795077593	-0.756985352	0.7897791085	-0.9584773057	0.3378221298	0.7559989606	Bacteria	Firmicutes	Bacilli	Bacillales	Unclassified	Unclassified	Unclassified
19160985426	-0.4923530738	0.4905897206	-1003594354	0.3155741771	0.7559989606	Bacteria	Firmicutes	Clostridia	Clostridiales	Ruminococcaceae	Anaeromassilibacillus	Anaeromassilibacillus senegalensis
40396169094	17029758116	17219395241	0.9889870043	0.3226695	0.7559989606	Bacteria	Firmicutes	Negativicutes	Veillonellales	Veillonellaceae	Veillonella	Veillonella parvula
67177248876	-16917963236	17906946549	-0.9447709686	0.3447758163	0.7559989606	Bacteria	Firmicutes	Bacilli	Lactobacillales	Enterococcaceae	Enterococcus	Enterococcus saigonensis
39045842212	0.7529499805	0.7987711705	0.9426353984	0.3458674272	0.7559989606	Bacteria	Firmicutes	Clostridia	Clostridiales	Lachnospiraceae	Muricomes	Muricomes intestini
30867511504	-0.9405673333	10065362389	-0.9344594829	0.3500669267	0.7559989606	Bacteria	Firmicutes	Bacilli	Lactobacillales	Streptococcaceae	Streptococcus	Streptococcus anginosus
26749302441	14798731413	1564710276	0.9457809308	0.3442603337	0.7559989606	Bacteria	Actinobacteria	Actinobacteria	Bifidobacteriales	Bifidobacteriaceae	Bifidobacterium	Bifidobacterium pullorum
2940025342344	0.8804369448	0.9875619845	0.8915257561	0.3726471803	0.7740771975	Bacteria	Bacteroidetes	Bacteroidia	Bacteroidales	Barnesiellaceae	Barnesiella	Barnesiella intestinihominis
686884815583	19815542949	21878602974	0.9057042158	0.3650924305	0.7740771975	Bacteria	Bacteroidetes	Bacteroidia	Bacteroidales	Porphyromonadaceae	Porphyromonas	Porphyromonas pogonae
24785278546	1976905606	22351693814	0.8844544948	0.3764509167	0.7740771975	Bacteria	Proteobacteria	Alphaproteobacteria	Rhodospirillales	Rhodospirillaceae	Novispirillum	Novispirillum itersonii
308137444999	0.6470538005	0.7234079333	0.8944521766	0.3710800064	0.7740771975	Bacteria	Firmicutes	Clostridia	Clostridiales	Lachnospiraceae	Anaerotaenia	Anaerotaenia torta
187911754767	0.8848167474	0.9882379241	0.8953478974	0.3706011435	0.7740771975	Bacteria	Actinobacteria	Actinobacteria	Bifidobacteriales	Bifidobacteriaceae	Bifidobacterium	Bifidobacterium dentium
44877783648	-0.8962630786	0.9991276621	-0.8970456054	0.3696945821	0.7740771975	Bacteria	Firmicutes	Clostridia	Clostridiales	Clostridiaceae	Lactonifactor	Lactonifactor longoviformis
26050697286	-21274044984	24036695616	-0.8850652903	0.3761214185	0.7740771975	Bacteria	Bacteroidetes	Bacteroidia	Bacteroidales	Tannerellaceae	Parabacteroides	Parabacteroides faecis
33610977052	11846958222	13701734424	0.8646320134	0.3872407957	0.7768428157	Bacteria	Firmicutes	Negativicutes	Veillonellales	Veillonellaceae	Veillonella	Veillonella atypica
47861733201	-10588250954	12184340622	-0.8690048385	0.3848444843	0.7768428157	Bacteria	Firmicutes	Erysipelotrichia	Erysipelotrichales	Erysipelotrichaceae	Massilimicrobiota	Massilimicrobiota timonensis
25307365306	0.9891348118	11369903282	0.8699588617	0.3843228862	0.7768428157	Bacteria	Bacteroidetes	Bacteroidia	Bacteroidales	Bacteroidaceae	Bacteroides	Bacteroides sartorii
39721410917	13256276949	15263823694	0.8684768126	0.3851333606	0.7768428157	Bacteria	Firmicutes	Bacilli	Lactobacillales	Streptococcaceae	Streptococcus	Streptococcus hongkongensis
3176377220834	-14786533766	17258747364	-0.8567559078	0.3915797982	0.7807863856	Bacteria	Firmicutes	Negativicutes	Veillonellales	Veillonellaceae	Dialister	Dialister invisus
231449336842	-0.8328771752	0.9819325221	-0.8482020469	0.3963254575	0.7854884067	Bacteria	Proteobacteria	Gammaproteobacteria	Enterobacterales	Enterobacteriaceae	Escherichia	Escherichia marmotae
48475674978	-0.7232079476	0.8600070678	-0.8409325628	0.4003857149	0.7887838336	Bacteria	Firmicutes	Bacilli	Lactobacillales	Streptococcaceae	Streptococcus	Streptococcus vestibularis
2413405330066	0.4224655338	0.5218357451	0.8095756907	0.4181840842	0.798431087	Bacteria	Firmicutes	Clostridia	Clostridiales	Lachnospiraceae	Coprococcus	Coprococcus comes
1261711968871	0.6365765466	0.7710522179	0.8255945989	0.4090341	0.798431087	Bacteria	Firmicutes	Clostridia	Clostridiales	Hungateiclostridiaceae	Hungateiclostridium	Hungateiclostridium thermocellum
62317070482	-0.8234269228	10124275387	-0.8133193649	0.4160349772	0.798431087	Bacteria	Firmicutes	Clostridia	Clostridiales	Lachnospiraceae	Frisingicoccus	Frisingicoccus caecimuris
31045116979	-1119654691	13879573418	-0.8066924373	0.4198437023	0.798431087	Bacteria	Firmicutes	Clostridia	Clostridiales	Lachnospiraceae	Lachnoclostridium	symbiosum
164787630164	0.3652485089	0.4464812232	0.8180601778	0.4133228261	0.798431087	Bacteria	Firmicutes	Clostridia	Clostridiales	Lachnospiraceae	Blautia	Blautia glucerasea
43053683901	0.5792099228	0.7094453072	0.816426463	0.4142562665	0.798431087	Bacteria	Bacteroidetes	Bacteroidia	Bacteroidales	Bacteroidaceae	Bacteroides	Bacteroides paurosaccharolyticus
499236386567	-0.9122212392	11437200173	-0.7975913907	0.4251076487	0.7992023795	Bacteria	Firmicutes	Clostridia	Clostridiales	Clostridiaceae	Anoxynatronum	Anoxynatronum buryatiense
163229013572	0.7201678372	0.9021400299	0.7982883071	0.424703202	0.7992023795	Bacteria	Firmicutes	Bacilli	Lactobacillales	Streptococcaceae	Streptococcus	Streptococcus parasanguinis
23727003709	-10474313546	13300609522	-0.7875062815	0.4309855527	0.8012330299	Bacteria	Proteobacteria	Alphaproteobacteria	Rhodospirillales	Rhodospirillaceae	Aestuariispira	Aestuariispira insulae
133449577897	-0.8249888776	10477624194	-0.7873816261	0.4310584994	0.8012330299	Bacteria	Proteobacteria	Deltaproteobacteria	Desulfovibrionales	Desulfovibrionaceae	Desulfovibrio	Desulfovibrio intestinalis
1040267216841	-0.866323375	11264779699	-0.7690548756	0.4418607345	0.8166976498	Bacteria	Firmicutes	Clostridia	Clostridiales	Peptostreptococcaceae	Romboutsia	Romboutsia timonensis
3655159024651	0.7899336965	10449007867	0.7559891872	0.4496556786	0.821870657	Bacteria	Bacteroidetes	Bacteroidia	Bacteroidales	Rikenellaceae	Alistipes	Alistipes putredinis
2884162230927	10924764126	14380511816	0.759692302	0.4474385312	0.821870657	Bacteria	Bacteroidetes	Bacteroidia	Bacteroidales	Prevotellaceae	Paraprevotella	Paraprevotella clara
113508982804	-0.5742331535	0.7754582222	-0.7405081758	0.4589917021	0.8279317048	Bacteria	Firmicutes	Clostridia	Clostridiales	Lachnospiraceae	Lachnoclostridium	glycyrrhizinilyticum
106014395911	-0.5953524134	0.8112683215	-0.7338538897	0.4630377923	0.8279317048	Bacteria	Actinobacteria	Actinobacteria	Actinomycetales	Actinomycetaceae	Actinomyces	Actinomyces oris
32597345164	14774582685	20067064021	0.7362603054	0.4615722983	0.8279317048	Bacteria	Firmicutes	Bacilli	Lactobacillales	Lactobacillaceae	Lactobacillus	Lactobacillus caviae
25522816502	-0.9981863793	13410579864	-0.7443275305	0.4566783497	0.8279317048	Bacteria	Firmicutes	Bacilli	Lactobacillales	Streptococcaceae	Streptococcus	Streptococcus lactarius
29113627231	-0.511135848	0.7039048217	-0.7261434107	0.467750859	0.8318380142	Bacteria	Firmicutes	Clostridia	Clostridiales	Eubacteriaceae	Intestinibacillus	Intestinibacillus massiliensis
251347454636	0.3990639461	0.5656089046	0.7055474956	0.4804695855	0.8452648579	Bacteria	Firmicutes	Clostridia	Clostridiales	Lachnospiraceae	Faecalimonas	Faecalimonas umbilicata
225281760917	14147136021	20527778077	0.6891703509	0.4907160725	0.8452648579	Bacteria	Proteobacteria	Deltaproteobacteria	Desulfovibrionales	Desulfovibrionaceae	Desulfovibrio	Desulfovibrio desulfuricans
45282143293	-0.6782179737	0.9669862796	-0.7013729026	0.4830703281	0.8452648579	Bacteria	Firmicutes	Clostridia	Clostridiales	Lachnospiraceae	Lachnobacterium	Lachnobacterium bovis
88801712132	0.4986155661	0.7211805269	0.6913880055	0.4893217398	0.8452648579	Bacteria	Firmicutes	Clostridia	Clostridiales	Ruminococcaceae	Anaerotruncus	Anaerotruncus rubiinfantis
48161081595	-0.658272392	0.9545824292	-0.6895919848	0.4904508093	0.8452648579	Bacteria	Actinobacteria	Actinobacteria	Bifidobacteriales	Bifidobacteriaceae	Bifidobacterium	Bifidobacterium breve
36820490756	-0.4977557666	0.717318534	-0.6939117603	0.4877375479	0.8452648579	Bacteria	Firmicutes	Clostridia	Clostridiales	Ruminococcaceae	Hydrogenoanaerobacterium	Hydrogenoanaerobacterium saccharovorans
315813118257	-11732916093	17751969158	-0.6609360341	0.508653336	0.8667200988	Bacteria	Firmicutes	Erysipelotrichia	Erysipelotrichales	Erysipelotrichaceae	Holdemanella	Holdemanella biformis
65664613326	-0.4148795411	0.6313175266	-0.6571646179	0.5110750735	0.8667200988	Bacteria	Firmicutes	Clostridia	Clostridiales	Clostridiaceae	Hungatella	Hungatella hathewayi
28969233017	0.527899142	0.7938345206	0.6649989744	0.506051149	0.8667200988	Bacteria	Firmicutes	Clostridia	Clostridiales	Ruminococcaceae	Papillibacter	Papillibacter cinnamivorans
49458209743	-13556798129	20920326966	-0.6480203752	0.5169717721	0.8677740459	Bacteria	Firmicutes	Bacilli	Lactobacillales	Lactobacillaceae	Lactobacillus	Lactobacillus ruminis
18483779076	-0.6225312529	0.9584613998	-0.649511032	0.5160081181	0.8677740459	Bacteria	Firmicutes	Clostridia	Clostridiales	Hungateiclostridiaceae	Ruminiclostridium	Ruminiclostridium cellobioparum
6702252194827	0.2564521926	0.4098751495	0.6256836818	0.5315224386	0.8698772042	Bacteria	Firmicutes	Clostridia	Clostridiales	Lachnospiraceae	Blautia	Blautia luti
320864481114	0.3107265446	0.5197565691	0.5978309136	0.5499527613	0.8698772042	Bacteria	Firmicutes	Clostridia	Clostridiales	Lachnospiraceae	Blautia	Blautia obeum
807990761452	0.4396688321	0.7326091481	0.6001410619	0.5484122289	0.8698772042	Bacteria	Firmicutes	Clostridia	Clostridiales	Lachnospiraceae	Coprococcus	Coprococcus catus
1446128063	-0.7924611383	12956217559	-0.6116454394	0.5407723675	0.8698772042	Bacteria	Firmicutes	Clostridia	Clostridiales	Vallitaleaceae	Vallitalea	Vallitalea pronyensis
524888387171	12909051646	21239961614	0.6077718915	0.5433387743	0.8698772042	Bacteria	Firmicutes	Negativicutes	Veillonellales	Veillonellaceae	Dialister	Dialister succinatiphilus
32906597965	12207380149	197801962	0.617151621	0.5371347226	0.8698772042	Bacteria	Firmicutes	Erysipelotrichia	Erysipelotrichales	Erysipelotrichaceae	Absiella	Absiella dolichum
304929260562	-0.6828815157	1125854293	-0.6065451985	0.5441527781	0.8698772042	Bacteria	Firmicutes	Clostridia	Clostridiales	Ruminococcaceae	Agathobaculum	Agathobaculum desmolans
397594693415	-0.4495064959	0.7331175444	-0.6131438257	0.5397812441	0.8698772042	Bacteria	Firmicutes	Clostridia	Clostridiales	Lachnospiraceae	Anaerotignum	Anaerotignum lactatifermentans
45871796511	-12033303198	20113665874	-0.598265044	0.549663097	0.8698772042	Bacteria	Bacteroidetes	Bacteroidia	Bacteroidales	Muribaculaceae	Muribaculum	Muribaculum intestinale
180551790962	0.8128305025	13100513681	0.6204569701	0.5349569751	0.8698772042	Bacteria	Lentisphaerae	Lentisphaeria	Victivallales	Victivallaceae	Victivallis	Victivallis vadensis
55553438206	-0.3854028372	0.6239268406	-0.6177051734	0.5367697012	0.8698772042	Bacteria	Firmicutes	Clostridia	Clostridiales	Clostridiaceae	Hungatella	Hungatella effluvii
28214042271	0.6089942516	0.9911515333	0.614431024	0.53893054	0.8698772042	Bacteria	Proteobacteria	Deltaproteobacteria	Desulfovibrionales	Desulfovibrionaceae	Desulfovibrio	Desulfovibrio alaskensis
299027841237	0.704688235	11980872803	0.5881777117	0.556413016	0.8758846042	Bacteria	Firmicutes	Bacilli	Lactobacillales	Enterococcaceae	Enterococcus	Enterococcus hirae
3763038934357	-0.5054044046	0.8762413507	-0.5767867543	0.5640835185	0.8837308457	Bacteria	Firmicutes	Clostridia	Clostridiales	Eubacteriaceae	Eubacterium	Eubacterium coprostanoligenes
487259906397	0.9607046429	16821214755	0.5711267925	0.5679136982	0.8855147237	Bacteria	Firmicutes	Erysipelotrichia	Erysipelotrichales	Erysipelotrichaceae	Catenibacterium	Catenibacterium mitsuokai
16885314310416	-0.356510751	0.6886480011	-0.5176966323	0.6046699483	0.8867656065	Bacteria	Firmicutes	Clostridia	Clostridiales	Lachnospiraceae	Unclassified	Unclassified
1295691180342	-0.3751204927	0.6936438431	-0.5407969759	0.5886475275	0.8867656065	Bacteria	Bacteroidetes	Bacteroidia	Bacteroidales	Bacteroidaceae	Bacteroides	Bacteroides uniformis
3516568004808	-0.875282791	16329191699	-0.5360233422	0.5919424183	0.8867656065	Bacteria	Bacteroidetes	Bacteroidia	Bacteroidales	Bacteroidaceae	Bacteroides	Bacteroides coprocola
5528100737024	-0.2669956558	0.5407057	-0.4937910877	0.6214537279	0.8867656065	Bacteria	Firmicutes	Clostridia	Clostridiales	Lachnospiraceae	Dorea	Dorea longicatena
3715920015488	0.3034730832	0.6168252169	0.4919920179	0.6227249863	0.8867656065	Bacteria	Firmicutes	Clostridia	Clostridiales	Ruminococcaceae	Ruminococcus	Ruminococcus faecis
1202560355078	0.6488300963	11575725492	0.5605092284	0.5751321469	0.8867656065	Bacteria	Proteobacteria	Betaproteobacteria	Burkholderiales	Sutterellaceae	Parasutterella	Parasutterella excrementihominis
503322345574	0.9682953615	17658573414	0.5483429147	0.5834564656	0.8867656065	Bacteria	Actinobacteria	Actinobacteria	Bifidobacteriales	Bifidobacteriaceae	Bifidobacterium	Bifidobacterium bifidum
577576200952	0.4467901626	0.9043912337	0.4940231019	0.6212898642	0.8867656065	Bacteria	Firmicutes	Clostridia	Clostridiales	Eubacteriaceae	Eubacterium	Eubacterium ventriosum
76511828093	-13753603949	25995235372	-0.5290817241	0.5967487589	0.8867656065	Bacteria	Firmicutes	Clostridia	Clostridiales	Lachnospiraceae	Tyzzerella	colinum
131424112556	0.4985524955	0.9379827742	0.5315156197	0.5950615203	0.8867656065	Bacteria	Firmicutes	Clostridia	Clostridiales	Christensenellaceae	Christensenella	Christensenella massiliensis
76922790502	0.9362345353	18375327299	0.5095063179	0.610397371	0.8867656065	Bacteria	Firmicutes	Clostridia	Clostridiales	Lachnospiraceae	Anaerostipes	Anaerostipes caccae
25741422697	0.5807730675	11132713321	0.5216815081	0.6018921019	0.8867656065	Bacteria	Firmicutes	Erysipelotrichia	Erysipelotrichales	Erysipelotrichaceae	Faecalicoccus	Faecalicoccus acidiformans
63515368117	-0.4971024919	0.9978097667	-0.4981936522	0.6183475562	0.8867656065	Bacteria	Bacteroidetes	Bacteroidia	Bacteroidales	Rikenellaceae	Alistipes	Alistipes senegalensis
50470907136	0.6004728354	12296522865	0.4883273442	0.6253179961	0.8867656065	Bacteria	Proteobacteria	Betaproteobacteria	Burkholderiales	Oxalobacteraceae	Oxalobacter	Oxalobacter formigenes
28722817213	-0.8716247888	16607568159	-0.5248358944	0.5996972766	0.8867656065	Bacteria	Firmicutes	Bacilli	Lactobacillales	Leuconostocaceae	Leuconostoc	Leuconostoc gelidum
48800475369	0.6766370783	12493966129	0.5415710842	0.5881140161	0.8867656065	Bacteria	Firmicutes	Clostridia	Clostridiales	Eubacteriaceae	Irregularibacter	Irregularibacter muris
323904862688	0.359497923	0.7350464676	0.4890819	0.6247837151	0.8867656065	Bacteria	Firmicutes	Bacilli	Lactobacillales	Streptococcaceae	Streptococcus	Streptococcus thermophilus
34402577893	-0.3113696674	0.6262597722	-0.4971893154	0.6190555554	0.8867656065	Bacteria	Firmicutes	Clostridia	Clostridiales	Lachnospiraceae	Lachnoanaerobaculum	Lachnoanaerobaculum orale
33503789584	-0.2798329769	0.5646152025	-0.4956171488	0.6201645514	0.8867656065	Bacteria	Firmicutes	Clostridia	Clostridiales	Lachnospiraceae	Blautia	Blautia marasmi
22640118183	0.7866803783	16062655882	0.4897573502	0.624305614	0.8867656065	Bacteria	Proteobacteria	Gammaproteobacteria	Enterobacterales	Enterobacteriaceae	Klebsiella	Klebsiella aerogenes
102842170727	0.2801770665	0.5679902612	0.4932779409	0.6218162127	0.8867656065	Bacteria	Firmicutes	Clostridia	Clostridiales	Clostridiaceae	Falcatimonas	Falcatimonas natans
216941430987	-0.5964137692	12324409367	-0.4839288857	0.6284363395	0.8873629	Bacteria	Bacteroidetes	Bacteroidia	Bacteroidales	Odoribacteraceae	Butyricimonas	Butyricimonas virosa
813376000987	-0.3913686196	0.8477855159	-0.46163636	0.6443421155	0.9002386445	Bacteria	Bacteroidetes	Bacteroidia	Bacteroidales	Rikenellaceae	Alistipes	Alistipes shahii
128000126231	0.3639559811	0.7791944354	0.4670926338	0.6404336041	0.9002386445	Bacteria	Firmicutes	Clostridia	Clostridiales	Ruminococcaceae	Sporobacter	Sporobacter termitidis
11665068067	-0.4619499379	10049927899	-0.4596549771	0.6457638909	0.9002386445	Bacteria	Bacteroidetes	Bacteroidia	Bacteroidales	Rikenellaceae	Alistipes	Alistipes ihumii
3581246959175	-0.576325882	12705828426	-0.4535917397	0.6501227	0.9024910054	Bacteria	Firmicutes	Clostridia	Clostridiales	Lachnospiraceae	Coprococcus	Coprococcus eutactus
1139632787	-0.2027359793	0.4585128188	-0.442159894	0.6583735057	0.9101045521	Bacteria	Firmicutes	Clostridia	Clostridiales	Lachnospiraceae	Lachnotalea	Lachnotalea glycerini
66613550652	0.7898908882	18685370054	0.4227322691	0.6724906092	0.9206253749	Bacteria	Firmicutes	Negativicutes	Acidaminococcales	Acidaminococcaceae	Acidaminococcus	Acidaminococcus fermentans
167760474999	0.2329578916	0.5544693973	0.4201456253	0.674379074	0.9206253749	Bacteria	Bacteroidetes	Bacteroidia	Bacteroidales	Bacteroidaceae	Bacteroides	Bacteroides dorei
285030491314	0.4116575068	0.9719943874	0.423518399	0.6719170775	0.9206253749	Bacteria	Firmicutes	Clostridia	Clostridiales	Eubacteriaceae	Eubacterium	Eubacterium xylanophilum
1363233676602	0.2305455161	0.5598354475	0.4118094293	0.6804791096	0.9251141613	Bacteria	Firmicutes	Clostridia	Clostridiales	Lachnospiraceae	Dorea	Dorea formicigenerans
3592069673909	0.3893758511	10430052302	0.3733210916	0.7089094805	0.9257418039	Bacteria	Proteobacteria	Gammaproteobacteria	Enterobacterales	Enterobacteriaceae	Escherichia	Escherichia fergusonii
2954480096167	0.7261547887	19474439737	0.3728758303	0.7092408614	0.9257418039	Bacteria	Firmicutes	Negativicutes	Acidaminococcales	Acidaminococcaceae	Phascolarctobacterium	Phascolarctobacterium succinatutens
994109181441	0.2842258006	0.7297561139	0.3894805335	0.6969207081	0.9257418039	Bacteria	Bacteroidetes	Bacteroidia	Bacteroidales	Bacteroidaceae	Bacteroides	Bacteroides ovatus
1177777007731	0.3117140033	0.8212370617	0.37956641	0.7042672989	0.9257418039	Bacteria	Bacteroidetes	Bacteroidia	Bacteroidales	Odoribacteraceae	Odoribacter	Odoribacter splanchnicus
170227460366	0.2076776024	0.5291828097	0.3924496385	0.6947260154	0.9257418039	Bacteria	Firmicutes	Clostridia	Clostridiales	Lachnospiraceae	Blautia	Blautia schinkii
160996672343	-0.4937093294	13368229513	-0.3693154198	0.7118926334	0.9257418039	Bacteria	Firmicutes	Clostridia	Clostridiales	Lachnospiraceae	Lachnoclostridium	hylemonae
76871360119	-0.7103483153	18926430161	-0.3753208129	0.7074218892	0.9257418039	Bacteria	Proteobacteria	Betaproteobacteria	Burkholderiales	Sutterellaceae	Duodenibacillus	Duodenibacillus massiliensis
162565145592	-0.1848811122	0.483713134	-0.3822123057	0.7023038949	0.9257418039	Bacteria	Firmicutes	Clostridia	Clostridiales	Lachnospiraceae	Eisenbergiella	Eisenbergiella tayi
86958660852	-0.346765813	0.858567021	-0.4038890436	0.6862943135	0.9257418039	Bacteria	Firmicutes	Erysipelotrichia	Erysipelotrichales	Erysipelotrichaceae	Holdemania	Holdemania filiformis
84638865089	-0.3700462513	0.9803512764	-0.3774629158	0.7058296185	0.9257418039	Bacteria	Bacteroidetes	Bacteroidia	Bacteroidales	Bacteroidaceae	Bacteroides	Bacteroides rodentium
30068054117	0.2698445687	0.6833849845	0.394864644	0.6929427841	0.9257418039	Bacteria	Firmicutes	Clostridia	Clostridiales	Ruminococcaceae	Phocea	Phocea massiliensis
28836933427522	0.4709753675	13142926898	0.3583489212	0.7200822118	0.9298069159	Bacteria	Bacteroidetes	Bacteroidia	Bacteroidales	Prevotellaceae	Prevotella	Prevotella copri
5814267265	-0.3948519378	1104288993	-0.3575621421	0.7206710138	0.9298069159	Bacteria	Firmicutes	Bacilli	Lactobacillales	Streptococcaceae	Streptococcus	Streptococcus rubneri
5988975009639	-0.4038152665	11648892181	-0.3466555104	0.7288501374	0.9366863094	Bacteria	Actinobacteria	Actinobacteria	Bifidobacteriales	Bifidobacteriaceae	Bifidobacterium	Bifidobacterium adolescentis
164304238763	-0.4277251026	12666485946	-0.3376825304	0.735602441	0.937647411	Bacteria	Actinobacteria	Coriobacteriia	Eggerthellales	Eggerthellaceae	Raoultibacter	Raoultibacter timonensis
196573155061	0.3466749456	10369959902	0.3343069297	0.7381479619	0.937647411	Bacteria	Bacteroidetes	Bacteroidia	Bacteroidales	Odoribacteraceae	Butyricimonas	Butyricimonas paravirosa
204757847281	-0.2108685623	0.6261066903	-0.3367933382	0.7362726953	0.937647411	Bacteria	Actinobacteria	Actinobacteria	Actinomycetales	Actinomycetaceae	Schaalia	Schaalia odontolytica
12207244167455	0.2885824583	0.8746161912	0.329953254	0.7414352837	0.9382008013	Bacteria	Firmicutes	Clostridia	Clostridiales	Ruminococcaceae	Ruminococcus	Ruminococcus bromii
30883206914	0.436340227	1343983346	0.32466193	0.7454369505	0.9396504089	Bacteria	Firmicutes	Erysipelotrichia	Erysipelotrichales	Erysipelotrichaceae	Holdemania	Holdemania massiliensis
700847533	-0.3121061893	0.9894376929	-0.3154379418	0.7524291628	0.9412516903	Bacteria	Actinobacteria	Coriobacteriia	Eggerthellales	Eggerthellaceae	Gordonibacter	Gordonibacter pamelaeae
35701021757	-0.2183748645	0.6900402051	-0.3164668709	0.7516481671	0.9412516903	Bacteria	Bacteroidetes	Bacteroidia	Bacteroidales	Bacteroidaceae	Bacteroides	Bacteroides faecichinchillae
201461239112	-0.3571949994	11949322265	-0.2989249026	0.7649973458	0.942637179	Bacteria	Firmicutes	Clostridia	Clostridiales	Peptostreptococcaceae	Intestinibacter	Intestinibacter bartlettii
191784089736	-0.1384905018	0.4621875161	-0.2996413728	0.7644507224	0.942637179	Bacteria	Firmicutes	Clostridia	Clostridiales	Lachnospiraceae	Roseburia	Roseburia hominis
62141216487	0.2423563437	0.7875935095	0.3077175482	0.7582972657	0.942637179	Bacteria	Firmicutes	Clostridia	Clostridiales	Lachnospiraceae	Blautia	Blautia hydrogenotrophica
61204588712	0.1866502325	0.6219002846	0.3001288746	0.7640788552	0.942637179	Bacteria	Firmicutes	Clostridia	Clostridiales	Lachnospiraceae	Mobilitalea	Mobilitalea sibirica
49391443605	0.4056882143	1428770761	0.2839421308	0.7764547289	0.9531850963	Bacteria	Actinobacteria	Actinobacteria	Bifidobacteriales	Bifidobacteriaceae	Bifidobacterium	Bifidobacterium apri
5049619564889	-0.1516951044	0.6832634259	-0.2220155487	0.8243017793	0.9631422314	Bacteria	Firmicutes	Clostridia	Clostridiales	Lachnospiraceae	Roseburia	Roseburia faecis
1862613438757	0.2262277528	0.9097719359	0.2486642464	0.8036205075	0.9631422314	Bacteria	Firmicutes	Clostridia	Clostridiales	Oscillospiraceae	Oscillibacter	Oscillibacter valericigenes
755502023103	-0.1625566444	0.7375134667	-0.2204117643	0.8255504841	0.9631422314	Bacteria	Firmicutes	Clostridia	Clostridiales	Lachnospiraceae	Blautia	Blautia stercoris
1262450883683	-0.1135074535	0.4614925825	-0.2459572651	0.8057153139	0.9631422314	Bacteria	Firmicutes	Clostridia	Clostridiales	Lachnospiraceae	Murimonas	Murimonas intestini
171953781582	0.3518429643	15879978561	0.2215638786	0.8246534042	0.9631422314	Bacteria	Proteobacteria	Betaproteobacteria	Burkholderiales	Sutterellaceae	Sutterella	Sutterella massiliensis
262883676508	-0.2588879654	11660362027	-0.2220239516	0.824295238	0.9631422314	Bacteria	Bacteroidetes	Bacteroidia	Bacteroidales	Barnesiellaceae	Coprobacter	Coprobacter fastidiosus
395800178	-0.3725561215	1598312578	-0.2330934053	0.8156888757	0.9631422314	Bacteria	Proteobacteria	Gammaproteobacteria	Enterobacterales	Enterobacteriaceae	Enterobacter	Enterobacter tabaci
38527396936	-0.2797487059	11867477977	-0.2357271751	0.8136443814	0.9631422314	Bacteria	Firmicutes	Negativicutes	Veillonellales	Veillonellaceae	Veillonella	Veillonella rogosae
98276407211	0.1585736545	0.6285699835	0.2522768484	0.8008270818	0.9631422314	Bacteria	Firmicutes	Clostridia	Clostridiales	Lachnospiraceae	Anaerobium	Anaerobium acetethylicum
132236011711	-0.2627932396	10292129419	-0.2553341771	0.798465005	0.9631422314	Bacteria	Firmicutes	Erysipelotrichia	Erysipelotrichales	Erysipelotrichaceae	Longibaculum	Longibaculum muris
33729978959	0.3511045885	13803658006	0.2543561919	0.7992203919	0.9631422314	Bacteria	Firmicutes	Clostridia	Clostridiales	Eubacteriaceae	Rhabdanaerobium	Rhabdanaerobium thermarum
25559365619	0.2428114334	0.9378960561	0.2588894919	0.7957205061	0.9631422314	Bacteria	Firmicutes	Clostridia	Clostridiales	Lachnospiraceae	Faecalicatena	Faecalicatena contorta
40738403484	-0.1801670008	0.6815560009	-0.2643465842	0.7915128675	0.9631422314	Bacteria	Firmicutes	Clostridia	Clostridiales	Ruminococcaceae	Harryflintia	Harryflintia acetispora
133567726486	0.1739738667	0.7691265676	0.2261966678	0.8210484622	0.9631422314	Bacteria	Firmicutes	Clostridia	Clostridiales	Hungateiclostridiaceae	Ruminiclostridium	Ruminiclostridium cellulolyticum
1183113007332	0.124104907	0.5988281506	0.2072462807	0.835817525	0.9716747906	Bacteria	Firmicutes	Clostridia	Clostridiales	Ruminococcaceae	Agathobaculum	Agathobaculum butyriciproducens
593159806616	0.2065444728	10213180643	0.2022332514	0.8397343793	0.9727908831	Bacteria	Bacteroidetes	Bacteroidia	Bacteroidales	Bacteroidaceae	Bacteroides	Bacteroides fragilis
6478486399263	0.0579047699	0.7012241356	0.0825766926	0.9341881346	0.9736759398	Bacteria	Firmicutes	Bacilli	Lactobacillales	Streptococcaceae	Streptococcus	Streptococcus salivarius
14260090349869	0.147107865	13674203143	0.107580576	0.9143284057	0.9736759398	Bacteria	Verrucomicrobia	Verrucomicrobiae	Verrucomicrobiales	Akkermansiaceae	Akkermansia	Akkermansia muciniphila
3880004751239	0.1308379588	12085790254	0.1082576778	0.9137912934	0.9736759398	Bacteria	Bacteroidetes	Bacteroidia	Bacteroidales	Bacteroidaceae	Bacteroides	Bacteroides massiliensis
4545230391423	0.1273462143	0.6966468626	0.1827988054	0.854955886	0.9736759398	Bacteria	Firmicutes	Clostridia	Clostridiales	Lachnospiraceae	Anaerostipes	Anaerostipes hadrus
584629291466	-0.126955658	12225325485	-0.1038464442	0.9172912086	0.9736759398	Bacteria	Actinobacteria	Actinobacteria	Bifidobacteriales	Bifidobacteriaceae	Bifidobacterium	Bifidobacterium pseudocatenulatum
3431743620814	-0.071573749	0.62187074	-0.1150942542	0.9083704141	0.9736759398	Bacteria	Firmicutes	Clostridia	Clostridiales	Lachnospiraceae	Fusicatenibacter	Fusicatenibacter saccharivorans
2837297375548	-0.068406833	0.816570193	-0.0837733652	0.933236625	0.9736759398	Bacteria	Bacteroidetes	Bacteroidia	Bacteroidales	Bacteroidaceae	Bacteroides	Bacteroides caccae
2625738924035	-0.1461856364	0.8887995865	-0.164475365	0.8693569385	0.9736759398	Bacteria	Firmicutes	Bacilli	Lactobacillales	Streptococcaceae	Streptococcus	Streptococcus sinensis
2116776561782	0.092647715	0.845864224	0.1095302442	0.9127819347	0.9736759398	Bacteria	Firmicutes	Clostridia	Clostridiales	Lachnospiraceae	Lachnoclostridium	Lachnoclostridium pacaense
1247339567001	-0.1040589853	0.7498166691	-0.1387792371	0.8896246016	0.9736759398	Bacteria	Firmicutes	Clostridia	Clostridiales	Lachnospiraceae	Roseburia	Roseburia inulinivorans
3748646568381	0.0332702038	0.4092215763	0.0813011966	0.9352024224	0.9736759398	Bacteria	Firmicutes	Clostridia	Clostridiales	Lachnospiraceae	Kineothrix	Kineothrix alysoides
1040418253292	0.0945186447	10291152189	0.09184457	0.926821532	0.9736759398	Bacteria	Firmicutes	Clostridia	Clostridiales	Lachnospiraceae	Lachnospira	Lachnospira pectinoschiza
41975554268	0.1924989343	15250745039	0.1262226428	0.8995556883	0.9736759398	Bacteria	Actinobacteria	Coriobacteriia	Eggerthellales	Eggerthellaceae	Slackia	Slackia isoflavoniconvertens
163502606224	0.1724612641	14710531042	0.1172365998	0.9066725644	0.9736759398	Bacteria	Proteobacteria	Betaproteobacteria	Burkholderiales	Sutterellaceae	Sutterella	Sutterella wadsworthensis
325454078495	-0.1391852252	0.9581021591	-0.1452717999	0.8844962789	0.9736759398	Bacteria	Firmicutes	Clostridia	Clostridiales	Ruminococcaceae	Negativibacillus	Negativibacillus massiliensis
107376161753	0.2352706955	14757462419	0.159424899	0.8733341232	0.9736759398	Bacteria	Firmicutes	Clostridia	Clostridiales	Lachnospiraceae	Tyzzerella	Tyzzerella nexilis
385333264653	-0.2476985207	14914993994	-0.1660734968	0.868099111	0.9736759398	Bacteria	Firmicutes	Clostridia	Clostridiales	Ruminococcaceae	Ruminococcus	Ruminococcus flavefaciens
87268576925	-0.2122487037	14834526134	-0.1430775084	0.8862289679	0.9736759398	Bacteria	Firmicutes	Clostridia	Clostridiales	Ruminococcaceae	Drancourtella	Drancourtella massiliensis
63568370995	0.3154201684	22637633854	0.1393344245	0.8891858884	0.9736759398	Bacteria	Actinobacteria	Coriobacteriia	Coriobacteriales	Atopobiaceae	Olsenella	Olsenella scatoligenes
25224068003	-0.1015619814	0.5738134478	-0.1769947739	0.8595124946	0.9736759398	Bacteria	Firmicutes	Clostridia	Clostridiales	Clostridiaceae	Butyricicoccus	Butyricicoccus faecihominis
111270982682	0.1699281961	13076828583	0.1299460301	0.8966091262	0.9736759398	Bacteria	Firmicutes	Clostridia	Clostridiales	Peptococcaceae	Peptococcus	Peptococcus niger
158394103833	-0.0759014449	0.6575780258	-0.1154257623	0.90810766	0.9736759398	Bacteria	Firmicutes	Clostridia	Clostridiales	Lachnospiraceae	Anaerotignum	Anaerotignum aminivorans
55482107124	0.0857988494	0.9308748835	0.0921701197	0.926562878	0.9736759398	Bacteria	Firmicutes	Clostridia	Clostridiales	Ruminococcaceae	Ethanoligenens	Ethanoligenens harbinense
247171775924	0.1371202888	0.7069778333	0.1939527413	0.8462128862	0.9736759398	Bacteria	Actinobacteria	Actinobacteria	Bifidobacteriales	Bifidobacteriaceae	Bifidobacterium	Bifidobacterium callitrichidarum
105630846574	-0.1673541619	0.8971388949	-0.1865420871	0.8520196773	0.9736759398	Bacteria	Firmicutes	Erysipelotrichia	Erysipelotrichales	Erysipelotrichaceae	Erysipelatoclostridium	saccharogumia
11454014841	0.0969406863	11182388787	0.0866904989	0.9309175288	0.9736759398	Bacteria	Actinobacteria	Actinobacteria	Actinomycetales	Actinomycetaceae	Schaalia	Schaalia meyeri
50821849551	0.1052907744	0.748868518	0.1405998141	0.8881860951	0.9736759398	Bacteria	Firmicutes	Clostridia	Clostridiales	Lachnospiraceae	Abyssivirga	Abyssivirga alkaniphila
138765882076	0.124074172	0.7472949259	0.1660310645	0.8681325035	0.9736759398	Bacteria	Bacteroidetes	Bacteroidia	Bacteroidales	Bacteroidaceae	Bacteroides	Bacteroides caecimuris
111799185882	0.0541116354	0.63588844	0.0850961144	0.9321849793	0.9736759398	Bacteria	Firmicutes	Clostridia	Clostridiales	Lachnospiraceae	Lachnoclostridium	lavalense
37447149048	-0.0959682183	0.9577405734	-0.1002027281	0.9201833802	0.9736759398	Bacteria	Firmicutes	Clostridia	Clostridiales	Peptococcaceae	Desulfohalotomaculum	Desulfohalotomaculum halophilum
39733276783	0.0830796474	0.7848246805	0.1058575877	0.9156953451	0.9736759398	Bacteria	Firmicutes	Clostridia	Clostridiales	Ruminococcaceae	Anaerofilum	Anaerofilum pentosovorans
31074842403	-0.1188987581	0.6983080791	-0.1702669089	0.8648002341	0.9736759398	Bacteria	Firmicutes	Clostridia	Clostridiales	Lachnospiraceae	Blautia	Blautia producta
943359840123	-0.0603365495	0.8854067025	-0.0681455758	0.9456697504	0.97743673	Bacteria	Firmicutes	Clostridia	Clostridiales	Eubacteriaceae	Eubacterium	Eubacterium ramulus
1445196785668	-0.0834442773	14171289652	-0.0588826277	0.9530455951	0.97743673	Bacteria	Firmicutes	Clostridia	Clostridiales	Hungateiclostridiaceae	Anaerobacterium	Anaerobacterium chartisolvens
381888366474	0.1053415773	17166313497	0.0613652881	0.9510682964	0.97743673	Bacteria	Actinobacteria	Coriobacteriia	Coriobacteriales	Coriobacteriaceae	Collinsella	Collinsella bouchesdurhonensis
154696450234	0.1185533765	18254463328	0.0649448709	0.9482178941	0.97743673	Bacteria	Actinobacteria	Coriobacteriia	Eggerthellales	Eggerthellaceae	Gordonibacter	Gordonibacter urolithinfaciens
35813128292	0.0407458108	0.7013093369	0.0580996269	0.9536692716	0.97743673	Bacteria	Firmicutes	Clostridia	Clostridiales	Lachnospiraceae	Pseudobutyrivibrio	Pseudobutyrivibrio ruminis
53920624706	-0.0413099849	0.8234501932	-0.0501669502	0.9599893483	0.9808586819	Bacteria	Actinobacteria	Actinobacteria	Micrococcales	Micrococcaceae	Rothia	Rothia mucilaginosa
446644463616	-0.1253479084	27975771285	-0.0448058812	0.9642620373	0.9821740256	Bacteria	Bacteroidetes	Bacteroidia	Bacteroidales	Prevotellaceae	Massiliprevotella	Massiliprevotella massiliensis
1501164853936	-0.0279290237	0.8986129537	-0.0310801481	0.9752056215	0.9872081523	Bacteria	Firmicutes	Bacilli	Lactobacillales	Lactobacillaceae	Lactobacillus	Lactobacillus rogosae
5370691599218	-0.0144921296	0.4208646537	-0.0344341808	0.9725309273	0.9872081523	Bacteria	Firmicutes	Clostridia	Clostridiales	Unclassified	Unclassified	Unclassified
774841562254	-0.0461024193	17263691505	-0.0267048443	0.9786951493	0.9877015464	Bacteria	Actinobacteria	Coriobacteriia	Coriobacteriales	Coriobacteriaceae	Senegalimassilia	Senegalimassilia anaerobia
2262896712479	0.0138569769	0.7379333461	0.0187780874	0.9850181344	0.9910427102	Bacteria	Firmicutes	Clostridia	Clostridiales	Ruminococcaceae	Ruminococcus	Ruminococcus lactaris
149932260834	0.0080852405	12753250231	0.0063397489	0.9949416461	0.9959376148	Bacteria	Firmicutes	Clostridia	Clostridiales	Hungateiclostridiaceae	Ruminiclostridium	Ruminiclostridium papyrosolvens
55645578751	-0.0047438985	0.9317351257	-0.0050914669	0.9959376148	0.9959376148	Bacteria	Actinobacteria	Actinobacteria	Bifidobacteriales	Bifidobacteriaceae	Bifidobacterium	Bifidobacterium saguini
12519550628	-0.3664587933	11623571944	-0.3152720997	0.7525550668		Bacteria	Firmicutes	Bacilli	Lactobacillales	Streptococcaceae	Streptococcus	Streptococcus pasteurianus
0.7388650843	0.3793046899	13194833673	0.2874645481	0.7737566434		Bacteria	Proteobacteria	Gammaproteobacteria	Aeromonadales	Succinivibrionaceae	Succinivibrio	Succinivibrio dextrinosolvens
0.0271494241	0.0262672542	31718854473	0.0082812745	0.9933925744		Bacteria	Tenericutes	Mollicutes	Anaeroplasmatales	Anaeroplasmataceae	Asteroleplasma	Asteroleplasma anaerobium
0.2964752079	0.5325295891	30411817474	0.1751061375	0.8609962358		Bacteria	Firmicutes	Clostridia	Clostridiales	Peptostreptococcaceae	Unclassified	Unclassified
0.074938641	-0.3291544789	31707022761	-0.1038112223	0.9173191605		Bacteria	Bacteroidetes	Bacteroidia	Bacteroidales	Odoribacteraceae	Odoribacter	Odoribacter laneus
0.4567960686	-0.2612691517	31711122724	-0.0823903821	0.9343362841		Bacteria	Fusobacteria	Fusobacteriia	Fusobacteriales	Fusobacteriaceae	Fusobacterium	Fusobacterium mortiferum
0.3145802584	0.1229336525	17756562178	0.0692328004	0.9448043148		Bacteria	Bacteroidetes	Bacteroidia	Bacteroidales	Prevotellaceae	Alloprevotella	Alloprevotella rava
0.384207337	14630253282	23712660912	0.6169806643	0.5372474794		Bacteria	Firmicutes	Bacilli	Lactobacillales	Lactobacillaceae	Lactobacillus	Lactobacillus pontis
0.564152233	10416293017	16465224924	0.6326237914	0.5269793469		Bacteria	Firmicutes	Bacilli	Lactobacillales	Lactobacillaceae	Lactobacillus	Lactobacillus ultunensis
0.38335549	-18169247287	31575089379	-0.5754297975	0.5650006566		Bacteria	Bacteroidetes	Bacteroidia	Bacteroidales	Bacteroidaceae	Mediterranea	Mediterranea massiliensis
15549776758	3293715102	300655534	10955112178	0.2732927337		Bacteria	Firmicutes	Negativicutes	Veillonellales	Veillonellaceae	Megasphaera	Megasphaera elsdenii
16311560558	-0.864304231	13608220639	-0.6351339047	0.5253410861		Bacteria	Actinobacteria	Actinobacteria	Bifidobacteriales	Bifidobacteriaceae	Bifidobacterium	Bifidobacterium animalis;Bifidobacterium animalis subsp. lactis
0.8889853007	10250921802	14439872071	0.709903921	0.4777637188		Bacteria	Firmicutes	Bacilli	Lactobacillales	Leuconostocaceae	Weissella	Weissella confusa
21816524179	35728112033	16384085992	21806594552	0.029208614		Bacteria	Firmicutes	Clostridia	Clostridiales	Clostridiaceae	Clostridium	Clostridium perfringens
1916301144	39199159248	31485052342	12450085463	0.2131286088		Bacteria	Candidatus Melainabacteria	Unclassified	Unclassified	Unclassified	Unclassified	Unclassified
0.2195349484	-0.0991831438	317188545	-0.0312694596	0.9750546462		Bacteria	Bacteroidetes	Bacteroidia	Bacteroidales	Prevotellaceae	Paraprevotella	Paraprevotella xylaniphila
19798166333	0.6249598547	15668463971	0.3988647872	0.6899928364		Bacteria	Firmicutes	Bacilli	Lactobacillales	Lactobacillaceae	Lactobacillus	Lactobacillus fermentum
20296000156	-15067885464	20347805761	-0.7405164783	0.4589866662		Bacteria	Proteobacteria	Gammaproteobacteria	Enterobacterales	Enterobacteriaceae	Citrobacter	Citrobacter freundii
12193020044	0.0772489515	0.9885217089	0.0781459333	0.9377119694		Bacteria	Firmicutes	Clostridia	Clostridiales	Lachnospiraceae	Butyrivibrio	Butyrivibrio crossotus
20105457019	30858904729	26548695999	11623510522	0.2450928971		Bacteria	Firmicutes	Bacilli	Lactobacillales	Streptococcaceae	Streptococcus	Streptococcus sobrinus
0.6632626668	-30058420295	31340633394	-0.9590878371	0.3375144972		Bacteria	Firmicutes	Bacilli	Lactobacillales	Leuconostocaceae	Leuconostoc	Leuconostoc lactis
10514053463	0.3781914712	26200813025	0.1443434106	0.8852293005		Bacteria	Proteobacteria	Gammaproteobacteria	Enterobacterales	Hafniaceae	Obesumbacterium	Obesumbacterium proteus
0.2203290663	-0.8013397194	25830069982	-0.3102352103	0.7563820965		Bacteria	Firmicutes	Bacilli	Lactobacillales	Lactobacillaceae	Pediococcus	Pediococcus stilesii
0	0	0	0	1		Bacteria	Actinobacteria	Coriobacteriia	Coriobacteriales	Atopobiaceae	Libanicoccus	Libanicoccus massiliensis
0.8322918378	17962251322	19410769376	0.9253755466	0.3547705941		Bacteria	Proteobacteria	Gammaproteobacteria	Enterobacterales	Enterobacteriaceae	Klebsiella	Klebsiella quasipneumoniae;Klebsiella quasipneumoniae subsp. quasipneumoniae
16778280823	37303639279	29514522857	12639079229	0.2062630777		Archaea	Euryarchaeota	Methanobacteria	Methanobacteriales	Methanobacteriaceae	Methanosphaera	Methanosphaera stadtmanae
20310195764	0.3192066185	20540752027	0.1554016221	0.8765047054		Bacteria	Firmicutes	Erysipelotrichia	Erysipelotrichales	Erysipelotrichaceae	Longicatena	Longicatena caecimuris
17143085097	34490815502	20678876748	16679250001	0.0953306161		Bacteria	Firmicutes	Bacilli	Lactobacillales	Lactobacillaceae	Lactobacillus	Lactobacillus crispatus
21592256222	-29578939347	20884176343	-14163325793	0.1566781534		Bacteria	Firmicutes	Bacilli	Lactobacillales	Enterococcaceae	Enterococcus	Enterococcus faecalis
0.445310206	18927868738	2740241962	0.690737132	0.48973075		Bacteria	Verrucomicrobia	Verrucomicrobiae	Verrucomicrobiales	Verrucomicrobiaceae	Fucophilus	Fucophilus fucoidanolyticus
14612996466	15851704041	14039690569	11290636331	0.2588709912		Bacteria	Bacteroidetes	Bacteroidia	Bacteroidales	Bacteroidaceae	Bacteroides	Bacteroides nordii
0.8108851298	-0.4562575554	15886804257	-0.2871927846	0.7739647107		Bacteria	Firmicutes	Clostridia	Clostridiales	Clostridiaceae	Fonticella	Fonticella tunisiensis
0	0	0	0	1		Bacteria	Proteobacteria	Betaproteobacteria	Burkholderiales	Sutterellaceae	Parasutterella	Parasutterella secunda
0.7078024524	15610722169	15079571624	10352231853	0.3005646934		Bacteria	Firmicutes	Negativicutes	Veillonellales	Veillonellaceae	Veillonella	Veillonella tobetsuensis
11322547824	21031232579	29682907044	0.7085300826	0.4786161377		Bacteria	Bacteroidetes	Flavobacteriia	Flavobacteriales	Flavobacteriaceae	Coenonia	Coenonia anatina
13413370674	-0.8297107871	2060171426	-0.4027387122	0.6871404519		Bacteria	Proteobacteria	Gammaproteobacteria	Enterobacterales	Enterobacteriaceae	Klebsiella	Klebsiella oxytoca
0.5181881985	21244981457	15697059041	13534370612	0.1759160443		Bacteria	Firmicutes	Bacilli	Lactobacillales	Lactobacillaceae	Lactobacillus	Lactobacillus plantarum
0.7853984039	0.0929844653	25000131855	0.0371935899	0.9703306496		Bacteria	Firmicutes	Clostridia	Clostridiales	Clostridiales Family XIII. Incertae Sedis	Anaerovorax	Anaerovorax odorimutans
17627220993	-0.2043244561	0.9986910034	-0.2045922667	0.8378906979		Bacteria	Firmicutes	Erysipelotrichia	Erysipelotrichales	Erysipelotrichaceae	Dielma	Dielma fastidiosa
0.3700719051	-0.4076828064	31605598337	-0.128990694	0.8973650124		Bacteria	Synergistetes	Synergistia	Synergistales	Synergistaceae	Pyramidobacter	Pyramidobacter piscolens
0.5451684601	0.1708817657	14995264548	0.113957153	0.909271759		Bacteria	Firmicutes	Clostridia	Clostridiales	Peptostreptococcaceae	Paeniclostridium	Paeniclostridium sordellii
0.0705321989	-0.8298350077	31693384741	-0.261832245	0.7934507782		Bacteria	Proteobacteria	Betaproteobacteria	Burkholderiales	Sutterellaceae	Turicimonas	Turicimonas muris
12914930233	-46136923837	25450959599	-18127773791	0.0698661643		Bacteria	Proteobacteria	Gammaproteobacteria	Enterobacterales	Pectobacteriaceae	Pectobacterium	Pectobacterium carotovorum
10106856613	-0.262755693	0.9316808938	-0.2820232708	0.7779256667		Bacteria	Firmicutes	Clostridia	Clostridiales	Lachnospiraceae	Lachnoclostridium	celerecrescens
108681907	0.5512338976	29894273612	0.1843944779	0.8537040015		Bacteria	Bacteroidetes	Bacteroidia	Bacteroidales	Porphyromonadaceae	Gabonibacter	Gabonibacter massiliensis
13682354713	25362812989	29449422825	0.8612329396	0.3891097616		Bacteria	Tenericutes	Mollicutes	Entomoplasmatales	Spiroplasmataceae	Spiroplasma	Spiroplasma alleghenense
0.2998323143	0.5271624609	15196708529	0.346892526	0.7286720618		Bacteria	Firmicutes	Bacilli	Bacillales	Staphylococcaceae	Staphylococcus	Staphylococcus xylosus
10102891012	21034667416	17279426201	12173244164	0.223480808		Bacteria	Bacteroidetes	Bacteroidia	Bacteroidales	Tannerellaceae	Parabacteroides	Parabacteroides gordonii
16368088138	0.9361659713	15578081025	0.6009507652	0.5478727796		Bacteria	Bacteroidetes	Bacteroidia	Bacteroidales	Prevotellaceae	Prevotella	Prevotella histicola
0.5724443467	-0.4793622741	22018209589	-0.2177117409	0.8276537152		Bacteria	Firmicutes	Clostridia	Clostridiales	Clostridiaceae	Clostridium	Clostridium paraputrificum
13313561938	-140614412	14458629775	-0.9725293074	0.3307872921		Bacteria	Firmicutes	Bacilli	Lactobacillales	Leuconostocaceae	Leuconostoc	Leuconostoc mesenteroides;Leuconostoc mesenteroides subsp. jonggajibkimchii
0.250223502	0.1261467688	25747921343	0.0489929914	0.9609248813		Bacteria	Firmicutes	Bacilli	Lactobacillales	Streptococcaceae	Lactococcus	Lactococcus piscium
17291770544	20222032883	17447593131	1159015615	0.2464498202		Bacteria	Firmicutes	Clostridia	Clostridiales	Clostridiaceae	Caloramator	Caloramator mitchellensis
0.3390673287	-0.327281747	3157848649	-0.1036407325	0.9174544619		Bacteria	Proteobacteria	Gammaproteobacteria	Enterobacterales	Enterobacteriaceae	Enterobacter	Enterobacter kobei
0.4955103021	-0.0913685036	14359542796	-0.0636291175	0.9492655463		Bacteria	Firmicutes	Clostridia	Clostridiales	Clostridiaceae	Clostridium	Clostridium quinii
20312980672	-22321333771	13501867263	-16532034671	0.0982894611		Bacteria	Proteobacteria	Gammaproteobacteria	Enterobacterales	Erwiniaceae	Erwinia	Erwinia iniecta
11682433377	20679713897	22571824153	0.9161737995	0.3595757452		Bacteria	Bacteroidetes	Bacteroidia	Bacteroidales	Porphyromonadaceae	Porphyromonas	Porphyromonas loveana
0.768387048	-23649169204	20372800151	-11608207527	0.2457148016		Bacteria	Proteobacteria	Gammaproteobacteria	Enterobacterales	Hafniaceae	Hafnia	Hafnia paralvei
15551355982	-0.023510469	17973890739	-0.0130803449	0.9895636924		Bacteria	Proteobacteria	Gammaproteobacteria	Enterobacterales	Enterobacteriaceae	Siccibacter	Siccibacter turicensis
17279568729	-0.3508518538	0.7464221983	-0.4700447743	0.6383230288		Bacteria	Firmicutes	Clostridia	Clostridiales	Eubacteriaceae	Eubacterium	Eubacterium oxidoreducens
0.3610536914	-0.4532181754	31062725476	-0.1459041885	0.883997025		Bacteria	Firmicutes	Negativicutes	Veillonellales	Veillonellaceae	Megasphaera	Megasphaera micronuciformis
0.8369423009	0.4905208342	19363862834	0.2533176559	0.8000227535		Bacteria	Bacteroidetes	Bacteroidia	Bacteroidales	Prevotellaceae	Prevotella	Prevotella corporis
20656397776	-13707053795	1871197959	-0.732528257	0.4638462022		Bacteria	Actinobacteria	Actinobacteria	Bifidobacteriales	Bifidobacteriaceae	Scardovia	Scardovia wiggsiae
18899844689	0.1281900626	0.9294951785	0.1379136391	0.890308671		Bacteria	Firmicutes	Clostridia	Clostridiales	Lachnospiraceae	Anaerosporobacter	Anaerosporobacter mobilis
13617385987	15198922239	13423507039	11322616508	0.2575244477		Bacteria	Firmicutes	Clostridia	Clostridiales	Peptococcaceae	Desulfitobacterium	Desulfitobacterium hafniense
0.215722441	-14449915662	3161238889	-0.4570966058	0.6476016098		Bacteria	Proteobacteria	Deltaproteobacteria	Desulfovibrionales	Desulfovibrionaceae	Mailhella	Mailhella massiliensis
0.9601042517	20983648943	17918036487	11710908702	0.2415622532		Bacteria	Firmicutes	Bacilli	Lactobacillales	Leuconostocaceae	Leuconostoc	Leuconostoc carnosum
15976083508	-0.7858074802	10074334934	-0.7800092864	0.4353854091		Bacteria	Firmicutes	Tissierellia	Tissierellales	Peptoniphilaceae	Peptoniphilus	Peptoniphilus duerdenii
0.1902540902	0.7335473952	31703990122	0.2313738405	0.8170243861		Bacteria	Firmicutes	Erysipelotrichia	Erysipelotrichales	Erysipelotrichaceae	Erysipelothrix	Erysipelothrix larvae
0.363274725	0.3344235018	15314494206	0.2183705823	0.8271403843		Bacteria	Fusobacteria	Fusobacteriia	Fusobacteriales	Fusobacteriaceae	Fusobacterium	Fusobacterium nucleatum;Fusobacterium nucleatum subsp. animalis
11178374209	14945644886	174971107	0.8541778779	0.3930064386		Bacteria	Firmicutes	Clostridia	Clostridiales	Hungateiclostridiaceae	Saccharofermentans	Saccharofermentans acetigenes
11030800272	-41745908134	31257006916	-13355695971	0.181689993		Bacteria	Actinobacteria	Actinobacteria	Bifidobacteriales	Bifidobacteriaceae	Bifidobacterium	Bifidobacterium scardovii
0.904668406	18340814681	18968246694	0.9669219816	0.333583037		Bacteria	Firmicutes	Tissierellia	Tissierellales	Peptoniphilaceae	Finegoldia	Finegoldia magna
0.8051783369	-18731567131	21017381478	-0.8912417159	0.3727995092		Bacteria	Cyanobacteria	Unclassified	Unclassified	Unclassified	Unclassified	Unclassified
14788287042	0.0032008175	10009332559	0.0031978331	0.9974485027		Bacteria	Firmicutes	Clostridia	Clostridiales	Lachnospiraceae	Lachnoclostridium	fimetarium
148003235	-0.7604398679	10655291756	-0.713673436	0.4754291361		Bacteria	Firmicutes	Clostridia	Clostridiales	Eubacteriaceae	Anaerofustis	Anaerofustis stercorihominis
1209957912	12341577415	11450520728	10778180057	0.2811149825		Bacteria	Actinobacteria	Actinobacteria	Bifidobacteriales	Bifidobacteriaceae	Bifidobacterium	Bifidobacterium tissieri
0.9918489103	-13739502212	11725049754	-1171807583	0.2412743175		Bacteria	Firmicutes	Bacilli	Bacillales	Thermoactinomycetaceae	Kroppenstedtia	Kroppenstedtia pulmonis
22327423689	0.7917247626	15104767186	0.5241555549	0.600170351		Bacteria	Firmicutes	Bacilli	Lactobacillales	Streptococcaceae	Streptococcus	Streptococcus intermedius
0.5457377343	-0.3711335989	16748952033	-0.2215861614	0.8246360563		Bacteria	Firmicutes	Tissierellia	Tissierellales	Peptoniphilaceae	Parvimonas	Parvimonas micra
0.8189634516	24194519865	18652421492	12971248734	0.1945882245		Bacteria	Firmicutes	Tissierellia	Tissierellales	Peptoniphilaceae	Peptoniphilus	Peptoniphilus harei
20232854303	-0.4701688219	10047296996	-0.4679555329	0.6398163894		Bacteria	Firmicutes	Clostridia	Clostridiales	Catabacteriaceae	Catabacter	Catabacter hongkongensis
0.8817701833	28473074333	27969874064	10179907949	0.3086823306		Bacteria	Actinobacteria	Actinobacteria	Streptosporangiales	Streptosporangiaceae	Streptosporangium	Streptosporangium jiaoheense
0.5222360248	-0.0314994308	21852004768	-0.0144148929	0.9884989778		Bacteria	Firmicutes	Clostridia	Clostridiales	Peptostreptococcaceae	Peptostreptococcus	Peptostreptococcus stomatis
0.7575948342	-33328314564	17192655186	-19385205022	0.052559752		Bacteria	Firmicutes	Bacilli	Lactobacillales	Streptococcaceae	Streptococcus	Streptococcus porcorum
0	0	0	0	1		Bacteria	Bacteroidetes	Sphingobacteriia	Sphingobacteriales	Sphingobacteriaceae	Pedobacter	Pedobacter solisilvae
0.8742582035	17181949006	190659645	0.9011843595	0.3674903055		Bacteria	Firmicutes	Bacilli	Lactobacillales	Lactobacillaceae	Lactobacillus	Lactobacillus secaliphilus
0.5754026757	15515904117	31556816142	0.491681545	0.6229444866		Bacteria	Bacteroidetes	Bacteroidia	Bacteroidales	Prevotellaceae	Metaprevotella	Metaprevotella massiliensis
18232411658	0.9008477239	18303325062	0.4921770885	0.6225941598		Bacteria	Bacteroidetes	Bacteroidia	Bacteroidales	Prevotellaceae	Prevotella	Prevotella oris
20129049982	0.5510259366	0.6015056753	0.9160777017	0.3596261422		Bacteria	Firmicutes	Clostridia	Clostridiales	Lachnospiraceae	Bariatricus	Bariatricus massiliensis
13568981775	-0.5337577771	16636248507	-0.3208402284	0.7483314718		Bacteria	Actinobacteria	Coriobacteriia	Coriobacteriales	Coriobacteriaceae	Collinsella	Collinsella intestinalis
0.5319790507	15963597824	26541396032	0.601460368	0.547533401		Bacteria	Firmicutes	Bacilli	Lactobacillales	Leuconostocaceae	Weissella	Weissella viridescens
0.5156273012	0.4555838582	11353774839	0.4012620161	0.6882272259		Bacteria	Firmicutes	Clostridia	Clostridiales	Lachnospiraceae	Lachnoclostridium	populeti
0.8713434462	-0.6512705861	15954131633	-0.4082143742	0.683116296		Bacteria	Actinobacteria	Actinobacteria	Actinomycetales	Actinomycetaceae	Actinomyces	Actinomyces johnsonii
0.7745515407	23052458977	31538737509	0.7309252303	0.4648248242		Bacteria	Firmicutes	Bacilli	Lactobacillales	Enterococcaceae	Enterococcus	Enterococcus avium
0.4936737942	0.9902320101	12649220194	0.7828403608	0.4337208631		Bacteria	Firmicutes	Clostridia	Clostridiales	Lachnospiraceae	Anaerocolumna	Anaerocolumna aminovalerica
13658076994	17072048185	1045066868	16335842909	0.1023461685		Bacteria	Firmicutes	Clostridia	Clostridiales	Lachnospiraceae	Anaerotignum	Anaerotignum propionicum
0.1780355637	-17209839874	31592445464	-0.5447454169	0.5859286239		Bacteria	Firmicutes	Clostridia	Clostridiales	Peptococcaceae	Peptococcus	Peptococcus simiae
0.2720813546	13061182411	1950182685	0.6697414817	0.5030226032		Bacteria	Firmicutes	Clostridia	Clostridiales	Clostridiaceae	Tindallia	Tindallia californiensis
0.9752199618	0.9014782812	17095635258	0.5273148775	0.5979749445		Bacteria	Firmicutes	Clostridia	Clostridiales	Clostridiaceae	Clostridium	Clostridium tertium
0.2404921454	0.7335471661	31703990134	0.2313737681	0.8170244423		Bacteria	Firmicutes	Bacilli	Lactobacillales	Lactobacillaceae	Lactobacillus	Lactobacillus acidophilus
0.2067329847	0.3617406851	27856892975	0.1298567954	0.8966797271		Bacteria	Synergistetes	Synergistia	Synergistales	Synergistaceae	Cloacibacillus	Cloacibacillus evryensis
0.3387085315	-0.9983978706	31540154639	-0.316548185	0.7515864576		Bacteria	Tenericutes	Mollicutes	Entomoplasmatales	Spiroplasmataceae	Spiroplasma	Spiroplasma clarkii
0.2116675827	11069103375	31683498486	0.3493649346	0.7268153549		Bacteria	Firmicutes	Clostridia	Clostridiales	Lachnospiraceae	Acetitomaculum	Acetitomaculum ruminis
0.2700961609	0.8301238856	31674971936	0.2620756499	0.7932631194		Bacteria	Proteobacteria	Gammaproteobacteria	Enterobacterales	Enterobacteriaceae	Raoultella	Raoultella terrigena
0.3243141508	-10284842844	14522663442	-0.7081926043	0.4788256583		Bacteria	Firmicutes	Clostridia	Clostridiales	Clostridiaceae	Caloramator	Caloramator australicus
0.7422204391	10835195441	2035305885	0.532362016	0.5944752876		Bacteria	Firmicutes	Bacilli	Lactobacillales	Lactobacillaceae	Lactobacillus	Lactobacillus johnsonii
12334414093	0.6678673091	14627757361	0.4565753264	0.6479763172		Bacteria	Firmicutes	Clostridia	Clostridiales	Clostridiaceae	Thermotalea	Thermotalea metallivorans
11048139676	-25782216992	11444110744	-22528807672	0.0242666678		Bacteria	Proteobacteria	Gammaproteobacteria	Enterobacterales	Enterobacteriaceae	Kosakonia	Kosakonia sacchari
0.4918057987	-0.9212862722	27943928849	-0.3296910314	0.7416334311		Bacteria	Bacteroidetes	Bacteroidia	Bacteroidales	Prevotellaceae	Prevotella	Prevotella oryzae
0.9400282926	2047239697	17867623973	11457817224	0.2518854797		Bacteria	Bacteroidetes	Bacteroidia	Bacteroidales	Prevotellaceae	Prevotella	Prevotella jejuni
20732030824	25762813651	21374425493	12053102274	0.2280835629		Bacteria	Firmicutes	Bacilli	Lactobacillales	Lactobacillaceae	Lactobacillus	Lactobacillus satsumensis
0.931334545	29135446095	27985841532	10410780773	0.2978393132		Bacteria	Actinobacteria	Actinobacteria	Kineosporiales	Kineosporiaceae	Angustibacter	Angustibacter luteus
0.3061283111	-0.9777020025	31115486561	-0.3142171666	0.7533561054		Bacteria	Firmicutes	Bacilli	Lactobacillales	Enterococcaceae	Enterococcus	Enterococcus casseliflavus
0.2513263231	0.0262672542	31718854473	0.0082812745	0.9933925744		Bacteria	Firmicutes	Clostridia	Clostridiales	Eubacteriaceae	Eubacterium	Eubacterium callanderi
21675100855	0.7681597566	12749001777	0.6025254134	0.546824452		Bacteria	Actinobacteria	Actinobacteria	Bifidobacteriales	Bifidobacteriaceae	Bifidobacterium	Bifidobacterium pseudolongum
0.2050074814	10552664781	31686960925	0.3330286172	0.7391126815		Bacteria	Tenericutes	Mollicutes	Entomoplasmatales	Spiroplasmataceae	Spiroplasma	Spiroplasma cantharicola
0.9505370949	-15931551915	15327883855	-1039383653	0.2986263435		Bacteria	Firmicutes	Bacilli	Lactobacillales	Streptococcaceae	Streptococcus	Streptococcus troglodytidis
0.9676189074	0.2211188841	17839249201	0.1239507793	0.9013542468		Bacteria	Bacteroidetes	Bacteroidia	Bacteroidales	Bacteroidaceae	Bacteroides	Bacteroides caecicola
0.7831921425	10336598202	28628610689	0.3610583243	0.7180558471		Bacteria	Bacteroidetes	Bacteroidia	Bacteroidales	Prevotellaceae	Prevotella	Prevotella disiens
0.9614514497	0.6966560993	15998823293	0.4354420863	0.6632415674		Bacteria	Actinobacteria	Actinobacteria	Bifidobacteriales	Bifidobacteriaceae	Bifidobacterium	Bifidobacterium choerinum
0.1094499394	0.1517176523	31718854445	0.0478320087	0.9618501265		Bacteria	Firmicutes	Erysipelotrichia	Erysipelotrichales	Erysipelotrichaceae	Erysipelothrix	Erysipelothrix inopinata
16434104429	-0.1989776619	12962818691	-0.1534987618	0.8780049666		Bacteria	Proteobacteria	Gammaproteobacteria	Enterobacterales	Enterobacteriaceae	Escherichia	Escherichia coli
0.8790103002	-15204914823	11903970247	-12772977844	0.2014971355		Bacteria	Actinobacteria	Actinobacteria	Actinomycetales	Actinomycetaceae	Actinomyces	Actinomyces graevenitzii
0.4740956415	-13854366901	1478411916	-0.9371114201	0.3487012477		Bacteria	Actinobacteria	Actinobacteria	Bifidobacteriales	Bifidobacteriaceae	Bifidobacterium	Bifidobacterium avesanii
18883772606	0.8969687749	0.8665553111	10350969678	0.3006236285		Bacteria	Actinobacteria	Coriobacteriia	Eggerthellales	Eggerthellaceae	Asaccharobacter	Asaccharobacter celatus
10025768139	13703647715	15426849461	0.8882985311	0.3743801896		Bacteria	Firmicutes	Clostridia	Clostridiales	Clostridiaceae	Clostridium	Clostridium chartatabidum
21116895081	0.6613717139	0.6907628586	0.9574511797	0.3383395767		Bacteria	Firmicutes	Clostridia	Clostridiales	Lachnospiraceae	Eisenbergiella	Eisenbergiella massiliensis
0.0932774124	0.5332188116	317121926	0.168143155	0.8664706598		Bacteria	Proteobacteria	Alphaproteobacteria	Kiloniellales	Kiloniellaceae	Kiloniella	Kiloniella majae
0.5109474452	-0.4111106145	11424260161	-0.3598575389	0.7189536718		Bacteria	Firmicutes	Clostridia	Clostridiales	Lachnospiraceae	Sellimonas	Sellimonas intestinalis
0.9702385245	-0.0153090918	10286000319	-0.0148834253	0.9881251831		Bacteria	Firmicutes	Clostridia	Clostridiales	Peptococcaceae	Desulfosporosinus	Desulfosporosinus fructosivorans
0.232009677	10769882668	31685557548	0.3398987899	0.733932748		Bacteria	Actinobacteria	Coriobacteriia	Coriobacteriales	Coriobacteriaceae	Enorma	massiliensis
0.1781010878	-0.3455020105	26441893513	-0.1306646252	0.8960406174		Bacteria	Firmicutes	Clostridia	Clostridiales	Peptococcaceae	Desulfosporosinus	Desulfosporosinus nitroreducens
0.9991241886	-0.0444247267	0.9467541721	-0.0469231909	0.9625744448		Bacteria	Firmicutes	Clostridia	Clostridiales	Lachnospiraceae	Lachnospira	Lachnospira multipara
0.9797554634	-0.1596418286	0.9735002694	-0.1639874519	0.869741022		Bacteria	Firmicutes	Clostridia	Clostridiales	Christensenellaceae	Christensenella	Christensenella timonensis
0.3307346578	15263791215	31647428574	0.4823074702	0.6295875413		Bacteria	Actinobacteria	Coriobacteriia	Eggerthellales	Eggerthellaceae	Slackia	Slackia equolifaciens
14349534724	14448118862	14855299481	0.9725902114	0.3307570096		Bacteria	Firmicutes	Clostridia	Clostridiales	Peptostreptococcaceae	Paeniclostridium	Paeniclostridium ghonii
17260925383	0.8793715903	0.8555259994	10278724327	0.3040098386		Bacteria	Firmicutes	Clostridia	Clostridiales	Lachnospiraceae	Oribacterium	Oribacterium sinus
0.5969824445	15311347758	16987852285	0.9013115667	0.3674226856		Bacteria	Firmicutes	Tissierellia	Tissierellales	Peptoniphilaceae	Anaerococcus	Anaerococcus senegalensis
106038856	27378702071	28589617066	0.9576449383	0.3382418306		Bacteria	Bacteroidetes	Bacteroidia	Bacteroidales	Porphyromonadaceae	Porphyromonas	Porphyromonas asaccharolytica
0.3950484927	0.2249107172	16057388502	0.1400668092	0.8886072045		Bacteria	Firmicutes	Clostridia	Clostridiales	Clostridiaceae	Mordavella	Mordavella massiliensis
0.9822664953	-0.3994456154	21533753163	-0.1854974432	0.8528388855		Bacteria	Firmicutes	Bacilli	Lactobacillales	Streptococcaceae	Streptococcus	Streptococcus pharyngis
10778622388	0.0324112109	1307745317	0.024784039	0.9802272222		Bacteria	Firmicutes	Bacilli	Lactobacillales	Streptococcaceae	Streptococcus	Streptococcus danieliae
0.2444674726	0.7827323524	27461039567	0.2850337659	0.775618273		Bacteria	Proteobacteria	Gammaproteobacteria	Pseudomonadales	Pseudomonadaceae	Pseudomonas	Pseudomonas aeruginosa
17128175835	0.9349080684	18123414904	0.5158564615	0.6059546646		Bacteria	Bacteroidetes	Bacteroidia	Bacteroidales	Porphyromonadaceae	Porphyromonas	Porphyromonas gingivalis
0.1865328813	-0.6121900408	26457420441	-0.2313868966	0.817014244		Bacteria	Bacteroidetes	Bacteroidia	Bacteroidales	Porphyromonadaceae	Porphyromonas	Porphyromonas bennonis
0.4247367814	-0.1743473149	15658775315	-0.1113416033	0.9113454658		Bacteria	Actinobacteria	Actinobacteria	Corynebacteriales	Corynebacteriaceae	Corynebacterium	Corynebacterium durum
0.1155303585	0.1305195573	22648265986	0.0576289405	0.9540441968		Bacteria	Firmicutes	Clostridia	Clostridiales	Clostridiaceae	Crassaminicella	Crassaminicella profunda
0.0609839053	0.1517176523	31718854445	0.0478320087	0.9618501265		Bacteria	Firmicutes	Bacilli	Lactobacillales	Aerococcaceae	Abiotrophia	Abiotrophia defectiva
11107780404	13824196088	13084006861	10565720604	0.2907069373		Bacteria	Actinobacteria	Coriobacteriia	Eggerthellales	Eggerthellaceae	Eggerthella	Eggerthella timonensis
0.1823431469	0.4820003261	26865041248	0.1794154424	0.8576115068		Bacteria	Actinobacteria	Actinobacteria	Bifidobacteriales	Bifidobacteriaceae	Bifidobacterium	Bifidobacterium biavatii
0.8280083688	-15113949121	0.9811180989	-15404821435	0.1234428721		Bacteria	Synergistetes	Synergistia	Synergistales	Synergistaceae	Thermanaerovibrio	Thermanaerovibrio velox
0.8910031981	0.6704479187	19130547729	0.350459343	0.7259939973		Bacteria	Firmicutes	Clostridia	Clostridiales	Lachnospiraceae	Cellulosilyticum	Cellulosilyticum lentocellum
1234604457	-16469531596	25402007713	-0.6483555073	0.5167550405		Bacteria	Proteobacteria	Alphaproteobacteria	Rhodospirillales	Acetobacteraceae	Gluconacetobacter	Gluconacetobacter tumulisoli
0.6160727281	-0.2776842267	18959393053	-0.1464626141	0.8835562013		Bacteria	Firmicutes	Negativicutes	Selenomonadales	Selenomonadaceae	Mitsuokella	Mitsuokella multacida
0.4975008534	-26818395656	31438275254	-0.8530492032	0.3936320191		Bacteria	Bacteroidetes	Bacteroidia	Bacteroidales	Lentimicrobiaceae	Lentimicrobium	Lentimicrobium saccharophilum
0.3468944073	-0.6689020131	13648194626	-0.4901029267	0.6240610672		Bacteria	Actinobacteria	Actinobacteria	Micrococcales	Bogoriellaceae	Georgenia	Georgenia halophila
0.5361904147	21496235056	31583080951	0.6806250185	0.4961087922		Bacteria	Bacteroidetes	Bacteroidia	Bacteroidales	Prevotellaceae	Prevotella	Prevotella buccalis
0.4817681094	-0.7660303611	23415373208	-0.3271484739	0.7435555902		Bacteria	Firmicutes	Clostridia	Clostridiales	Peptostreptococcaceae	Romboutsia	Romboutsia sedimentorum
0.5171929473	-29961811979	21939099966	-13656809999	0.1720391105		Bacteria	Proteobacteria	Gammaproteobacteria	Enterobacterales	Enterobacteriaceae	Salmonella	Salmonella enterica;Salmonella enterica subsp. indica
0.1395585929	-0.0096018355	31710962999	-0.003027923	0.9975840707		Bacteria	Actinobacteria	Actinobacteria	Actinomycetales	Actinomycetaceae	Actinobaculum	Actinobaculum massiliense
0.5530017171	0.9665175988	24551441034	0.3936704153	0.6938243864		Bacteria	Firmicutes	Tissierellia	Unclassified	Unclassified	Unclassified	Unclassified
0.3553697307	16462308225	19933503079	0.8258612728	0.4088827913		Bacteria	Firmicutes	Bacilli	Lactobacillales	Lactobacillaceae	Lactobacillus	Lactobacillus hominis
0.4062375649	-0.8039670383	17883482706	-0.4495584286	0.653028869		Bacteria	Firmicutes	Clostridia	Clostridiales	Clostridiaceae	Clostridium	Clostridium swellfunianum
12571833094	0.5495151094	15743538942	0.3490416681	0.7270580278		Bacteria	Firmicutes	Clostridia	Clostridiales	Clostridiaceae	Clostridium	Clostridium tepidum
0.2968658748	0.637755832	27670462815	0.2304825316	0.8177168359		Bacteria	Actinobacteria	Actinobacteria	Bifidobacteriales	Bifidobacteriaceae	Parascardovia	Parascardovia denticolens
0.2631715652	-0.3254236619	25831186754	-0.125980918	0.8997470295		Bacteria	Firmicutes	Bacilli	Lactobacillales	Enterococcaceae	Enterococcus	Enterococcus pallens
0.3676382603	0.3015573714	14268180961	0.2113495562	0.8326145159		Bacteria	Actinobacteria	Actinobacteria	Bifidobacteriales	Bifidobacteriaceae	Bifidobacterium	Bifidobacterium callitrichos
12730246092	-0.1676905282	0.8617288309	-0.1945977925	0.8457078314		Bacteria	Firmicutes	Clostridia	Clostridiales	Ruminococcaceae	Ruminococcus	Ruminococcus gauvreauii
0.4166418201	15054124582	15508959107	0.9706727884	0.3317112466		Bacteria	Firmicutes	Bacilli	Lactobacillales	Streptococcaceae	Streptococcus	Streptococcus cristatus
0.4190779525	-0.2566728468	1801462373	-0.1424802708	0.886700662		Bacteria	Firmicutes	Clostridia	Clostridiales	Hungateiclostridiaceae	Thermoclostridium	Thermoclostridium stercorarium
0.0840908264	0.1517176523	31718854445	0.0478320087	0.9618501265		Bacteria	Firmicutes	Bacilli	Lactobacillales	Lactobacillaceae	Lactobacillus	Lactobacillus algidus
0.5762672566	-10156855058	12045460517	-0.8432101906	0.3991109001		Bacteria	Firmicutes	Clostridia	Clostridiales	Lachnospiraceae	Lachnoclostridium	saccharolyticum
0.633118585	-0.2543817658	11733070975	-0.2168074891	0.8283583753		Bacteria	Firmicutes	Clostridia	Clostridiales	Ruminococcaceae	Caproiciproducens	Caproiciproducens galactitolivorans
0.793051784	2339239203	19567346932	11954810282	0.2318991443		Bacteria	Proteobacteria	Gammaproteobacteria	Enterobacterales	Enterobacteriaceae	Raoultella	Raoultella ornithinolytica
0.077731177	0.4156435954	31716238773	0.1310507209	0.8957351839		Bacteria	Proteobacteria	Alphaproteobacteria	Rhodospirillales	Rhodospirillaceae	Novispirillum	Novispirillum itersonii;Novispirillum itersonii subsp. nipponicum
0.3055262798	0.2791383562	24944247771	0.1119049004	0.9108988111		Bacteria	Actinobacteria	Actinobacteria	Actinomycetales	Actinomycetaceae	Actinomyces	Actinomyces massiliensis
0.8095686509	2409557191	24301666673	0.9915193157	0.3214320653		Bacteria	Firmicutes	Clostridia	Clostridiales	Clostridiales Family XIII. Incertae Sedis	Casaltella	Casaltella massiliensis
0.4966557799	12555611187	2016744225	0.6225683471	0.533568217		Bacteria	Proteobacteria	Gammaproteobacteria	Enterobacterales	Enterobacteriaceae	Klebsiella	Klebsiella grimontii
0.4655044469	-0.1576638873	20855571544	-0.0755979701	0.9397389515		Bacteria	Bacteroidetes	Bacteroidia	Bacteroidales	Porphyromonadaceae	Porphyromonas	Porphyromonas pasteri
0.9497211549	21997483845	17461960111	1259737378	0.2077641168		Bacteria	Proteobacteria	Alphaproteobacteria	Kiloniellales	Kiloniellaceae	Kiloniella	Kiloniella litopenaei
0.3880507871	-0.693933973	15940036761	-0.4353402589	0.6633154668		Bacteria	Actinobacteria	Coriobacteriia	Coriobacteriales	Atopobiaceae	Olsenella	Olsenella profusa
15430133259	0.076715273	0.9577260472	0.0801014792	0.9361565463		Bacteria	Firmicutes	Clostridia	Clostridiales	Lachnospiraceae	Anaerocolumna	Anaerocolumna cellulosilytica
0.3469333583	-13162625889	1419628766	-0.9271878821	0.3538289934		Bacteria	Firmicutes	Clostridia	Clostridiales	Caldicoprobacteraceae	Caldicoprobacter	Caldicoprobacter algeriensis
12303632651	-0.4839084327	0.7516409707	-0.6438026286	0.519703429		Bacteria	Firmicutes	Clostridia	Clostridiales	Hungateiclostridiaceae	Hungateiclostridium	Hungateiclostridium clariflavum
0.7719288292	1952492432	14639028086	1333758239	0.1822831013		Bacteria	Firmicutes	Clostridia	Clostridiales	Hungateiclostridiaceae	Hungateiclostridium	Hungateiclostridium straminisolvens
0.8169962773	-15350096236	16822573263	-0.9124701671	0.3615212671		Bacteria	Proteobacteria	Gammaproteobacteria	Enterobacterales	Erwiniaceae	Pantoea	Pantoea beijingensis
0.6230986429	-0.0464584659	22188190823	-0.0209383749	0.9832948145		Bacteria	Firmicutes	Bacilli	Lactobacillales	Enterococcaceae	Enterococcus	Enterococcus canis
0.643530959	-0.4058377707	23938943947	-0.1695303567	0.8653794967		Bacteria	Proteobacteria	Gammaproteobacteria	Enterobacterales	Budviciaceae	Leminorella	Leminorella grimontii
13660131217	0.1680619913	12647411125	0.132882524	0.8942862881		Bacteria	Firmicutes	Bacilli	Lactobacillales	Streptococcaceae	Streptococcus	Streptococcus saliviloxodontae
0.2557193878	-0.0724288041	18256205231	-0.0396735265	0.9683534079		Bacteria	Firmicutes	Clostridia	Clostridiales	Peptostreptococcaceae	Peptoclostridium	Peptoclostridium acidaminophilum
19614725151	-0.2121486938	10892181095	-0.1947715448	0.8455717996		Bacteria	Bacteroidetes	Bacteroidia	Bacteroidales	Bacteroidaceae	Bacteroides	Bacteroides acidifaciens
0.2403685259	0.7820804155	31678291319	0.2468821338	0.8049994436		Bacteria	Bacteroidetes	Bacteroidia	Bacteroidales	Prevotellaceae	Prevotella	Prevotella bivia
0.4417231836	0.1093611441	20824450389	0.0525157409	0.9581177532		Bacteria	Actinobacteria	Actinobacteria	Actinomycetales	Actinomycetaceae	Actinomyces	Actinomyces bowdenii
0.2806281925	-12224174613	16417424247	-0.744585413	0.4565223889		Bacteria	Firmicutes	Clostridia	Clostridiales	Clostridiaceae	Beduini	Beduini massiliensis
0.4240034361	-10852164594	31579484973	-0.3436460285	0.7311125047		Bacteria	Firmicutes	Erysipelotrichia	Erysipelotrichales	Erysipelotrichaceae	Catenisphaera	Catenisphaera adipataccumulans
0.5226099282	-0.1566677585	10913872461	-0.1435491931	0.885856463		Bacteria	Firmicutes	Clostridia	Clostridiales	Eubacteriaceae	Eubacterium	Eubacterium uniforme
0.8466180391	-13845995362	14954851222	-0.9258530999	0.3545223275		Bacteria	Firmicutes	Clostridia	Clostridiales	Clostridiales Family XIII. Incertae Sedis	Unclassified	Unclassified
0.18018688	0.8160612984	31699923532	0.2574332072	0.7968443708		Bacteria	Proteobacteria	Gammaproteobacteria	Enterobacterales	Enterobacteriaceae	Citrobacter	Citrobacter braakii
0.1963095567	-0.7877170605	27593411691	-0.2854728764	0.7752818817		Bacteria	Firmicutes	Clostridia	Clostridiales	Peptococcaceae	Desulfosporosinus	Desulfosporosinus orientis
0.4478687109	14046815888	15963536053	0.8799313536	0.3788964983		Bacteria	Firmicutes	Clostridia	Clostridiales	Clostridiaceae	Clostridium	Clostridium neuense
0.3575055462	-13453778397	13231496709	-10167994365	0.3092488503		Bacteria	Bacteroidetes	Bacteroidia	Bacteroidales	Bacteroidaceae	Bacteroides	Bacteroides graminisolvens
0.231015462	0.9598977252	31692513464	0.3028783836	0.7619825454		Bacteria	Bacteroidetes	Bacteroidia	Bacteroidales	Prevotellaceae	Prevotella	Prevotella oulorum
0.1355203823	0.6004527174	31709642076	0.1893596641	0.8498109358		Bacteria	Proteobacteria	Gammaproteobacteria	Enterobacterales	Enterobacteriaceae	Kluyvera	Kluyvera ascorbata
0.2443610401	-0.2030479091	14972769113	-0.1356114607	0.8921284448		Bacteria	Firmicutes	Clostridia	Clostridiales	Hungateiclostridiaceae	Hungateiclostridium	Hungateiclostridium aldrichii
0.3484603398	14363559162	31655924848	0.4537399944	0.6500159773		Bacteria	Firmicutes	Bacilli	Lactobacillales	Lactobacillaceae	Lactobacillus	Lactobacillus alimentarius
0.0850461098	0.2779347266	31718694868	0.0876248937	0.930174816		Bacteria	Proteobacteria	Deltaproteobacteria	Desulfovibrionales	Desulfovibrionaceae	Desulfovibrio	Desulfovibrio termitidis
0.6047662664	14261030632	24652142209	0.5784905227	0.5629329941		Bacteria	Firmicutes	Bacilli	Lactobacillales	Lactobacillaceae	Lactobacillus	Lactobacillus faecis
10239842561	-21057808048	11723412242	-17962183375	0.0724597994		Bacteria	Actinobacteria	Actinobacteria	Bifidobacteriales	Bifidobacteriaceae	Bifidobacterium	Bifidobacterium ramosum
0.2627032496	-0.1043942706	31661446435	-0.0329720472	0.9736968786		Bacteria	Proteobacteria	Epsilonproteobacteria	Campylobacterales	Campylobacteraceae	Campylobacter	Campylobacter hominis
0.7678301997	19075404641	21059041181	0.9058059423	0.3650385752		Bacteria	Firmicutes	Tissierellia	Tissierellales	Peptoniphilaceae	Anaerococcus	Anaerococcus prevotii
0.4932408745	0.085363478	18501941115	0.0461375796	0.9632005937		Bacteria	Firmicutes	Clostridia	Clostridiales	Clostridiaceae	Clostridium	Clostridium moniliforme
18617479325	-1982108123	16252639294	-12195607662	0.222631427		Bacteria	Proteobacteria	Gammaproteobacteria	Enterobacterales	Enterobacteriaceae	Citrobacter	Citrobacter europaeus
0.5083053766	11264312356	12486290148	0.9021344389	0.3669854565		Bacteria	Firmicutes	Clostridia	Clostridiales	Lachnospiraceae	Anaerostipes	Anaerostipes butyraticus
0.0466387062	0.1517176523	31718854445	0.0478320087	0.9618501265		Bacteria	Proteobacteria	Alphaproteobacteria	Rhodospirillales	Rhodospirillaceae	Marispirillum	Marispirillum indicum
0.2269438001	0.6908490544	27128418917	0.2546587976	0.7989866419		Bacteria	Bacteroidetes	Bacteroidia	Bacteroidales	Bacteroidaceae	Bacteroides	Bacteroides salanitronis
0.372682722	0.1175909166	16340389804	0.0719633485	0.9426310759		Bacteria	Actinobacteria	Actinobacteria	Actinomycetales	Actinomycetaceae	Schaalia	Schaalia georgiae
0.4588884955	0.2512631176	13480790645	0.1863860394	0.8521420396		Bacteria	Proteobacteria	Deltaproteobacteria	Desulfovibrionales	Desulfovibrionaceae	Desulfovibrio	Desulfovibrio vulgaris
0.6708665718	21066493138	27845571689	0.756547338	0.4493211016		Bacteria	Firmicutes	Tissierellia	Tissierellales	Peptoniphilaceae	Peptoniphilus	Peptoniphilus lacrimalis
0.6148572829	-0.4239113335	19380403525	-0.2187319438	0.8268588639		Bacteria	Firmicutes	Bacilli	Lactobacillales	Enterococcaceae	Enterococcus	Enterococcus gallinarum
0.4421885639	14488918524	16321129871	0.8877399199	0.3746806673		Bacteria	Actinobacteria	Actinobacteria	Propionibacteriales	Propionibacteriaceae	Propionibacterium	Propionibacterium acidifaciens
0.2411666456	-16259443608	31364414966	-0.5184041732	0.6041763036		Bacteria	Proteobacteria	Gammaproteobacteria	Enterobacterales	Hafniaceae	Hafnia	Hafnia alvei
0.2837657047	-0.4498645163	25408596087	-0.1770520948	0.8594674702		Bacteria	Firmicutes	Bacilli	Lactobacillales	Lactobacillaceae	Lactobacillus	Lactobacillus graminis
0.788428363	-16494024016	13208535896	-12487397654	0.2117602714		Bacteria	Firmicutes	Bacilli	Lactobacillales	Streptococcaceae	Streptococcus	Streptococcus sanguinis
0.8094081573	20584576822	24596057944	0.8369055265	0.4026456737		Bacteria	Bacteroidetes	Bacteroidia	Bacteroidales	Porphyromonadaceae	Porphyromonas	Porphyromonas endodontalis
0.0338810391	0.0262672542	31718854473	0.0082812745	0.9933925744		Bacteria	Proteobacteria	Gammaproteobacteria	Enterobacterales	Erwiniaceae	Pantoea	Pantoea dispersa
0.3580307667	0.4868400578	26338086367	0.1848426082	0.8533524872		Bacteria	Proteobacteria	Gammaproteobacteria	Enterobacterales	Erwiniaceae	Erwinia	Erwinia tasmaniensis
0.0891285771	-0.0427545149	28037421606	-0.0152490894	0.9878334585		Bacteria	Firmicutes	Bacilli	Lactobacillales	Enterococcaceae	Enterococcus	Enterococcus massiliensis
0.6067760698	0.2821020231	31193202687	0.0904370179	0.9279399411		Bacteria	Proteobacteria	Betaproteobacteria	Burkholderiales	Oxalobacteraceae	Massilia	Massilia suwonensis
0.0175206506	-0.0991831438	317188545	-0.0312694596	0.9750546462		Bacteria	Proteobacteria	Gammaproteobacteria	Enterobacterales	Morganellaceae	Proteus	Proteus vulgaris
0.261839966	0.7353386805	15613809539	0.4709540478	0.6376735504		Bacteria	Firmicutes	Clostridia	Clostridiales	Lachnospiraceae	Herbinix	Herbinix hemicellulosilytica
0.1028414517	-0.941625543	27531072968	-0.3420228278	0.732333713		Bacteria	Actinobacteria	Actinobacteria	Bifidobacteriales	Bifidobacteriaceae	Bifidobacterium	Bifidobacterium asteroides
0.1455911327	0.2829683761	18841195964	0.1501859949	0.880617875		Bacteria	Actinobacteria	Acidimicrobiia	Acidimicrobiales	Acidimicrobiaceae	Aciditerrimonas	Aciditerrimonas ferrireducens
0.0209848836	-0.5121702288	31711122822	-0.1615112248	0.8716907713		Bacteria	Bacteroidetes	Bacteroidia	Bacteroidales	Barnesiellaceae	Barnesiella	Barnesiella viscericola
0.1040523354	0.3564747	31706177264	0.1124306778	0.9104819322		Bacteria	Firmicutes	Bacilli	Lactobacillales	Streptococcaceae	Streptococcus	Streptococcus panodentis
0.7080573587	11600280157	14043983175	0.8259964436	0.4088061092		Bacteria	Firmicutes	Bacilli	Lactobacillales	Enterococcaceae	Enterococcus	Enterococcus columbae
0.1593970725	0.3715318433	22159271761	0.167664284	0.8668473956		Bacteria	Bacteroidetes	Bacteroidia	Bacteroidales	Bacteroidaceae	Bacteroides	Bacteroides zoogleoformans
0.2097742986	0.868423777	31697385402	0.2739733155	0.7841051285		Bacteria	Actinobacteria	Coriobacteriia	Coriobacteriales	Coriobacteriaceae	Enorma	Enorma phocaeensis
0.3540273181	-15657432482	22601819049	-0.6927509882	0.4884658348		Bacteria	Firmicutes	Bacilli	Lactobacillales	Lactobacillaceae	Lactobacillus	Lactobacillus panis
0.1146922295	-0.1835270721	19535264808	-0.0939465495	0.9251516162		Bacteria	Firmicutes	Bacilli	Bacillales	Thermoactinomycetaceae	Salinithrix	Salinithrix halophila
0.435628796	-2248874481	16991619642	-13235197871	0.1856625805		Bacteria	Proteobacteria	Gammaproteobacteria	Enterobacterales	Enterobacteriaceae	Escherichia	Escherichia albertii
0.2805818108	-25531642161	31461829804	-0.8115116737	0.4170718918		Bacteria	Firmicutes	Clostridia	Clostridiales	Clostridiaceae	Clostridium	Clostridium punense
0.4112790107	-30344890455	31082314452	-0.9762751259	0.328928143		Bacteria	Proteobacteria	Gammaproteobacteria	Enterobacterales	Yersiniaceae	Serratia	Serratia aquatilis
0.2864054869	-25511623085	31462212695	-0.8108655082	0.4174429099		Bacteria	Proteobacteria	Gammaproteobacteria	Enterobacterales	Enterobacteriaceae	Shigella	Shigella boydii
0.4697212889	-0.2563113937	22876083454	-0.1120433899	0.910789003		Bacteria	Proteobacteria	Gammaproteobacteria	Enterobacterales	Erwiniaceae	Phaseolibacter	Phaseolibacter flectens
0.1448600279	0.4156435954	31716238773	0.1310507209	0.8957351839		Bacteria	Firmicutes	Bacilli	Lactobacillales	Streptococcaceae	Streptococcus	Streptococcus minor
0.0317913747	-0.0991831438	317188545	-0.0312694596	0.9750546462		Bacteria	Firmicutes	Bacilli	Bacillales	Bacillaceae	Bacillus	Bacillus populi
0.2091151268	-0.6189152079	21497275319	-0.2879040245	0.7734202062		Bacteria	Firmicutes	Clostridia	Clostridiales	Hungateiclostridiaceae	Mageeibacillus	Mageeibacillus indolicus
0.8742487074	0.2411801062	20572341294	0.1172351278	0.9066737308		Bacteria	Firmicutes	Bacilli	Lactobacillales	Streptococcaceae	Streptococcus	Streptococcus uberis
0.0437634143	-0.6910666252	31700690355	-0.2179973425	0.827431182		Bacteria	Firmicutes	Bacilli	Lactobacillales	Lactobacillaceae	Lactobacillus	Lactobacillus nagelii
10453131284	23836128221	18086183727	13179191686	0.1875307081		Bacteria	Firmicutes	Clostridia	Clostridiales	Clostridiaceae	Clostridium	Clostridium chauvoei
0.8160286766	-15252920032	12595870664	-12109460663	0.2259160758		Bacteria	Actinobacteria	Coriobacteriia	Eggerthellales	Eggerthellaceae	Raoultibacter	Raoultibacter massiliensis
0.5518694968	0.6610612129	30869323589	0.2141482663	0.8304314377		Bacteria	Firmicutes	Erysipelotrichia	Erysipelotrichales	Erysipelotrichaceae	Absiella	Absiella tortuosum
0.3769522457	-27356723934	31408697998	-0.870991976	0.3837585343		Bacteria	Firmicutes	Clostridia	Clostridiales	Lachnospiraceae	Cuneatibacter	Cuneatibacter caecimuris
0.1247008709	-0.2201253194	27803704744	-0.0791712189	0.9368964367		Bacteria	Firmicutes	Clostridia	Clostridiales	Lachnospiraceae	Stomatobaculum	Stomatobaculum longum
0.3028395882	14424479392	22983073589	0.6276131578	0.530257387		Bacteria	Firmicutes	Tissierellia	Tissierellales	Peptoniphilaceae	Peptoniphilus	Peptoniphilus coxii
0.1419059879	0.221395206	31710898841	0.0698167551	0.944339511		Bacteria	Actinobacteria	Actinobacteria	Micrococcales	Dermatophilaceae	Kineosphaera	Kineosphaera limosa
0.3051025568	-0.1335877805	24645766174	-0.0542031356	0.9567733225		Bacteria	Actinobacteria	Actinobacteria	Bifidobacteriales	Bifidobacteriaceae	Bifidobacterium	Bifidobacterium gallicum
0.1286361132	-0.4509729945	26916955631	-0.1675423479	0.8669433296		Bacteria	Firmicutes	Bacilli	Lactobacillales	Enterococcaceae	Tetragenococcus	Tetragenococcus halophilus
0.0310924708	0.0262672542	31718854473	0.0082812745	0.9933925744		Bacteria	Proteobacteria	Alphaproteobacteria	Rhodospirillales	Acetobacteraceae	Acetobacter	Acetobacter malorum
0.1577640977	0.2608378071	2668156947	0.0977595442	0.9221232325		Bacteria	Firmicutes	Clostridia	Clostridiales	Clostridiaceae	Caloramator	Caloramator boliviensis
0.1610396758	0.881409598	31696675947	0.2780763508	0.7809537494		Bacteria	Bacteroidetes	Bacteroidia	Bacteroidales	Prevotellaceae	Prevotella	Prevotella saccharolytica
0.0512864369	-0.2612691517	31711122724	-0.0823903821	0.9343362841		Bacteria	Actinobacteria	Actinobacteria	Bifidobacteriales	Bifidobacteriaceae	Bifidobacterium	Bifidobacterium animalis
0.1093046137	-0.6853961756	27746453351	-0.2470211839	0.8048918296		Bacteria	Actinobacteria	Coriobacteriia	Coriobacteriales	Coriobacteriaceae	Collinsella	Collinsella phocaeensis
0.1076797006	-0.4838317211	27693862317	-0.1747072025	0.8613097081		Bacteria	Firmicutes	Clostridia	Clostridiales	Clostridiaceae	Clostridium	Clostridium putrefaciens
0.0303015533	0.0262672542	31718854473	0.0082812745	0.9933925744		Bacteria	Bacteroidetes	Bacteroidia	Bacteroidales	Porphyromonadaceae	Porphyromonas	Porphyromonas somerae
0.049993155	-0.3867199287	31711122759	-0.1219508788	0.9029379209		Bacteria	Bacteroidetes	Bacteroidia	Bacteroidales	Bacteroidaceae	Bacteroides	Bacteroides caecigallinarum
0.0944611792	-0.5769955607	27811043581	-0.2074699423	0.8356428645		Bacteria	Firmicutes	Clostridia	Clostridiales	Lachnospiraceae	Syntrophococcus	Syntrophococcus sucromutans
1387795744	0.9306803909	17259131657	0.5392394064	0.5897216729		Bacteria	Firmicutes	Clostridia	Clostridiales	Peptostreptococcaceae	Paeniclostridium	tenue
0.0510502011	-0.2612691517	31711122724	-0.0823903821	0.9343362841		Bacteria	Firmicutes	Clostridia	Clostridiales	Lachnospiraceae	Lachnoanaerobaculum	Lachnoanaerobaculum saburreum
0.2708553518	-13507319392	31622985408	-0.4271361232	0.6692801835		Bacteria	Proteobacteria	Gammaproteobacteria	Enterobacterales	Enterobacteriaceae	Kosakonia	Kosakonia radicincitans
0.1762664276	-0.8019708294	26222342159	-0.3058349344	0.7597303283		Bacteria	Firmicutes	Negativicutes	Veillonellales	Veillonellaceae	Dialister	Dialister propionicifaciens
0.2125376462	-0.8864052884	26931940256	-0.3291278979	0.7420590184		Bacteria	Bacteroidetes	Bacteroidia	Bacteroidales	Prevotellaceae	Prevotella	Prevotella amnii
0.3699431473	0.5392941374	25562578197	0.2109701664	0.8329105512		Bacteria	Actinobacteria	Actinobacteria	Actinomycetales	Actinomycetaceae	Schaalia	Schaalia turicensis
0.069405067	-0.1355624443	31711138485	-0.0427491572	0.9659014936		Bacteria	Firmicutes	Clostridia	Clostridiales	Lachnospiraceae	Hespellia	Hespellia stercorisuis
0.0983579615	-0.2612691517	31711122724	-0.0823903821	0.9343362841		Bacteria	Proteobacteria	Gammaproteobacteria	Enterobacterales	Morganellaceae	Cosenzaea	Cosenzaea myxofaciens
0.1492221804	-0.8075709378	2259212347	-0.3574568539	0.720749821		Bacteria	Firmicutes	Clostridia	Clostridiales	Lachnospiraceae	Lachnoclostridium	Lachnoclostridium phytofermentans
0.2502361106	-0.6058021976	13099050004	-0.462477964	0.6437386012		Bacteria	Firmicutes	Clostridia	Clostridiales	Defluviitaleaceae	Defluviitalea	Defluviitalea saccharophila
0.0495175465	-0.3867199287	31711122759	-0.1219508788	0.9029379209		Bacteria	Proteobacteria	Gammaproteobacteria	Chromatiales	Unclassified	Unclassified	Unclassified
21854513325	-47551994222	2446392668	-1943759677	0.0519244384		Bacteria	Firmicutes	Clostridia	Clostridiales	Lachnospiraceae	Robinsoniella	Robinsoniella peoriensis
0.1886152235	-0.324156045	2603790254	-0.1244939159	0.9009242173		Bacteria	Firmicutes	Clostridia	Clostridiales	Hungateiclostridiaceae	Ruminiclostridium	Ruminiclostridium josui
0.2621155773	0.9135232442	31694947064	0.288223622	0.7731755679		Bacteria	Bacteroidetes	Bacteroidia	Bacteroidales	Prevotellaceae	Prevotella	Prevotella dentalis
0.3122376351	0.9002375943	22134760796	0.4067076227	0.6842227412		Bacteria	Proteobacteria	Alphaproteobacteria	Parvularculales	Parvularculaceae	Hyphococcus	Hyphococcus flavus
0.0600924068	-0.3867199287	31711122759	-0.1219508788	0.9029379209		Bacteria	Actinobacteria	Actinobacteria	Bifidobacteriales	Bifidobacteriaceae	Bifidobacterium	Bifidobacterium stellenboschense
0.1191393795	-0.8341978229	2730661207	-0.3054929776	0.7599907176		Bacteria	Firmicutes	Bacilli	Lactobacillales	Lactobacillaceae	Lactobacillus	Lactobacillus sucicola
0.1017302327	-0.3145367044	27685729299	-0.1136096871	0.9095472079		Bacteria	Actinobacteria	Coriobacteriia	Eggerthellales	Eggerthellaceae	Slackia	Slackia exigua
0.1066781197	0.6123276984	31709202867	0.1931072506	0.8468749744		Bacteria	Firmicutes	Clostridia	Clostridiales	Clostridiaceae	Clostridium	Clostridium oryzae
0.2308945064	0.9754953227	31691711512	0.3078077125	0.7582286526		Bacteria	Proteobacteria	Gammaproteobacteria	Enterobacterales	Erwiniaceae	Pantoea	plantarum
0.2100579427	0.5057123835	22116767828	0.228655646	0.8191365708		Bacteria	Firmicutes	Clostridia	Clostridiales	Clostridiaceae	Clostridium	Clostridium amylolyticum
0.3004744584	14206444918	31657428349	0.4487554946	0.6536080471		Bacteria	Firmicutes	Bacilli	Lactobacillales	Streptococcaceae	Streptococcus	Streptococcus dentirousetti
0.3396885049	-0.7917369923	21434872333	-0.3693686531	0.7118529598		Bacteria	Actinobacteria	Actinobacteria	Bifidobacteriales	Bifidobacteriaceae	Bifidobacterium	Bifidobacterium saeculare
0.0396696773	-0.5384942353	31702196069	-0.1698602312	0.8651200575		Bacteria	Firmicutes	Clostridia	Clostridiales	Clostridiaceae	Oceanirhabdus	Oceanirhabdus sediminicola
0.1892338298	0.2278734794	20412886575	0.1116321685	0.9111150647		Bacteria	Firmicutes	Clostridia	Clostridiales	Eubacteriaceae	Alkalibaculum	Alkalibaculum bacchi
0.6517186858	-1742373329	1462555763	-11913209555	0.2335276104		Bacteria	Firmicutes	Clostridia	Clostridiales	Clostridiaceae	Caloramator	Caloramator fervidus
0.0807607818	-0.1349687928	28447616191	-0.0474446758	0.9621588229		Bacteria	Firmicutes	Clostridia	Clostridiales	Clostridiaceae	Clostridium	Clostridium merdae
0.043866785	-0.5121702288	31711122822	-0.1615112248	0.8716907713		Bacteria	Firmicutes	Bacilli	Lactobacillales	Lactobacillaceae	Lactobacillus	Lactobacillus animalis
14505110444	32215863739	25876202972	12449996537	0.2131318775		Bacteria	Actinobacteria	Coriobacteriia	Coriobacteriales	Coriobacteriaceae	Enorma	Enorma massiliensis
0.104413294	0.2779347266	31718694868	0.0876248937	0.930174816		Bacteria	Firmicutes	Clostridia	Clostridiales	Clostridiaceae	Clostridium	Clostridium isatidis
0.3231712496	-0.7043847095	31693384689	-0.2222497586	0.8241194608		Bacteria	Firmicutes	Bacilli	Lactobacillales	Enterococcaceae	Enterococcus	Enterococcus pseudoavium
0.617548477	23596160434	31564367793	0.747556884	0.4547274795		Bacteria	Proteobacteria	Alphaproteobacteria	Rhodospirillales	Rhodospirillaceae	Dongia	Dongia soli
0.0639065809	0.1517176523	31718854445	0.0478320087	0.9618501265		Bacteria	Firmicutes	Clostridia	Clostridiales	Eubacteriaceae	Eubacterium	Eubacterium limosum
0.4486144712	11719706246	1084955675	10802013867	0.280052511		Bacteria	Firmicutes	Clostridia	Clostridiales	Lachnospiraceae	Lachnoclostridium	amygdalinum
0.1499034333	0.1292505721	26528713243	0.0487210107	0.9611416317		Bacteria	Bacteroidetes	Bacteroidia	Bacteroidales	Bacteroidaceae	Bacteroides	Bacteroides stercorirosoris
0.6533999259	-0.3786429821	10727672006	-0.352959134	0.7241190775		Bacteria	Firmicutes	Bacilli	Bacillales	Thermoactinomycetaceae	Novibacillus	Novibacillus thermophilus
0.7532196326	0.7453520618	14095357251	0.5287926007	0.5969493313		Bacteria	Firmicutes	Clostridia	Clostridiales	Lachnospiraceae	Anaerocolumna	Anaerocolumna jejuensis
0.3154005654	-0.8312339354	14260792801	-0.5828805923	0.5599736865		Bacteria	Proteobacteria	Deltaproteobacteria	Desulfovibrionales	Desulfovibrionaceae	Desulfovibrio	Desulfovibrio idahonensis
10076108522	-26102921581	15296702897	-17064410388	0.0879259953		Bacteria	Firmicutes	Bacilli	Lactobacillales	Streptococcaceae	Lactococcus	Lactococcus taiwanensis
18571293598	0.3570845624	13948960381	0.2559936745	0.7979557216		Bacteria	Firmicutes	Clostridia	Clostridiales	Clostridiaceae	Clostridium	Clostridium oceanicum
0.0272084496	-0.5121702288	31711122822	-0.1615112248	0.8716907713		Bacteria	Firmicutes	Erysipelotrichia	Erysipelotrichales	Erysipelotrichaceae	Faecalicoccus	Faecalicoccus pleomorphus
0.0553070518	-0.2612691517	31711122724	-0.0823903821	0.9343362841		Bacteria	Firmicutes	Bacilli	Lactobacillales	Streptococcaceae	Streptococcus	Streptococcus downei
0.3231777321	-0.7557300214	22366672396	-0.3378821883	0.7354519707		Bacteria	Proteobacteria	Gammaproteobacteria	Enterobacterales	Enterobacteriaceae	Klebsiella	Klebsiella pneumoniae
0.2135349612	-17361794794	31566517976	-0.5500066497	0.5823148127		Bacteria	Firmicutes	Clostridia	Clostridiales	Hungateiclostridiaceae	Ruminiclostridium	Ruminiclostridium sufflavum
0.2744444897	0.5204580915	16959994937	0.3068739663	0.7589393055		Bacteria	Firmicutes	Clostridia	Clostridiales	Hungateiclostridiaceae	Hungateiclostridium	Hungateiclostridium cellulolyticum

## Sheet: T2D+HS vs T2D+F
baseMean	log2FoldChange	lfcSE	stat	pvalue	padj	Domain	Phylum	Class	Order	Family	Genus	Species
865760367826	-46550999619	0.9207446005	-50557993597	4.28592e+07	0.0001958664	Bacteria	Firmicutes	Bacilli	Lactobacillales	Lactobacillaceae	Lactobacillus	Lactobacillus gasseri
319020382363	31084180367	0.7199564328	43175085257	0.00001578	0.0036057372	Bacteria	Bacteroidetes	Bacteroidia	Bacteroidales	Rikenellaceae	Alistipes	Alistipes senegalensis
208872543452	48572311816	1193598896	40693998612	4.71344e+09	0.0071801392	Bacteria	Firmicutes	Bacilli	Lactobacillales	Streptococcaceae	Streptococcus	Streptococcus pasteurianus
4453294948	-40041359613	10072793066	-3975199267	7.03204e+09	0.0080341003	Bacteria	Firmicutes	Bacilli	Lactobacillales	Lactobacillaceae	Lactobacillus	Lactobacillus rhamnosus
86543003006	56820394944	14669014567	38734977517	0.0001072844	0.008186639	Bacteria	Bacteroidetes	Bacteroidia	Bacteroidales	Prevotellaceae	Massiliprevotella	Massiliprevotella massiliensis
728219028032	-5398127021	13937676069	-38730466931	0.0001074832	0.008186639	Bacteria	Firmicutes	Bacilli	Lactobacillales	Lactobacillaceae	Lactobacillus	Lactobacillus salivarius
6448503469907	35669136023	100260816	35576347218	0.0003742092	0.0229774285	Bacteria	Actinobacteria	Actinobacteria	Bifidobacteriales	Bifidobacteriaceae	Bifidobacterium	Bifidobacterium pseudocatenulatum
66949615771	-42223603169	11932236962	-35386158775	0.0004022307	0.0229774285	Bacteria	Actinobacteria	Coriobacteriia	Coriobacteriales	Coriobacteriaceae	Enorma	Enorma timonensis
313617177017	-30830627508	0.9120798801	-33802551927	0.0007241856	0.0328914612	Bacteria	Firmicutes	Bacilli	Lactobacillales	Streptococcaceae	Streptococcus	Streptococcus mutans
9546743548427	-16419936951	0.4878339467	-33658864995	0.000762981	0.0328914612	Bacteria	Firmicutes	Clostridia	Clostridiales	Lachnospiraceae	Unclassified	Unclassified
15586009377	3007898302	0.896360013	33556810417	0.0007916982	0.0328914612	Bacteria	Actinobacteria	Actinobacteria	Bifidobacteriales	Bifidobacteriaceae	Bifidobacterium	Bifidobacterium avesanii
5980059565335	-17280403076	0.5424923131	-3185372891	0.001445676	0.0547921132	Bacteria	Firmicutes	Bacilli	Lactobacillales	Streptococcaceae	Streptococcus	Streptococcus salivarius
22676292712	-24337196127	0.7693030056	-31635384172	0.0015586378	0.0547921132	Bacteria	Firmicutes	Bacilli	Lactobacillales	Streptococcaceae	Streptococcus	Streptococcus peroris
3228807521441	-10925421594	0.3516186092	-31071795711	0.0018888163	0.0616563596	Bacteria	Firmicutes	Clostridia	Clostridiales	Lachnospiraceae	Blautia	Blautia faecis
71445715713	-79457104204	25860213931	-30725617513	0.0021222992	0.0646593816	Bacteria	Actinobacteria	Coriobacteriia	Coriobacteriales	Coriobacteriaceae	Collinsella	Collinsella tanakaei
1547458341898	-16531101169	0.5606190608	-29487226397	0.0031909021	0.0877629049	Bacteria	Firmicutes	Clostridia	Clostridiales	Ruminococcaceae	Ruminococcus	Ruminococcus lactaris
25756815408	30971187421	10571810583	29296010535	0.0033939744	0.0877629049	Bacteria	Proteobacteria	Gammaproteobacteria	Enterobacterales	Enterobacteriaceae	Kosakonia	Kosakonia sacchari
75106772756	-67202969403	23096880169	-290961242	0.0036187721	0.0877629049	Bacteria	Firmicutes	Bacilli	Lactobacillales	Streptococcaceae	Streptococcus	Streptococcus sobrinus
2117592864	-17951678173	0.6177974946	-29057544471	0.0036636884	0.0877629049	Bacteria	Firmicutes	Clostridia	Clostridiales	Lachnospiraceae	Lachnoclostridium	aldenense
254164507597	-12341316354	0.4279424989	-28838725733	0.0039281767	0.0877629049	Bacteria	Firmicutes	Clostridia	Clostridiales	Lachnospiraceae	Lachnoclostridium	clostridioforme
14208169923	-39295925535	13665394654	-28755792665	0.0040328687	0.0877629049	Bacteria	Firmicutes	Bacilli	Lactobacillales	Lactobacillaceae	Lactobacillus	Lactobacillus fermentum
114202513599	-29060735881	1017372505	-2856449898	0.0042840761	0.0889919448	Bacteria	Firmicutes	Erysipelotrichia	Erysipelotrichales	Erysipelotrichaceae	Coprobacillus	Coprobacillus cateniformis
19743281635	38194680453	13635407732	28011395921	0.0050922486	0.0980922113	Bacteria	Actinobacteria	Coriobacteriia	Coriobacteriales	Atopobiaceae	Olsenella	Olsenella uli
1258739370575	-16514927249	0.5903654371	-27974075396	0.0051514509	0.0980922113	Bacteria	Firmicutes	Bacilli	Lactobacillales	Streptococcaceae	Streptococcus	Streptococcus sinensis
1097695935368	-33111290179	12035812553	-2751063963	0.0059402043	0.1085869351	Bacteria	Proteobacteria	Alphaproteobacteria	Rhodospirillales	Rhodospirillaceae	Rhodospirillum	Rhodospirillum rubrum
131112560795	-27468119095	10473454329	-26226417983	0.0087250952	0.1412006409	Bacteria	Firmicutes	Clostridia	Clostridiales	Lachnospiraceae	Lachnoclostridium	hylemonae
371030409127	20569178803	0.7847143317	26212314433	0.008761276	0.1412006409	Bacteria	Bacteroidetes	Bacteroidia	Bacteroidales	Bacteroidaceae	Bacteroides	Bacteroides salyersiae
80463663563	-12247320429	0.467690959	-26186780379	0.0088271216	0.1412006409	Bacteria	Firmicutes	Clostridia	Clostridiales	Lachnospiraceae	Lachnoclostridium	lavalense
22029956601	-44595899137	17063222776	-26135683583	0.0089602157	0.1412006409	Bacteria	Firmicutes	Bacilli	Lactobacillales	Lactobacillaceae	Lactobacillus	Lactobacillus crispatus
5856499680485	107945257	0.4150217374	26009542941	0.0092964839	0.1416164379	Bacteria	Firmicutes	Clostridia	Clostridiales	Lachnospiraceae	Anaerostipes	Anaerostipes hadrus
67735654963	35631335803	13862906536	25702644472	0.0101620909	0.1498088883	Bacteria	Firmicutes	Clostridia	Clostridiales	Clostridiales Family XIII. Incertae Sedis	Anaerovorax	Anaerovorax odorimutans
706148573236	-11933186409	0.4680506991	-25495499595	0.0107862056	0.1540404981	Bacteria	Bacteroidetes	Bacteroidia	Bacteroidales	Bacteroidaceae	Bacteroides	Bacteroides kribbi
18590334091	-45463620671	17958004406	-25316632986	0.0113522943	0.1572120755	Bacteria	Bacteroidetes	Bacteroidia	Bacteroidales	Prevotellaceae	Prevotella	Prevotella oralis
379916394006	-14100440777	0.5629220286	-25048656937	0.0122497899	0.1638014849	Bacteria	Firmicutes	Bacilli	Lactobacillales	Streptococcaceae	Streptococcus	Streptococcus thermophilus
117167965502	25944811048	10392756918	24964320106	0.0125449715	0.1638014849	Bacteria	Firmicutes	Erysipelotrichia	Erysipelotrichales	Erysipelotrichaceae	Faecalicoccus	Faecalicoccus acidiformans
112042099884	14718631635	0.6025194284	24428476394	0.0145718877	0.1838518888	Bacteria	Firmicutes	Clostridia	Clostridiales	Lachnospiraceae	Abyssivirga	Abyssivirga alkaniphila
10929700221	-21205789665	0.8717937903	-24324318322	0.0149978143	0.1838518888	Bacteria	Firmicutes	Clostridia	Clostridiales	Lachnospiraceae	Lachnoclostridium	symbiosum
31472598448	-21684983216	0.8940430849	-24254964423	0.0152874656	0.1838518888	Bacteria	Firmicutes	Clostridia	Clostridiales	Defluviitaleaceae	Defluviitalea	Defluviitalea raffinosedens
85074418578	37863703271	15681003124	24146225194	0.0157515245	0.1845755559	Bacteria	Verrucomicrobia	Verrucomicrobiae	Verrucomicrobiales	Verrucomicrobiaceae	Fucophilus	Fucophilus fucoidanolyticus
443466766195	16161569834	0.6763706785	23894545324	0.0168734123	0.1915992718	Bacteria	Bacteroidetes	Bacteroidia	Bacteroidales	Tannerellaceae	Parabacteroides	Parabacteroides johnsonii
25234342899	37974542376	15979787057	23764110397	0.0174819763	0.1915992718	Bacteria	Bacteroidetes	Bacteroidia	Bacteroidales	Prevotellaceae	Alloprevotella	Alloprevotella rava
5756502677	26583176907	11270355399	23586813341	0.0183399971	0.1915992718	Bacteria	Actinobacteria	Actinobacteria	Bifidobacteriales	Bifidobacteriaceae	Bifidobacterium	Bifidobacterium animalis;Bifidobacterium animalis subsp. lactis
85431617905	-10209504964	0.4336685848	-2354218249	0.0185617093	0.1915992718	Bacteria	Firmicutes	Clostridia	Clostridiales	Clostridiaceae	Falcatimonas	Falcatimonas natans
84628289464	61752962635	26254719733	23520709139	0.0186692154	0.1915992718	Bacteria	Bacteroidetes	Bacteroidia	Bacteroidales	Bacteroidaceae	Mediterranea	Mediterranea massiliensis
159071009694	-17568771	0.7492782338	-23447592906	0.0190393669	0.1915992718	Bacteria	Firmicutes	Bacilli	Lactobacillales	Streptococcaceae	Streptococcus	Streptococcus parasanguinis
203126958493	2801044626	12012541119	23317669411	0.0197129551	0.1915992718	Bacteria	Bacteroidetes	Bacteroidia	Bacteroidales	Rikenellaceae	Tidjanibacter	Tidjanibacter massiliensis
33673743318	-45855460227	19692321577	-23285959479	0.0198804809	0.1915992718	Bacteria	Bacteroidetes	Bacteroidia	Bacteroidales	Prevotellaceae	Prevotella	Prevotella shahii
35080243187815	-0.8381718315	0.3612284608	-23203371898	0.0203226438	0.1915992718	Bacteria	Bacteroidetes	Bacteroidia	Bacteroidales	Bacteroidaceae	Bacteroides	Bacteroides vulgatus
23856305295	-28072644545	12152714645	-23099896084	0.0208887294	0.1915992718	Bacteria	Firmicutes	Bacilli	Lactobacillales	Lactobacillaceae	Lactobacillus	Lactobacillus delbrueckii;Lactobacillus delbrueckii subsp. bulgaricus
22433423194	-11767051692	0.5096928982	-23086552181	0.0209627212	0.1915992718	Bacteria	Bacteroidetes	Bacteroidia	Bacteroidales	Bacteroidaceae	Bacteroides	Bacteroides barnesiae
349106804	20840322686	0.9077246524	22958859419	0.0216824038	0.1942913435	Bacteria	Firmicutes	Clostridia	Clostridiales	Lachnospiraceae	Butyrivibrio	Butyrivibrio crossotus
427647473571	0.9603432503	0.4206456233	22830220908	0.0224290671	0.1971169939	Bacteria	Firmicutes	Clostridia	Clostridiales	Clostridiaceae	Butyricicoccus	Butyricicoccus faecihominis
148024340656	-22894768519	10137001313	-2258534631	0.023912348	0.2040315362	Bacteria	Firmicutes	Clostridia	Clostridiales	Hungateiclostridiaceae	Ruminiclostridium	Ruminiclostridium hungatei
54331401247	10734811992	0.4759622217	22553916053	0.0241087592	0.2040315362	Bacteria	Firmicutes	Clostridia	Clostridiales	Lachnospiraceae	Blautia	Blautia marasmi
37961031148	-17915974278	0.801115366	-22363788087	0.0253269681	0.2075489576	Bacteria	Actinobacteria	Actinobacteria	Bifidobacteriales	Bifidobacteriaceae	Bifidobacterium	Bifidobacterium apri
198248434443	15410805474	0.6895936026	22347663053	0.025432695	0.2075489576	Bacteria	Firmicutes	Clostridia	Clostridiales	Lachnospiraceae	Blautia	Blautia caecimuris
3868075711	-39394116268	18041795432	-21834920154	0.0289995963	0.229385102	Bacteria	Firmicutes	Erysipelotrichia	Erysipelotrichales	Erysipelotrichaceae	Faecalitalea	Faecalitalea cylindroides
37338580253	-23718108546	10870082897	-2181962067	0.0291123324	0.229385102	Bacteria	Firmicutes	Clostridia	Clostridiales	Lachnospiraceae	Anaerostipes	Anaerostipes caccae
55810433317	54534654795	25092463183	21733480048	0.029754135	0.2304684695	Bacteria	Bacteroidetes	Bacteroidia	Bacteroidales	Odoribacteraceae	Odoribacter	Odoribacter laneus
129618295507	28359905708	13124138165	21608966128	0.0307033266	0.2327317305	Bacteria	Firmicutes	Bacilli	Lactobacillales	Streptococcaceae	Streptococcus	Streptococcus equinus
18558726091	30966950679	14361544015	21562410453	0.0310648481	0.2327317305	Bacteria	Firmicutes	Clostridia	Clostridiales	Peptostreptococcaceae	Peptostreptococcus	Peptostreptococcus stomatis
0.6524967892	15698132588	0.7299433817	21505959203	0.0315081076		Bacteria	Firmicutes	Clostridia	Clostridiales	Clostridiaceae	Caloramator	Caloramator australicus
43952045984028	0.9478651557	0.4499843745	21064401556	0.0351661363	0.2592084563	Bacteria	Firmicutes	Clostridia	Clostridiales	Ruminococcaceae	Faecalibacterium	Faecalibacterium prausnitzii
25457059436	-47610369429	22709046303	-20965375998	0.0360345281	0.2613933231	Bacteria	Firmicutes	Negativicutes	Veillonellales	Veillonellaceae	Megasphaera	Megasphaera micronuciformis
49864026212	1048486113	0.5028030599	20852818859	0.0370437207	0.2645153181	Bacteria	Firmicutes	Clostridia	Clostridiales	Eubacteriaceae	Intestinibacillus	Intestinibacillus massiliensis
165866169909	-0.7310889309	0.3555212292	-20563861478	0.0397453104	0.2784447386	Bacteria	Firmicutes	Clostridia	Clostridiales	Lachnospiraceae	Blautia	Blautia glucerasea
44836105801	-49260783164	24011448371	-20515540089	0.0402130257	0.2784447386	Bacteria	Firmicutes	Bacilli	Lactobacillales	Streptococcaceae	Lactococcus	Lactococcus garvieae;Lactococcus garvieae subsp. bovis
80214701028	-28093145879	13749718245	-20431797496	0.0410346476	0.2794862449	Bacteria	Firmicutes	Bacilli	Lactobacillales	Lactobacillaceae	Lactobacillus	Lactobacillus mucosae
175350416951	0.7962017219	0.390748202	20376337444	0.0415865747	0.2794862449	Bacteria	Firmicutes	Clostridia	Clostridiales	Lachnospiraceae	Lachnotalea	Lachnotalea glycerini
48184864582	31454654383	15678382305	20062436144	0.0448302626	0.2969192758	Bacteria	Firmicutes	Bacilli	Lactobacillales	Enterococcaceae	Enterococcus	Enterococcus faecalis
28136177742	21248684312	10797150558	19679899986	0.0490691885	0.3173740533	Bacteria	Proteobacteria	Gammaproteobacteria	Enterobacterales	Erwiniaceae	Erwinia	Erwinia iniecta
10508490258	-33537976195	17070878755	-19646309177	0.0494569708	0.3173740533	Bacteria	Bacteroidetes	Bacteroidia	Bacteroidales	Prevotellaceae	Prevotella	Prevotella oris
0.832048191	29745675829	15176779166	19599465409	0.050002039	0.3173740533	Bacteria	Proteobacteria	Gammaproteobacteria	Enterobacterales	Enterobacteriaceae	Shigella	Shigella boydii
65509408301	1458508009	0.7577366409	19248218052	0.0542516551	0.3396302243	Bacteria	Actinobacteria	Coriobacteriia	Coriobacteriales	Atopobiaceae	Atopobium	Atopobium parvulum
33421168287	-23817674966	12526003333	-19014584567	0.057241989	0.353507959	Bacteria	Proteobacteria	Gammaproteobacteria	Enterobacterales	Enterobacteriaceae	Enterobacter	Enterobacter tabaci
40228734713	-11880925068	0.6277463992	-1892631337	0.0584069134	0.3553479831	Bacteria	Firmicutes	Bacilli	Lactobacillales	Streptococcaceae	Streptococcus	Streptococcus vestibularis
18437173232	-30023206012	15951506557	-18821548865	0.0598149889	0.3553479831	Bacteria	Firmicutes	Bacilli	Lactobacillales	Lactobacillaceae	Lactobacillus	Lactobacillus satsumensis
164683907688	-0.8789105171	0.467075697	-18817303548	0.0598726361	0.3553479831	Bacteria	Firmicutes	Clostridia	Clostridiales	Lachnospiraceae	Merdimonas	Merdimonas faecis
11357812173	12719252629	0.6813456526	18667841471	0.0619317372	0.3628564602	Bacteria	Actinobacteria	Actinobacteria	Actinomycetales	Actinomycetaceae	Actinomyces	Actinomyces graevenitzii
13723465888	26042027015	14032466713	1855840997	0.0634762251	0.3671979096	Bacteria	Firmicutes	Tissierellia	Tissierellales	Peptoniphilaceae	Parvimonas	Parvimonas micra
3069670688259	-0.8175310677	0.4424590069	-1847699007	0.0646458977	0.3689773855	Bacteria	Firmicutes	Clostridia	Clostridiales	Ruminococcaceae	Ruminococcus	Ruminococcus faecis
220583941319	25920549073	14067961455	18425234641	0.0653986176	0.3689773855	Bacteria	Proteobacteria	Gammaproteobacteria	Enterobacterales	Enterobacteriaceae	Klebsiella	Klebsiella pneumoniae;Klebsiella pneumoniae subsp. ozaenae
8973558556176	14816851697	0.8125785934	1823436135	0.0682373616	0.3758278452	Bacteria	Bacteroidetes	Bacteroidia	Bacteroidales	Bacteroidaceae	Bacteroides	Bacteroides massiliensis
0.9607217814	-12316166893	0.6754867203	-18233025941	0.0682575736	0.3758278452	Bacteria	Firmicutes	Clostridia	Clostridiales	Lachnospiraceae	Lachnoclostridium	fimetarium
659213529702	15036670498	0.8384285517	17934349285	0.0729034068	0.3966292486	Bacteria	Firmicutes	Clostridia	Clostridiales	Ruminococcaceae	Agathobaculum	Agathobaculum desmolans
17999543633	-0.8619698522	0.4826258813	-17860000586	0.0740992486	0.3968359844	Bacteria	Firmicutes	Clostridia	Clostridiales	Lachnospiraceae	Bariatricus	Bariatricus massiliensis
1447083922931	-0.9505859067	0.5334517448	-1781952943	0.0747569058	0.3968359844	Bacteria	Firmicutes	Clostridia	Clostridiales	Hungateiclostridiaceae	Hungateiclostridium	Hungateiclostridium thermocellum
12978835535	19599521212	11033861459	17763066253	0.0756823918	0.3968359844	Bacteria	Firmicutes	Bacilli	Bacillales	Staphylococcaceae	Staphylococcus	Staphylococcus xylosus
121905770422	1131215689	0.6384275169	17718780269	0.0764148066	0.3968359844	Bacteria	Actinobacteria	Actinobacteria	Bifidobacteriales	Bifidobacteriaceae	Bifidobacterium	Bifidobacterium dentium
9299845733	-21756015981	12362482537	-1759841999	0.0784345998	0.4027484507	Bacteria	Proteobacteria	Gammaproteobacteria	Enterobacterales	Enterobacteriaceae	Enterobacter	Enterobacter cloacae
0.4767674705	-23821079257	13549594359	-17580658598	0.0787363039		Bacteria	Proteobacteria	Gammaproteobacteria	Enterobacterales	Enterobacteriaceae	Raoultella	Raoultella ornithinolytica
85869589124	-10112760133	0.580003892	-17435676334	0.0812345113	0.4104425557	Bacteria	Actinobacteria	Actinobacteria	Actinomycetales	Actinomycetaceae	Actinomyces	Actinomyces oris
13838115868	-11510684467	0.6613515197	-17404790226	0.0817749404	0.4104425557	Bacteria	Firmicutes	Clostridia	Clostridiales	Lachnospiraceae	Agathobacter	Agathobacter ruminis
16162205421	36611776209	21094098728	17356406965	0.0826273854	0.4104425557	Bacteria	Tenericutes	Mollicutes	Anaeroplasmatales	Anaeroplasmataceae	Asteroleplasma	Asteroleplasma anaerobium
72569728652	13415543248	0.7786201439	17229894902	0.0848904256	0.4171497259	Bacteria	Firmicutes	Clostridia	Clostridiales	Lachnospiraceae	Parasporobacterium	Parasporobacterium paucivorans
28105699612	-15379756534	0.8978137783	-17130230016	0.086708308	0.4215499657	Bacteria	Actinobacteria	Actinobacteria	Micrococcales	Micrococcaceae	Rothia	Rothia dentocariosa
49283625691	-22288449001	13147560546	-16952535737	0.0900273278	0.4330788296	Bacteria	Firmicutes	Bacilli	Lactobacillales	Lactobacillaceae	Lactobacillus	Lactobacillus caviae
34990662877	46627338812	27592516858	16898545012	0.091055794	0.4334635192	Bacteria	Bacteroidetes	Bacteroidia	Bacteroidales	Bacteroidaceae	Bacteroides	Bacteroides coprophilus
0.5099864153	-16053586675	0.9519480589	-1686393131	0.0917201036		Bacteria	Firmicutes	Bacilli	Lactobacillales	Lactobacillaceae	Lactobacillus	Lactobacillus plantarum
594788652003	-0.7881657692	0.4708843457	-16737990472	0.0941700997	0.4426865232	Bacteria	Firmicutes	Clostridia	Clostridiales	Lachnospiraceae	Hespellia	Hespellia porcina
10245040479	-31702431315	18984136755	-16699432649	0.0949305892	0.4426865232	Bacteria	Firmicutes	Bacilli	Lactobacillales	Lactobacillaceae	Lactobacillus	Lactobacillus secaliphilus
2040565693372	10280406716	0.6179668848	16635853747	0.0961953166	0.4440531282	Bacteria	Bacteroidetes	Bacteroidia	Bacteroidales	Bacteroidaceae	Bacteroides	Bacteroides xylanolyticus
630857190469	10730645351	0.6519347611	16459691968	0.099770101	0.4559493617	Bacteria	Firmicutes	Clostridia	Clostridiales	Ruminococcaceae	Negativibacillus	Negativibacillus massiliensis
0.5560553382	-22126802486	13467827462	-16429377751	0.1003958083		Bacteria	Bacteroidetes	Bacteroidia	Bacteroidales	Bacteroidaceae	Bacteroides	Bacteroides caecicola
106790039408	-0.6730727852	0.4127205631	-16308196037	0.1029283897	0.465725486	Bacteria	Bacteroidetes	Bacteroidia	Bacteroidales	Bacteroidaceae	Bacteroides	Bacteroides caecimuris
73085076992	0.893185766	0.554725855	16101390585	0.1073675019	0.4769217525	Bacteria	Firmicutes	Clostridia	Clostridiales	Ruminococcaceae	Fournierella	Fournierella massiliensis
9488167137194	-13904946458	0.8653983008	-16067684032	0.1081051819	0.4769217525	Bacteria	Verrucomicrobia	Verrucomicrobiae	Verrucomicrobiales	Akkermansiaceae	Akkermansia	Akkermansia muciniphila
38523481333	18081658085	11267100312	16048191268	0.1085336154	0.4769217525	Bacteria	Firmicutes	Clostridia	Clostridiales	Hungateiclostridiaceae	Saccharofermentans	Saccharofermentans acetigenes
62842361225	0.9635675996	0.6032412314	15973172081	0.1101950169	0.4773503729	Bacteria	Actinobacteria	Coriobacteriia	Eggerthellales	Eggerthellaceae	Adlercreutzia	Adlercreutzia equolifaciens
0.6414793144	-26684715929	16709547091	-15969742198	0.110271454		Bacteria	Bacteroidetes	Bacteroidia	Bacteroidales	Porphyromonadaceae	Porphyromonas	Porphyromonas endodontalis
12423131394	18926554656	11886263739	15923047873	0.1113162378	0.4773503729	Bacteria	Firmicutes	Clostridia	Clostridiales	Peptostreptococcaceae	Romboutsia	Romboutsia sedimentorum
0.7062270129	-27180926754	17140734685	-15857503924	0.1127959429		Bacteria	Actinobacteria	Actinobacteria	Bifidobacteriales	Bifidobacteriaceae	Scardovia	Scardovia wiggsiae
432792266976	0.8584198459	0.541863723	15841987744	0.1131484921	0.4773503729	Bacteria	Actinobacteria	Actinobacteria	Bifidobacteriales	Bifidobacteriaceae	Bifidobacterium	Bifidobacterium callitrichidarum
185845773553	11416506536	0.7219877469	15812604279	0.1138185037	0.4773503729	Bacteria	Proteobacteria	Deltaproteobacteria	Desulfovibrionales	Desulfovibrionaceae	Desulfovibrio	Desulfovibrio intestinalis
73601725806	14738594544	0.9323212114	15808494287	0.1139124696	0.4773503729	Bacteria	Bacteroidetes	Bacteroidia	Bacteroidales	Bacteroidaceae	Bacteroides	Bacteroides mediterraneensis
10662857391	14813162646	0.9395916009	15765533272	0.1148983392	0.4773503729	Bacteria	Actinobacteria	Actinobacteria	Bifidobacteriales	Bifidobacteriaceae	Bifidobacterium	Bifidobacterium callitrichos
0.6358386217	-26224294388	16691350522	-15711307693	0.1161522768		Bacteria	Proteobacteria	Alphaproteobacteria	Kiloniellales	Kiloniellaceae	Kiloniella	Kiloniella litopenaei
204808691539	-12071004537	0.7696429172	-15683902582	0.1167900832	0.4776204514	Bacteria	Firmicutes	Erysipelotrichia	Erysipelotrichales	Erysipelotrichaceae	Erysipelatoclostridium	Erysipelatoclostridium ramosum
15329313146	15506035052	0.9893712981	15672614601	0.1170535898	0.4776204514	Bacteria	Actinobacteria	Actinobacteria	Actinomycetales	Actinomycetaceae	Actinomyces	Actinomyces johnsonii
14021033069	-12277168411	0.7869153318	-1560163834	0.1187211698	0.4801378282	Bacteria	Firmicutes	Clostridia	Clostridiales	Lachnospiraceae	Anaerotignum	Anaerotignum propionicum
6558989329989	11937437748	0.7717372821	15468266241	0.1219050584	0.4869347054	Bacteria	Proteobacteria	Gammaproteobacteria	Enterobacterales	Enterobacteriaceae	Escherichia	Escherichia fergusonii
34979717601	21687080556	14043951342	15442292577	0.1225328033	0.4869347054	Bacteria	Proteobacteria	Gammaproteobacteria	Enterobacterales	Enterobacteriaceae	Raoultella	Raoultella planticola
5766757630303	-0.5429433099	0.3551684211	-15286925235	0.1263406866	0.4973404727	Bacteria	Bacteroidetes	Bacteroidia	Bacteroidales	Tannerellaceae	Parabacteroides	Parabacteroides distasonis
32907836846	14913052245	0.9780818615	15247243438	0.1273278672	0.4973404727	Bacteria	Proteobacteria	Gammaproteobacteria	Enterobacterales	Enterobacteriaceae	Escherichia	Escherichia coli
97212526684	1063895068	0.7003801114	15190252416	0.1287561425	0.4986572638	Bacteria	Firmicutes	Negativicutes	Veillonellales	Veillonellaceae	Veillonella	Veillonella dispar
10022649629	-0.9282604388	0.6145358307	-15105066173	0.1309142022	0.5027545411	Bacteria	Firmicutes	Clostridia	Clostridiales	Ruminococcaceae	Ruminococcus	Ruminococcus gauvreauii
3474388805521	0.9834827736	0.6557065068	14998825898	0.1336448186	0.5029933543	Bacteria	Firmicutes	Clostridia	Clostridiales	Oscillospiraceae	Oscillibacter	Oscillibacter valericigenes
132426583906	-0.6990768703	0.4662201296	-14994566428	0.1337552085	0.5029933543	Bacteria	Firmicutes	Clostridia	Clostridiales	Christensenellaceae	Christensenella	Christensenella minuta
1767053193	-16673111259	11134396126	-14974418972	0.1342783134	0.5029933543	Bacteria	Firmicutes	Bacilli	Lactobacillales	Leuconostocaceae	Weissella	Weissella confusa
0.7305103766	-28032706029	18882271274	-14846045596	0.1376486069	0.5114261249	Bacteria	Actinobacteria	Coriobacteriia	Coriobacteriales	Coriobacteriaceae	Enorma	Enorma massiliensis
10932810967	-29521011594	20187181854	-14623641778	0.1436414404	0.5293882117	Bacteria	Firmicutes	Negativicutes	Veillonellales	Veillonellaceae	Megasphaera	Megasphaera elsdenii
28438630517	-0.86700801	0.5981743749	-14494235233	0.1472193433	0.5382339193	Bacteria	Firmicutes	Clostridia	Clostridiales	Lachnospiraceae	Anaerotignum	Anaerotignum lactatifermentans
0.8075050818	-24677258086	17295478864	-14268039804	0.1536364036	0.5529654094	Bacteria	Actinobacteria	Actinobacteria	Kineosporiales	Kineosporiaceae	Angustibacter	Angustibacter luteus
10904096658	-19334899696	13579430513	-14238373014	0.154493575	0.5529654094	Bacteria	Bacteroidetes	Bacteroidia	Bacteroidales	Porphyromonadaceae	Porphyromonas	Porphyromonas gingivalis
16101134307	14310492418	10060040701	14225084017	0.1548787142	0.5529654094	Bacteria	Firmicutes	Clostridia	Clostridiales	Clostridiaceae	Fonticella	Fonticella tunisiensis
56290817109	-29252523697	20650655739	-14165421218	0.1566168407	0.5548364046	Bacteria	Firmicutes	Bacilli	Lactobacillales	Lactobacillaceae	Lactobacillus	Lactobacillus oris
940418048002	-0.7022053202	0.4991339717	-14068473796	0.1594726498	0.5606076996	Bacteria	Proteobacteria	Deltaproteobacteria	Desulfovibrionales	Desulfovibrionaceae	Desulfovibrio	Desulfovibrio simplex
0.9264485517	-18892840583	13475264283	-14020385936	0.1609037223	0.561320619	Bacteria	Firmicutes	Tissierellia	Tissierellales	Peptoniphilaceae	Finegoldia	Finegoldia magna
0.6716377469	-13585430421	0.9796316028	-13867897261	0.1655058908		Bacteria	Firmicutes	Clostridia	Clostridiales	Lachnospiraceae	Anaerocolumna	Anaerocolumna jejuensis
33333874791	0.858259931	0.6210152529	13820271354	0.1669633694	0.5771344646	Bacteria	Firmicutes	Clostridia	Clostridiales	Lachnospiraceae	Anaerosporobacter	Anaerosporobacter mobilis
1269168787	-14547675006	10551120085	-13787801568	0.1679625466	0.5771344646	Bacteria	Firmicutes	Bacilli	Lactobacillales	Streptococcaceae	Streptococcus	Streptococcus saliviloxodontae
44953421083	0.6607066238	0.4809497537	13737539499	0.1695180818	0.5781325626	Bacteria	Bacteroidetes	Bacteroidia	Bacteroidales	Bacteroidaceae	Bacteroides	Bacteroides faecichinchillae
53219753282	-0.6516339983	0.483481526	-13477950309	0.1777243166	0.6016297236	Bacteria	Firmicutes	Clostridia	Clostridiales	Ruminococcaceae	Ruthenibacterium	Ruthenibacterium lactatiformans
144497798722	0.7106292651	0.5369707538	13234040402	0.1857010489	0.6196882852	Bacteria	Firmicutes	Clostridia	Clostridiales	Ruminococcaceae	Paludicola	Paludicola psychrotolerans
0.3504355081	-2038774502	15409026886	-13231039942	0.1858007966		Bacteria	Actinobacteria	Actinobacteria	Propionibacteriales	Propionibacteriaceae	Propionibacterium	Propionibacterium acidifaciens
1562410596	39016914386	29673640666	13148677921	0.1885543389	0.6196882852	Bacteria	Actinobacteria	Coriobacteriia	Coriobacteriales	Atopobiaceae	Libanicoccus	Libanicoccus massiliensis
47911974025	18191089145	13843220532	1314079271	0.1888195291	0.6196882852	Bacteria	Proteobacteria	Alphaproteobacteria	Rhodospirillales	Rhodospirillaceae	Aestuariispira	Aestuariispira insulae
0.6998211121	11042330062	0.8459455064	13053240402	0.1917825314		Bacteria	Actinobacteria	Actinobacteria	Bifidobacteriales	Bifidobacteriaceae	Bifidobacterium	Bifidobacterium ramosum
8865848778	-11581855959	0.8880831556	-13041409339	0.1921855344	0.6196882852	Bacteria	Firmicutes	Clostridia	Clostridiales	Peptococcaceae	Peptococcus	Peptococcus niger
40832382575	0.7275304474	0.5589905063	13015076986	0.1930847311	0.6196882852	Bacteria	Firmicutes	Bacilli	Bacillales	Unclassified	Unclassified	Unclassified
242766749498	-14983160674	11529116859	-1299593096	0.1937404672	0.6196882852	Bacteria	Firmicutes	Clostridia	Clostridiales	Ruminococcaceae	Ruminococcus	Ruminococcus flavefaciens
102149680596	10463631631	0.8097416705	12922184954	0.1962814883	0.6196882852	Bacteria	Proteobacteria	Gammaproteobacteria	Enterobacterales	Enterobacteriaceae	Shigella	Shigella dysenteriae
2220294268785	-0.7024091967	0.5447406864	-12894377347	0.1972459499	0.6196882852	Bacteria	Firmicutes	Clostridia	Clostridiales	Lachnospiraceae	Blautia	torques
870233214359	-0.5559644989	0.4314277061	-12886620193	0.197515612	0.6196882852	Bacteria	Bacteroidetes	Bacteroidia	Bacteroidales	Bacteroidaceae	Bacteroides	Bacteroides ovatus
0.4193075929	-2327844025	18107850422	-12855440987	0.1986022169		Bacteria	Proteobacteria	Alphaproteobacteria	Rhodospirillales	Rhodospirillaceae	Dongia	Dongia soli
73118706876	-20433498696	15895535856	-12854866223	0.1986222886	0.6196882852	Bacteria	Bacteroidetes	Bacteroidia	Bacteroidales	Porphyromonadaceae	Porphyromonas	Porphyromonas gulae
42738082744	-10024907538	0.7816119673	-12825939158	0.1996343829	0.6196882852	Bacteria	Firmicutes	Bacilli	Lactobacillales	Streptococcaceae	Streptococcus	Streptococcus rubneri
3541904901573	-0.9734565785	0.7595508024	-12816214208	0.1999754821	0.6196882852	Bacteria	Actinobacteria	Actinobacteria	Bifidobacteriales	Bifidobacteriaceae	Bifidobacterium	Bifidobacterium longum
0.7299395254	-34033964951	26721824459	-12736392683	0.2027912888	0.6196882852	Bacteria	Bacteroidetes	Bacteroidia	Bacteroidales	Porphyromonadaceae	Porphyromonas	Porphyromonas asaccharolytica
0.513967999	15693461094	12327766057	12730174326	0.203011856		Bacteria	Proteobacteria	Gammaproteobacteria	Enterobacterales	Enterobacteriaceae	Escherichia	Escherichia albertii
0.7208274063	-27004952691	21286025655	-12686704944	0.2045586101		Bacteria	Firmicutes	Bacilli	Lactobacillales	Lactobacillaceae	Lactobacillus	Lactobacillus faecis
13044592149	36299689103	28612679324	1268657461	0.2045632606	0.6196882852	Bacteria	Proteobacteria	Betaproteobacteria	Burkholderiales	Sutterellaceae	Parasutterella	Parasutterella secunda
6457207609426	0.5559760422	0.4391831121	12659321977	0.2055373578	0.6196882852	Bacteria	Firmicutes	Clostridia	Clostridiales	Oscillospiraceae	Oscillibacter	Oscillibacter ruminantium
902720122621	-14863516364	11744684556	-12655526245	0.2056732965	0.6196882852	Bacteria	Firmicutes	Negativicutes	Acidaminococcales	Acidaminococcaceae	Acidaminococcus	Acidaminococcus intestini
65485753652	-14710429725	11634939004	-12643323459	0.2061107645	0.6196882852	Bacteria	Proteobacteria	Alphaproteobacteria	Kiloniellales	Kiloniellaceae	Kiloniella	Kiloniella antarctica
1048342409394	0.7101205213	0.5651428562	12565327749	0.2089228707	0.6229277109	Bacteria	Firmicutes	Clostridia	Clostridiales	Lachnospiraceae	Roseburia	Roseburia intestinalis
121272836492	22311269191	17803005121	12532305102	0.2101218294	0.6229277109	Bacteria	Firmicutes	Bacilli	Lactobacillales	Lactobacillaceae	Lactobacillus	Lactobacillus ruminis
0.7421791004	1972226675	15797779309	12484201965	0.2118772166	0.6229277109	Bacteria	Firmicutes	Clostridia	Clostridiales	Eubacteriaceae	Eubacterium	Eubacterium callanderi
0.372680713	-17569560971	14075095321	-12482729652	0.2119311111		Bacteria	Firmicutes	Clostridia	Clostridiales	Clostridiaceae	Clostridium	Clostridium neuense
2219216094646	1170886146	0.9395938637	12461619762	0.2127049355	0.6229277109	Bacteria	Firmicutes	Clostridia	Clostridiales	Vallitaleaceae	Vallitalea	Vallitalea pronyensis
10466659808	-16518422746	13293097052	-12426316215	0.2140036118	0.6229277109	Bacteria	Proteobacteria	Gammaproteobacteria	Enterobacterales	Enterobacteriaceae	Siccibacter	Siccibacter turicensis
403958521589	-26136590389	21180106622	-12340159969	0.2171969434	0.6282215387	Bacteria	Firmicutes	Negativicutes	Veillonellales	Veillonellaceae	Dialister	Dialister succinatiphilus
0.4898413507	19085398326	15500576169	1231270252	0.218221804		Bacteria	Proteobacteria	Gammaproteobacteria	Enterobacterales	Enterobacteriaceae	Salmonella	Salmonella enterica;Salmonella enterica subsp. indica
29348802888	-0.6621440524	0.5435594674	-12181630385	0.2231620224	0.6414153725	Bacteria	Bacteroidetes	Bacteroidia	Bacteroidales	Bacteroidaceae	Bacteroides	Bacteroides oleiciplenus
23640844738	12721012907	10514531955	12098506107	0.2263362218	0.6433344913	Bacteria	Firmicutes	Clostridia	Clostridiales	Eubacteriaceae	Eubacterium	Eubacterium ruminantium
26275418635	-0.6866750105	0.5680247048	-12088822982	0.2267080678	0.6433344913	Bacteria	Proteobacteria	Deltaproteobacteria	Desulfovibrionales	Desulfovibrionaceae	Desulfovibrio	Desulfovibrio alaskensis
17693899686	22277095487	18481240526	12053896196	0.2280529269	0.6433344913	Bacteria	Firmicutes	Erysipelotrichia	Erysipelotrichales	Erysipelotrichaceae	Breznakia	Breznakia pachnodae
0.8199101295	12590129915	10511820676	11977116338	0.2310292987	0.6477226357	Bacteria	Cyanobacteria	Unclassified	Unclassified	Unclassified	Unclassified	Unclassified
266622876587	0.6952265977	0.5822234068	11940890552	0.232443134	0.6477226357	Bacteria	Firmicutes	Clostridia	Clostridiales	Lachnospiraceae	Lachnoclostridium	xylanolyticum
87625685165	0.9279478364	0.7860809584	11804736223	0.2378118955	0.6586668864	Bacteria	Firmicutes	Clostridia	Clostridiales	Ruminococcaceae	Ethanoligenens	Ethanoligenens harbinense
263469998111	13988776657	11966770032	11689684534	0.2424163417	0.6649713492	Bacteria	Proteobacteria	Gammaproteobacteria	Enterobacterales	Enterobacteriaceae	Klebsiella	Klebsiella variicola
0.5726525147	-12684925449	10855873258	-11684850355	0.242611172		Bacteria	Firmicutes	Bacilli	Lactobacillales	Streptococcaceae	Streptococcus	Streptococcus cristatus
74211083585	0.9885955704	0.8467444263	11675253355	0.242998283	0.6649713492	Bacteria	Firmicutes	Clostridia	Clostridiales	Lachnospiraceae	Frisingicoccus	Frisingicoccus caecimuris
16419238234	0.8630949585	0.7418497838	11634362877	0.2446525338	0.6655131426	Bacteria	Firmicutes	Clostridia	Clostridiales	Christensenellaceae	Christensenella	Christensenella timonensis
2239393198528	0.6713174377	0.5818866696	11536910412	0.2486268581	0.6699328125	Bacteria	Bacteroidetes	Bacteroidia	Bacteroidales	Rikenellaceae	Alistipes	Alistipes onderdonkii
23086897667	0.7116936616	0.6176435738	11522724299	0.2492091425	0.6699328125	Bacteria	Firmicutes	Clostridia	Clostridiales	Hungateiclostridiaceae	Ruminiclostridium	Ruminiclostridium cellobioparum
0.5145165202	18064946741	1577186769	1145390457	0.2520474497		Bacteria	Firmicutes	Bacilli	Lactobacillales	Streptococcaceae	Streptococcus	Streptococcus porcorum
359779761443	13406465663	11756538383	11403412489	0.2541441592	0.675601085	Bacteria	Proteobacteria	Betaproteobacteria	Burkholderiales	Sutterellaceae	Sutterella	Sutterella wadsworthensis
18758930671	-1410899088	12375996857	-11400286412	0.254274369	0.675601085	Bacteria	Firmicutes	Bacilli	Lactobacillales	Leuconostocaceae	Leuconostoc	Leuconostoc gelidum
10139821614	19483762816	17210766544	11320682764	0.2576057308	0.6804960636	Bacteria	Firmicutes	Clostridia	Clostridiales	Clostridiaceae	Clostridium	Clostridium paraputrificum
0.7026364342	-14052788777	124330963	-1130272656	0.2583613528		Bacteria	Firmicutes	Tissierellia	Tissierellales	Peptoniphilaceae	Anaerococcus	Anaerococcus prevotii
0.7459954933	20446888472	18167382404	11254724548	0.2603888832	0.682107761	Bacteria	Firmicutes	Clostridia	Clostridiales	Peptococcaceae	Desulfosporosinus	Desulfosporosinus nitroreducens
138817841105	-0.4831412596	0.4300944968	-11233374598	0.2612942001	0.682107761	Bacteria	Firmicutes	Clostridia	Clostridiales	Lachnospiraceae	Eisenbergiella	Eisenbergiella tayi
11485077719623	0.3417002031	0.3052137364	11195439862	0.2629081367	0.682107761	Bacteria	Firmicutes	Clostridia	Clostridiales	Lachnospiraceae	Blautia	Blautia wexlerae
220414794655	0.8787423509	0.7870146468	11165514574	0.2641861569	0.682107761	Bacteria	Bacteroidetes	Bacteroidia	Bacteroidales	Bacteroidaceae	Bacteroides	Bacteroides clarus
0.7061078689	12282353482	11004811698	11160893815	0.2643838769		Bacteria	Actinobacteria	Actinobacteria	Corynebacteriales	Corynebacteriaceae	Corynebacterium	Corynebacterium durum
0.4504104317	11670321569	10473874712	11142315418	0.2651798671		Bacteria	Firmicutes	Clostridia	Clostridiales	Clostridiaceae	Beduini	Beduini massiliensis
0.3145673657	-10055000155	0.9034913315	-11129049948	0.2657492347		Bacteria	Proteobacteria	Deltaproteobacteria	Desulfovibrionales	Desulfovibrionaceae	Desulfovibrio	Desulfovibrio vulgaris
466845301899	10914525149	0.9826113124	11107673006	0.2666685249	0.6846489657	Bacteria	Firmicutes	Clostridia	Clostridiales	Peptostreptococcaceae	Intestinibacter	Intestinibacter bartlettii
0.4284583166	-17213662753	15517208961	-11093272505	0.2672890335		Bacteria	Firmicutes	Bacilli	Lactobacillales	Lactobacillaceae	Lactobacillus	Lactobacillus hominis
0.72693506	15571876256	14125872656	11023656121	0.2703027553	0.6862509895	Bacteria	Tenericutes	Mollicutes	Entomoplasmatales	Spiroplasmataceae	Spiroplasma	Spiroplasma clarkii
6751063715477	0.4082469178	0.3709373661	11005818101	0.2710787058	0.6862509895	Bacteria	Firmicutes	Clostridia	Clostridiales	Unclassified	Unclassified	Unclassified
0.7343315119	26689526918	24286771876	1098932664	0.2717974379	0.6862509895	Bacteria	Firmicutes	Clostridia	Clostridiales	Peptococcaceae	Peptococcus	Peptococcus simiae
10639600124	17727924669	16237456311	10917919857	0.2749245424	0.6903325049	Bacteria	Proteobacteria	Gammaproteobacteria	Enterobacterales	Erwiniaceae	Pantoea	Pantoea beijingensis
0.6973596054	-18800574214	17284320189	-108772425	0.2767168589		Bacteria	Bacteroidetes	Bacteroidia	Bacteroidales	Porphyromonadaceae	Porphyromonas	Porphyromonas pasteri
30788741744	-10120213703	0.9349748725	-1082404886	0.2790726582	0.6969191518	Bacteria	Bacteroidetes	Bacteroidia	Bacteroidales	Rikenellaceae	Alistipes	Alistipes timonensis
0.4781025057	20179905075	18645806407	10822758016	0.2791299951		Bacteria	Firmicutes	Bacilli	Bacillales	Bacillaceae	Bacillus	Bacillus populi
0.6231233465	25887000148	24043851706	10766577861	0.281633178		Bacteria	Proteobacteria	Betaproteobacteria	Burkholderiales	Sutterellaceae	Turicimonas	Turicimonas muris
0.5391756473	13403559523	12457567686	10759371219	0.2819553784		Bacteria	Firmicutes	Clostridia	Clostridiales	Peptostreptococcaceae	Peptoclostridium	Peptoclostridium acidaminophilum
13508187974515	10011535189	0.9376019892	10677809246	0.2856193446	0.7093915244	Bacteria	Bacteroidetes	Bacteroidia	Bacteroidales	Bacteroidaceae	Bacteroides	Bacteroides plebeius
10799361728	-11858971293	1128435779	-1050921241	0.2932947639	0.7245173357	Bacteria	Firmicutes	Clostridia	Clostridiales	Clostridiaceae	Clostridium	Clostridium tepidum
14541993791	-12062384808	11565427061	-10429692518	0.2969625338	0.7253176789	Bacteria	Firmicutes	Clostridia	Clostridiales	Clostridiaceae	Clostridium	Clostridium oceanicum
60257892773	0.734519896	0.7056896846	10408539503	0.2979433366	0.7253176789	Bacteria	Actinobacteria	Actinobacteria	Actinomycetales	Actinomycetaceae	Schaalia	Schaalia meyeri
0.5326287089	11530049693	11086095506	10400460367	0.2983185128		Bacteria	Actinobacteria	Actinobacteria	Bifidobacteriales	Bifidobacteriaceae	Bifidobacterium	Bifidobacterium biavatii
10678928763	-11143110606	10737285415	-10377958837	0.2993650936	0.7253176789	Bacteria	Firmicutes	Bacilli	Lactobacillales	Streptococcaceae	Streptococcus	Streptococcus danieliae
11519162925	0.9127726127	0.8828060071	10339447232	0.3011620055	0.7253176789	Bacteria	Firmicutes	Bacilli	Bacillales	Thermoactinomycetaceae	Kroppenstedtia	Kroppenstedtia pulmonis
29058493386	-0.8690223436	0.8438889753	-10297827901	0.3031119813	0.7253176789	Bacteria	Firmicutes	Negativicutes	Veillonellales	Veillonellaceae	Veillonella	Veillonella atypica
13214400297	-15938595423	15566655471	-10238933759	0.3058856393	0.7253176789	Bacteria	Firmicutes	Erysipelotrichia	Erysipelotrichales	Erysipelotrichaceae	Longicatena	Longicatena caecimuris
99407913595	17523273759	1714183347	10222520123	0.3066616393	0.7253176789	Bacteria	Proteobacteria	Alphaproteobacteria	Rhodospirillales	Rhodospirillaceae	Novispirillum	Novispirillum itersonii
3488834170862	-0.3082605383	0.3021281724	-10202972328	0.3075875153	0.7253176789	Bacteria	Firmicutes	Clostridia	Clostridiales	Lachnospiraceae	Kineothrix	Kineothrix alysoides
13849506452	-11738706504	11529322459	-10181610017	0.3086014493	0.7253176789	Bacteria	Firmicutes	Bacilli	Lactobacillales	Streptococcaceae	Streptococcus	Streptococcus lactarius
14621933033244	0.4197188544	0.4139590621	10139139176	0.3106238297	0.7253176789	Bacteria	Bacteroidetes	Bacteroidia	Bacteroidales	Bacteroidaceae	Bacteroides	Bacteroides uniformis
186534510369	0.6697375868	0.6611659679	10129643982	0.3110771665	0.7253176789	Bacteria	Firmicutes	Erysipelotrichia	Erysipelotrichales	Erysipelotrichaceae	Longibaculum	Longibaculum muris
16711223635	0.635717229	0.6312779226	10070322536	0.3139192749	0.7282289777	Bacteria	Firmicutes	Clostridia	Clostridiales	Hungateiclostridiaceae	Hungateiclostridium	Hungateiclostridium clariflavum
4571433524107	11616727366	11606886769	1000847824	0.3169003846	0.7314316958	Bacteria	Bacteroidetes	Bacteroidia	Bacteroidales	Bacteroidaceae	Bacteroides	Bacteroides coprocola
0.5700417904	-19047137581	19330355675	-0.9853485317	0.3244529016		Bacteria	Firmicutes	Bacilli	Lactobacillales	Lactobacillaceae	Lactobacillus	Lactobacillus johnsonii
0.2153005166	-13505020598	13713145751	-0.9848229461	0.3247110474		Bacteria	Firmicutes	Clostridia	Clostridiales	Lachnospiraceae	Herbinix	Herbinix hemicellulosilytica
1090996820409	0.5297955509	0.5385435868	0.9837561229	0.3252354377	0.7468974625	Bacteria	Firmicutes	Clostridia	Clostridiales	Clostridiales Family XIII. Incertae Sedis	Ihubacter	Ihubacter massiliensis
12532563482	12603152942	12944744319	0.9736115779	0.3302494355	0.75461996	Bacteria	Firmicutes	Bacilli	Lactobacillales	Streptococcaceae	Streptococcus	Streptococcus pharyngis
160621681492	0.4015342139	0.4162373765	0.9646760156	0.334707112	0.7579932817	Bacteria	Actinobacteria	Actinobacteria	Actinomycetales	Actinomycetaceae	Schaalia	Schaalia odontolytica
26154764747	-0.7522527913	0.7803404665	-0.9640058712	0.3350429823	0.7579932817	Bacteria	Bacteroidetes	Bacteroidia	Bacteroidales	Bacteroidaceae	Bacteroides	Bacteroides sartorii
0.606453342	-16854236296	17577213411	-0.9588685022	0.3376249943		Bacteria	Proteobacteria	Gammaproteobacteria	Enterobacterales	Hafniaceae	Obesumbacterium	Obesumbacterium proteus
26582072798	-0.7781973587	0.8148025793	-0.9550747364	0.3395399038	0.7643829362	Bacteria	Firmicutes	Erysipelotrichia	Erysipelotrichales	Erysipelotrichaceae	Holdemania	Holdemania massiliensis
57692201193	-12512358724	13171716829	-0.9499413695	0.3421420447	0.7664652667	Bacteria	Firmicutes	Negativicutes	Acidaminococcales	Acidaminococcaceae	Acidaminococcus	Acidaminococcus fermentans
98613560723	16750042922	1782112435	0.9398982125	0.3472697743	0.7741574968	Bacteria	Firmicutes	Erysipelotrichia	Erysipelotrichales	Erysipelotrichaceae	Absiella	Absiella dolichum
13481472246	10189631327	10886409827	0.935995566	0.3492754707	0.7748489811	Bacteria	Firmicutes	Clostridia	Clostridiales	Lachnospiraceae	Cellulosilyticum	Cellulosilyticum lentocellum
0.4270271548	-24969313616	26840873414	-0.9302720232	0.3522302593		Bacteria	Bacteroidetes	Bacteroidia	Bacteroidales	Prevotellaceae	Metaprevotella	Metaprevotella massiliensis
32675127457	-14243597187	15336994668	-0.9287084918	0.3530401787	0.7794172062	Bacteria	Bacteroidetes	Bacteroidia	Bacteroidales	Muribaculaceae	Muribaculum	Muribaculum intestinale
69551064378	-0.4794573383	0.5247721222	-0.9136486448	0.3609014969	0.7858439054	Bacteria	Bacteroidetes	Bacteroidia	Bacteroidales	Bacteroidaceae	Bacteroides	Bacteroides rodentium
350946775165	-0.4806645274	0.5267838099	-0.9124512151	0.3615312396	0.7858439054	Bacteria	Bacteroidetes	Bacteroidia	Bacteroidales	Bacteroidaceae	Bacteroides	Bacteroides finegoldii
412530265377	0.6791105521	0.7448921208	0.9116898046	0.3619320325	0.7858439054	Bacteria	Firmicutes	Clostridia	Clostridiales	Eubacteriaceae	Eubacterium	Eubacterium xylanophilum
0.4265094071	0.9383015841	10319520811	0.9092491805	0.3632186093		Bacteria	Proteobacteria	Deltaproteobacteria	Desulfovibrionales	Desulfovibrionaceae	Desulfovibrio	Desulfovibrio idahonensis
29738516891	-0.4730405539	0.52029103	-0.9091845268	0.3632527304	0.7858439054	Bacteria	Firmicutes	Clostridia	Clostridiales	Ruminococcaceae	Phocea	Phocea massiliensis
469899048312	0.5283772411	0.5865423383	0.9008339323	0.3676766231	0.7858439054	Bacteria	Firmicutes	Clostridia	Clostridiales	Lachnospiraceae	Anaerotaenia	Anaerotaenia torta
31657236342078	0.9191935652	10227896394	0.8987122374	0.3688059571	0.7858439054	Bacteria	Bacteroidetes	Bacteroidia	Bacteroidales	Prevotellaceae	Prevotella	Prevotella copri
37365500623	0.4435660799	0.4941794268	0.897581032	0.3694089551	0.7858439054	Bacteria	Firmicutes	Clostridia	Clostridiales	Lachnospiraceae	Blautia	Blautia producta
7773031236248	0.3115747018	0.3482739751	0.8946252779	0.3709874345	0.7858439054	Bacteria	Firmicutes	Clostridia	Clostridiales	Lachnospiraceae	Anaerobutyricum	Anaerobutyricum hallii
1205539087055	0.6731632234	0.7531449783	0.8938029766	0.3714273163	0.7858439054	Bacteria	Firmicutes	Clostridia	Clostridiales	Gracilibacteraceae	Gracilibacter	Gracilibacter thermotolerans
0.8822124497	-16072200371	18153019814	-0.8853733723	0.3759552889	0.7911192403	Bacteria	Actinobacteria	Actinobacteria	Streptosporangiales	Streptosporangiaceae	Streptosporangium	Streptosporangium jiaoheense
4435118169017	0.4025221336	0.4559976063	0.8827286108	0.3773829199	0.7911192403	Bacteria	Firmicutes	Clostridia	Clostridiales	Ruminococcaceae	Unclassified	Unclassified
59823516861	-0.5379419001	0.6166327745	-0.8723861629	0.3829977466	0.7956521466	Bacteria	Firmicutes	Clostridia	Clostridiales	Ruminococcaceae	Anaerotruncus	Anaerotruncus colihominis
235523335717	0.5924153274	0.6791168217	0.8723319884	0.3830272916	0.7956521466	Bacteria	Proteobacteria	Gammaproteobacteria	Enterobacterales	Enterobacteriaceae	Escherichia	Escherichia marmotae
51754357195	0.6535840537	0.7534341336	0.8674733789	0.3856826917	0.7975429416	Bacteria	Firmicutes	Clostridia	Clostridiales	Peptococcaceae	Desulfohalotomaculum	Desulfohalotomaculum halophilum
12713562709	-0.7538167238	0.8747869854	-0.8617146075	0.3888445852	0.8004593488	Bacteria	Firmicutes	Clostridia	Clostridiales	Peptostreptococcaceae	Paeniclostridium	Paeniclostridium ghonii
0.448786952	-23020904694	26794872956	-0.8591533437	0.3902559202		Bacteria	Bacteroidetes	Bacteroidia	Bacteroidales	Prevotellaceae	Prevotella	Prevotella disiens
391286108894	0.7931274063	0.9302896624	0.8525596256	0.3939035603	0.8021913709	Bacteria	Bacteroidetes	Bacteroidia	Bacteroidales	Barnesiellaceae	Coprobacter	Coprobacter fastidiosus
11104243065	-0.6481807272	0.7612315773	-0.8514895421	0.3944974702	0.8021913709	Bacteria	Firmicutes	Clostridia	Clostridiales	Lachnospiraceae	Lachnoclostridium	scindens
0.8288512098	0.676812757	0.798574488	0.8475261447	0.3967019207	0.8021913709	Bacteria	Synergistetes	Synergistia	Synergistales	Synergistaceae	Thermanaerovibrio	Thermanaerovibrio velox
53137044597	-0.6956553734	0.8208163809	-0.8475164356	0.39670733	0.8021913709	Bacteria	Firmicutes	Bacilli	Lactobacillales	Streptococcaceae	Streptococcus	Streptococcus gordonii
58638399228	0.6429479609	0.7630750321	0.8425750207	0.3994661662	0.8030377075	Bacteria	Firmicutes	Clostridia	Clostridiales	Clostridiaceae	Anoxynatronum	Anoxynatronum buryatiense
51121692036	0.4288718959	0.5109773986	0.8393167627	0.4012915792	0.8030377075	Bacteria	Firmicutes	Clostridia	Clostridiales	Ruminococcaceae	Harryflintia	Harryflintia acetispora
0.714443907	-10108250311	12058918878	-0.8382385198	0.4018967572		Bacteria	Proteobacteria	Gammaproteobacteria	Enterobacterales	Enterobacteriaceae	Citrobacter	Citrobacter europaeus
38137958392	-1420357352	16962586112	-0.8373471725	0.4023974508	0.8030377075	Bacteria	Firmicutes	Clostridia	Clostridiales	Lachnospiraceae	Faecalicatena	Faecalicatena fissicatena
157738072232	-0.6895726848	0.8323695337	-0.8284453682	0.4074183223	0.8095224926	Bacteria	Bacteroidetes	Bacteroidia	Bacteroidales	Odoribacteraceae	Butyricimonas	Butyricimonas virosa
0.3412394063	10759245723	13066900236	0.8233969441	0.4102823003		Bacteria	Actinobacteria	Actinobacteria	Bifidobacteriales	Bifidobacteriaceae	Bifidobacterium	Bifidobacterium saeculare
2252402724567	0.8415177107	10235524575	0.8221539644	0.4109892755	0.8130826793	Bacteria	Firmicutes	Clostridia	Clostridiales	Hungateiclostridiaceae	Anaerobacterium	Anaerobacterium chartisolvens
0.6271448448	0.7702923812	0.9457303557	0.81449472	0.4153615958		Bacteria	Firmicutes	Clostridia	Clostridiales	Clostridiales Family XIII. Incertae Sedis	Unclassified	Unclassified
1405963676168	-0.4708919048	0.5787938555	-0.8135744709	0.4158887678	0.8192291675	Bacteria	Actinobacteria	Coriobacteriia	Eggerthellales	Eggerthellaceae	Eggerthella	Eggerthella lenta
10720420361	18250156804	22855775801	0.798492117	0.4245849659	0.8327696542	Bacteria	Tenericutes	Mollicutes	Entomoplasmatales	Spiroplasmataceae	Spiroplasma	Spiroplasma cantharicola
53589238418	-0.4012596558	0.5070243959	-0.7914010825	0.4287099785	0.834843826	Bacteria	Firmicutes	Clostridia	Clostridiales	Clostridiales Family XIII. Incertae Sedis	Emergencia	Emergencia timonensis
0.8117910919	-14357923395	18165462018	-0.790396819	0.4292960593	0.834843826	Bacteria	Firmicutes	Clostridia	Clostridiales	Clostridiales Family XIII. Incertae Sedis	Casaltella	Casaltella massiliensis
13008325448	-0.620453267	0.7906262499	-0.7847617848	0.43259325	0.8375417514	Bacteria	Firmicutes	Erysipelotrichia	Erysipelotrichales	Erysipelotrichaceae	Dielma	Dielma fastidiosa
902444839494	-0.4164017241	0.5340424164	-0.7797165754	0.4355577202	0.8375417514	Bacteria	Firmicutes	Clostridia	Clostridiales	Lachnospiraceae	Coprococcus	Coprococcus catus
786618394246	0.4173452595	0.5361401681	0.7784256513	0.4363181215	0.8375417514	Bacteria	Firmicutes	Clostridia	Clostridiales	Eubacteriaceae	Eubacterium	Eubacterium ventriosum
4347403363	0.4409766915	0.5690480984	0.7749374661	0.4383766119	0.8375417514	Bacteria	Firmicutes	Clostridia	Clostridiales	Ruminococcaceae	Papillibacter	Papillibacter cinnamivorans
0.4069635305	-0.7432913875	0.9599773141	-0.7742801591	0.4387651342		Bacteria	Firmicutes	Clostridia	Clostridiales	Clostridiaceae	Mordavella	Mordavella massiliensis
45521887841	0.4362756207	0.5673844997	0.7689241086	0.4419383645	0.8375417514	Bacteria	Firmicutes	Clostridia	Clostridiales	Ruminococcaceae	Hydrogenoanaerobacterium	Hydrogenoanaerobacterium saccharovorans
0.4260375329	21103350664	27462761555	0.768435127	0.442228718		Bacteria	Bacteroidetes	Sphingobacteriia	Sphingobacteriales	Sphingobacteriaceae	Pedobacter	Pedobacter solisilvae
41076707106	-0.3747789446	0.4888296855	-0.7666861398	0.4432681463	0.8375417514	Bacteria	Firmicutes	Clostridia	Clostridiales	Lachnospiraceae	Pseudobutyrivibrio	Pseudobutyrivibrio ruminis
0.4907516904	-13873558197	18113467624	-0.765925028	0.4437209129		Bacteria	Firmicutes	Bacilli	Lactobacillales	Lactobacillaceae	Lactobacillus	Lactobacillus ultunensis
1817722277309	-0.4450600325	0.5828565186	-0.7635842069	0.4451150637	0.8375417514	Bacteria	Firmicutes	Clostridia	Clostridiales	Lachnospiraceae	Lachnoclostridium	Lachnoclostridium pacaense
258420898284	0.7327454356	0.9656695094	0.7587952487	0.4479750483	0.8375417514	Bacteria	Firmicutes	Clostridia	Clostridiales	Hungateiclostridiaceae	Ruminiclostridium	Ruminiclostridium papyrosolvens
27194732572	0.4159336697	0.5490774203	0.7575137028	0.4487421596	0.8375417514	Bacteria	Firmicutes	Clostridia	Clostridiales	Lachnospiraceae	Oribacterium	Oribacterium sinus
5230890407	-0.4608484542	0.6102758732	-0.7551477528	0.4501603336	0.8375417514	Bacteria	Actinobacteria	Actinobacteria	Bifidobacteriales	Bifidobacteriaceae	Bifidobacterium	Bifidobacterium saguini
41981672473	0.3783122088	0.5017334832	0.7540102892	0.4508430434	0.8375417514	Bacteria	Firmicutes	Clostridia	Clostridiales	Lachnospiraceae	Lachnoanaerobaculum	Lachnoanaerobaculum orale
0.282663952	-0.8014094363	10697041353	-0.7491879389	0.4537439377		Bacteria	Fusobacteria	Fusobacteriia	Fusobacteriales	Fusobacteriaceae	Fusobacterium	Fusobacterium nucleatum;Fusobacterium nucleatum subsp. animalis
0.4652142837	22108090677	29752188998	0.7430744232	0.4574366236		Bacteria	Proteobacteria	Gammaproteobacteria	Enterobacterales	Pectobacteriaceae	Pectobacterium	Pectobacterium carotovorum
28515138033	0.4028231864	0.5421722964	0.7429800252	0.4574937738	0.8441570397	Bacteria	Firmicutes	Bacilli	Lactobacillales	Carnobacteriaceae	Granulicatella	Granulicatella adiacens
14444773762	0.563665797	0.75967602	0.7419818213	0.4580983498	0.8441570397	Bacteria	Firmicutes	Clostridia	Clostridiales	Peptococcaceae	Desulfosporosinus	Desulfosporosinus fructosivorans
0.5766853873	-0.8110131462	11051510797	-0.7338482141	0.4630412518		Bacteria	Firmicutes	Bacilli	Lactobacillales	Streptococcaceae	Streptococcus	Streptococcus troglodytidis
0.508103674	0.8243725923	11266190869	0.731722551	0.4643379293		Bacteria	Bacteroidetes	Bacteroidia	Bacteroidales	Bacteroidaceae	Bacteroides	Bacteroides zoogleoformans
39499960264	-0.3522480372	0.4838781052	-0.7279685387	0.4666328454	0.8485798818	Bacteria	Bacteroidetes	Bacteroidia	Bacteroidales	Bacteroidaceae	Bacteroides	Bacteroides paurosaccharolyticus
11470924855	-0.6027853876	0.8281832833	-0.7278405635	0.4667111905	0.8485798818	Bacteria	Actinobacteria	Coriobacteriia	Eggerthellales	Eggerthellaceae	Eggerthella	Eggerthella timonensis
1203124018526	-0.5413663115	0.7451847693	-0.7264860124	0.4675408794	0.8485798818	Bacteria	Firmicutes	Bacilli	Lactobacillales	Lactobacillaceae	Lactobacillus	Lactobacillus rogosae
716189667079	0.5597126725	0.7724339628	0.7246090921	0.4686918795	0.8485798818	Bacteria	Actinobacteria	Actinobacteria	Bifidobacteriales	Bifidobacteriaceae	Bifidobacterium	Bifidobacterium adolescentis
15260887274	-0.4007829863	0.5562442306	-0.7205162127	0.4712072212	0.8485798818	Bacteria	Firmicutes	Clostridia	Clostridiales	Hungateiclostridiaceae	Ruminiclostridium	Ruminiclostridium cellulolyticum
101040282516	0.5230228103	0.7266083758	0.7198139021	0.4716395842	0.8485798818	Bacteria	Firmicutes	Clostridia	Clostridiales	Ruminococcaceae	Acetivibrio	Acetivibrio ethanolgignens
0.6447732557	-13851407593	19417410722	-0.7133498792	0.4756292795		Bacteria	Firmicutes	Tissierellia	Unclassified	Unclassified	Unclassified	Unclassified
4673966049763	-0.4051043799	0.5680632424	-0.7131325345	0.4757637489	0.8526432676	Bacteria	Bacteroidetes	Bacteroidia	Bacteroidales	Tannerellaceae	Parabacteroides	Parabacteroides merdae
0.4883598711	-21162964445	29699129055	-0.7125786216	0.4761065446		Bacteria	Firmicutes	Bacilli	Lactobacillales	Enterococcaceae	Enterococcus	Enterococcus avium
0.2739022502	14560293684	20479136398	0.7109818208	0.4770955012		Bacteria	Proteobacteria	Gammaproteobacteria	Enterobacterales	Morganellaceae	Proteus	Proteus vulgaris
292877820259	0.3409622817	0.4887623411	0.697603422	0.485425241	0.8616361356	Bacteria	Firmicutes	Clostridia	Clostridiales	Lachnospiraceae	Roseburia	Roseburia hominis
0.5033120364	-0.4758447988	0.6828222249	-0.6968794826	0.4858782189		Bacteria	Firmicutes	Clostridia	Clostridiales	Lachnospiraceae	Lachnoclostridium	amygdalinum
0.7249547461	-1363210387	19578824996	-0.6962677215	0.4862611837	0.8616361356	Bacteria	Firmicutes	Tissierellia	Tissierellales	Peptoniphilaceae	Peptoniphilus	Peptoniphilus lacrimalis
201060451099	0.3158616909	0.4586842974	0.6886254723	0.4910589872	0.8616361356	Bacteria	Firmicutes	Clostridia	Clostridiales	Lachnospiraceae	Faecalicatena	Faecalicatena orotica
72827645512	0.6003198716	0.87180472	0.688594427	0.4910785291	0.8616361356	Bacteria	Firmicutes	Clostridia	Clostridiales	Eubacteriaceae	Irregularibacter	Irregularibacter muris
0.7582725126	0.7597514044	11042336105	0.6880350292	0.4914307227	0.8616361356	Bacteria	Firmicutes	Clostridia	Clostridiales	Clostridiaceae	Clostridium	Clostridium quinii
2873261538	-0.4571509447	0.6674108851	-0.6849617753	0.4933680422	0.8616361356	Bacteria	Firmicutes	Clostridia	Clostridiales	Clostridiaceae	Lactonifactor	Lactonifactor longoviformis
1599512944114	0.3913111352	0.5720981482	0.6839930114	0.4939795788	0.8616361356	Bacteria	Firmicutes	Clostridia	Clostridiales	Lachnospiraceae	Roseburia	Roseburia inulinivorans
139439752328	-0.2916146878	0.4308067982	-0.6769036353	0.4984670975	0.866157656	Bacteria	Firmicutes	Clostridia	Clostridiales	Lachnospiraceae	Anaerotignum	Anaerotignum aminivorans
0.8293823227	0.5259571396	0.787105519	0.6682168107	0.5039952062	0.8722905831	Bacteria	Firmicutes	Clostridia	Clostridiales	Lachnospiraceae	Lachnoclostridium	populeti
0.8697943105	-0.543287812	0.8165201295	-0.6653697715	0.5058140143	0.8722905831	Bacteria	Firmicutes	Clostridia	Clostridiales	Hungateiclostridiaceae	Hungateiclostridium	Hungateiclostridium straminisolvens
0.4434538319	-0.7329375585	1104375626	-0.6636669094	0.5069035228		Bacteria	Firmicutes	Negativicutes	Selenomonadales	Selenomonadaceae	Mitsuokella	Mitsuokella multacida
0.6992116122	-11354605429	17130031583	-0.6628478981	0.5074279735		Bacteria	Firmicutes	Bacilli	Lactobacillales	Leuconostocaceae	Weissella	Weissella viridescens
4676074523	0.4204176969	0.6390389688	0.6578905472	0.5106084652	0.8771501518	Bacteria	Firmicutes	Clostridia	Clostridiales	Lachnospiraceae	Herbinix	Herbinix luporum
0.3923932358	-1070927762	16298447818	-0.6570734673	0.5111336784		Bacteria	Firmicutes	Clostridia	Clostridiales	Clostridiaceae	Clostridium	Clostridium moniliforme
0.2095043008	-17485695158	26698858993	-0.6549229374	0.5125173713		Bacteria	Firmicutes	Bacilli	Lactobacillales	Lactobacillaceae	Lactobacillus	Lactobacillus pontis
16390623542	-15718201588	24088473414	-0.6525196229	0.5140660182	0.8771501518	Bacteria	Bacteroidetes	Bacteroidia	Bacteroidales	Porphyromonadaceae	Gabonibacter	Gabonibacter massiliensis
14405403234	-0.6083036007	0.9329562528	-0.6520172826	0.5143900234	0.8771501518	Bacteria	Firmicutes	Clostridia	Clostridiales	Lachnospiraceae	Anaerocolumna	Anaerocolumna cellulosilytica
0.1743976783	-14555192656	22574511106	-0.6447622536	0.5190812665		Bacteria	Proteobacteria	Alphaproteobacteria	Parvularculales	Parvularculaceae	Hyphococcus	Hyphococcus flavus
118366093846	-0.3398230557	0.5325761694	-0.638074092	0.5234254506	0.8791490487	Bacteria	Firmicutes	Clostridia	Clostridiales	Ruminococcaceae	Acutalibacter	Acutalibacter muris
27869477439	0.8725461324	13811898022	0.6317351395	0.5275599624	0.8791490487	Bacteria	Bacteroidetes	Bacteroidia	Bacteroidales	Prevotellaceae	Prevotella	Prevotella histicola
826340549574	-0.4798823141	0.7616741559	-0.6300362306	0.5286708801	0.8791490487	Bacteria	Firmicutes	Clostridia	Clostridiales	Lachnospiraceae	Lachnospira	Lachnospira pectinoschiza
609888668966	1018544483	16173025983	0.6297797852	0.5288386733	0.8791490487	Bacteria	Firmicutes	Clostridia	Clostridiales	Lachnospiraceae	Tyzzerella	colinum
72112948548	-0.7868113014	12522510898	-0.6283175218	0.5297959555	0.8791490487	Bacteria	Actinobacteria	Coriobacteriia	Eggerthellales	Eggerthellaceae	Gordonibacter	Gordonibacter urolithinfaciens
460171248902	-0.2800237016	0.4473406038	-0.625974256	0.5313318272	0.8791490487	Bacteria	Firmicutes	Clostridia	Clostridiales	Ruminococcaceae	Flavonifractor	Flavonifractor plautii
0.2103745155	10900650611	17555859997	0.6209123685	0.5346572828		Bacteria	Actinobacteria	Actinobacteria	Bifidobacteriales	Bifidobacteriaceae	Bifidobacterium	Bifidobacterium scardovii
20043237658	-0.8861146234	14316604661	-0.6189418821	0.5359546463	0.8791490487	Bacteria	Firmicutes	Bacilli	Lactobacillales	Streptococcaceae	Streptococcus	Streptococcus intermedius
43215025267	-0.3527197162	0.5714540767	-0.6172319537	0.5370817422	0.8791490487	Bacteria	Firmicutes	Clostridia	Clostridiales	Lachnospiraceae	Muricomes	Muricomes intestini
1222942218963	0.8493074185	13802015282	0.6153502957	0.5383234088	0.8791490487	Bacteria	Actinobacteria	Coriobacteriia	Coriobacteriales	Coriobacteriaceae	Senegalimassilia	Senegalimassilia anaerobia
13154467433	-0.6881407205	11216109985	-0.6135288629	0.5395267042	0.8791490487	Bacteria	Firmicutes	Bacilli	Lactobacillales	Streptococcaceae	Streptococcus	Streptococcus constellatus;Streptococcus constellatus subsp. pharyngis
597401606526	0.6881802221	11238645574	0.6123337706	0.5403169507	0.8791490487	Bacteria	Actinobacteria	Coriobacteriia	Eggerthellales	Eggerthellaceae	Slackia	Slackia isoflavoniconvertens
0.7773133369	-0.5659121293	0.9242032197	-0.612324343	0.5403231869	0.8791490487	Bacteria	Actinobacteria	Actinobacteria	Bifidobacteriales	Bifidobacteriaceae	Bifidobacterium	Bifidobacterium choerinum
73312568573	-0.6188143293	10171173194	-0.6084001496	0.5429221123	0.8791490487	Bacteria	Firmicutes	Clostridia	Clostridiales	Ruminococcaceae	Drancourtella	Drancourtella massiliensis
4516204764567	-0.298770379	0.4924515875	-0.6067000018	0.544050021	0.8791490487	Bacteria	Firmicutes	Clostridia	Clostridiales	Lachnospiraceae	Roseburia	Roseburia faecis
0.7330139467	-0.6850612296	1130193277	-0.6061451997	0.5444183387	0.8791490487	Bacteria	Firmicutes	Bacilli	Lactobacillales	Enterococcaceae	Enterococcus	Enterococcus columbae
0.1420145165	-13878879824	22983988348	-0.603849933	0.5459434182		Bacteria	Firmicutes	Bacilli	Lactobacillales	Streptococcaceae	Lactococcus	Lactococcus taiwanensis
8992006299452	0.5592894922	0.9323096575	0.5998967057	0.548575078	0.8820276732	Bacteria	Firmicutes	Negativicutes	Acidaminococcales	Acidaminococcaceae	Phascolarctobacterium	Phascolarctobacterium faecium
11308258046	0.4021752593	0.6734888051	0.5971521074	0.5504058312	0.8820276732	Bacteria	Firmicutes	Erysipelotrichia	Erysipelotrichales	Erysipelotrichaceae	Holdemania	Holdemania filiformis
432227830634	0.4122157489	0.694947123	0.5931613143	0.5530731998	0.8820276732	Bacteria	Bacteroidetes	Bacteroidia	Bacteroidales	Rikenellaceae	Alistipes	Alistipes indistinctus
84058158119	12267870857	20785528146	0.5902121308	0.5550484403	0.8820276732	Bacteria	Actinobacteria	Coriobacteriia	Coriobacteriales	Atopobiaceae	Olsenella	Olsenella scatoligenes
3221877432	0.7987146853	13560173108	0.5890151099	0.5558511376	0.8820276732	Bacteria	Synergistetes	Synergistia	Synergistales	Synergistaceae	Cloacibacillus	Cloacibacillus porcorum
184732352158	-0.9206652959	15810252775	-0.5823216801	0.5603500249	0.8824041128	Bacteria	Firmicutes	Negativicutes	Veillonellales	Veillonellaceae	Megasphaera	Megasphaera massiliensis
6695357993779	-0.1820760429	0.3136902141	-0.580432652	0.5616228912	0.8824041128	Bacteria	Firmicutes	Clostridia	Clostridiales	Lachnospiraceae	Blautia	Blautia luti
3182118418961	0.3050591626	0.5297309687	0.5758756437	0.5646992396	0.8824041128	Bacteria	Bacteroidetes	Bacteroidia	Bacteroidales	Bacteroidaceae	Bacteroides	Bacteroides caccae
169018198021	-13528696613	23538465077	-0.5747484625	0.5654614266	0.8824041128	Bacteria	Proteobacteria	Deltaproteobacteria	Desulfovibrionales	Desulfovibrionaceae	Desulfovibrio	Desulfovibrio piger
62937923492	-0.6078957226	10584382805	-0.5743327067	0.5657426806	0.8824041128	Bacteria	Firmicutes	Clostridia	Clostridiales	Clostridiales Family XIII. Incertae Sedis	Mogibacterium	Mogibacterium neglectum
0.512742356	-11181745149	19525682937	-0.5726685814	0.5668691144		Bacteria	Firmicutes	Bacilli	Lactobacillales	Streptococcaceae	Streptococcus	Streptococcus uberis
0.1627825084	-16687118854	29777448067	-0.5603945246	0.5752103655		Bacteria	Bacteroidetes	Bacteroidia	Bacteroidales	Prevotellaceae	Prevotella	Prevotella oryzae
2586720910852	-0.2375730809	0.4272573687	-0.5560420916	0.5781820806	0.8987388124	Bacteria	Firmicutes	Clostridia	Clostridiales	Lachnospiraceae	Coprococcus	Coprococcus comes
10048697329	-0.8666017225	15948138207	-0.5433873919	0.5868631048	0.9009397701	Bacteria	Firmicutes	Tissierellia	Tissierellales	Peptoniphilaceae	Peptoniphilus	Peptoniphilus harei
49298652314	0.5307220357	0.9768772748	0.543284248	0.586934108	0.9009397701	Bacteria	Bacteroidetes	Bacteroidia	Bacteroidales	Barnesiellaceae	Coprobacter	Coprobacter secundus
0.5113293963	0.5327405962	0.9839925775	0.5414071288	0.5882269946		Bacteria	Firmicutes	Clostridia	Clostridiales	Hungateiclostridiaceae	Hungateiclostridium	Hungateiclostridium cellulolyticum
0.6066219727	-11793264481	21794032636	-0.5411235579	0.5884224216		Bacteria	Bacteroidetes	Bacteroidia	Bacteroidales	Prevotellaceae	Prevotella	Prevotella buccalis
99621185865	-0.2909575141	0.538175402	-0.5406369614	0.5887578365	0.9009397701	Bacteria	Firmicutes	Clostridia	Clostridiales	Lachnospiraceae	Anaerobium	Anaerobium acetethylicum
30738416188	0.8727965403	16177594089	0.5395094818	0.5895353563	0.9009397701	Bacteria	Tenericutes	Mollicutes	Entomoplasmatales	Spiroplasmataceae	Spiroplasma	Spiroplasma alleghenense
106755727756	-0.496972212	0.9225869116	-0.538672515	0.5901128418	0.9009397701	Bacteria	Proteobacteria	Gammaproteobacteria	Pasteurellales	Pasteurellaceae	Haemophilus	Haemophilus parainfluenzae
1597635738107	0.2741999267	0.5108332479	0.5367699301	0.5914265449	0.9009397701	Bacteria	Firmicutes	Clostridia	Clostridiales	Ruminococcaceae	Gemmiger	Gemmiger formicilis
0.2375981036	-0.4734176445	0.8933158721	-0.529955483	0.5961427963		Bacteria	Actinobacteria	Actinobacteria	Micrococcales	Bogoriellaceae	Georgenia	Georgenia halophila
1211395759454	-10315089664	19581371027	-0.5267807678	0.5983458399	0.9084519895	Bacteria	Bacteroidetes	Bacteroidia	Bacteroidales	Porphyromonadaceae	Porphyromonas	Porphyromonas pogonae
0.4397820241	-0.6081030017	11557050593	-0.5261749067	0.5987666872		Bacteria	Firmicutes	Clostridia	Clostridiales	Hungateiclostridiaceae	Thermoclostridium	Thermoclostridium stercorarium
0.3157509731	10600254307	20161037478	0.5257792075	0.5990416228		Bacteria	Firmicutes	Bacilli	Lactobacillales	Leuconostocaceae	Leuconostoc	Leuconostoc lactis
0.2177966099	-10033760559	19161790933	-0.5236337561	0.6005332984		Bacteria	Bacteroidetes	Bacteroidia	Bacteroidales	Prevotellaceae	Prevotella	Prevotella dentalis
15935735398	-0.5558093473	10623347108	-0.5231960715	0.600837815	0.9092148392	Bacteria	Firmicutes	Bacilli	Lactobacillales	Leuconostocaceae	Leuconostoc	Leuconostoc carnosum
12767695051	0.5014344026	0.9768746256	0.5133047675	0.6077381496	0.9164142716	Bacteria	Firmicutes	Bacilli	Lactobacillales	Streptococcaceae	Streptococcus	Streptococcus hongkongensis
712877069535	0.538679322	1054918507	0.5106359576	0.6096059925	0.9164142716	Archaea	Euryarchaeota	Methanobacteria	Methanobacteriales	Methanobacteriaceae	Methanobrevibacter	Methanobrevibacter smithii
0.1440526747	-15171472368	29793775125	-0.5092161804	0.6106007028		Bacteria	Proteobacteria	Gammaproteobacteria	Enterobacterales	Erwiniaceae	Erwinia	Erwinia tasmaniensis
0.363356309	0.9518319777	18819555338	0.5057675172	0.6130198643		Bacteria	Proteobacteria	Alphaproteobacteria	Kiloniellales	Kiloniellaceae	Kiloniella	Kiloniella majae
0.8184777079	0.4323987092	0.8630909731	0.5009885662	0.6163791698	0.918854132	Bacteria	Firmicutes	Bacilli	Bacillales	Thermoactinomycetaceae	Novibacillus	Novibacillus thermophilus
259662681865	0.3340524196	0.6669765833	0.5008457988	0.6164796506	0.918854132	Bacteria	Bacteroidetes	Bacteroidia	Bacteroidales	Odoribacteraceae	Butyricimonas	Butyricimonas paravirosa
27360523011	0.4963317521	10014409495	0.4956175921	0.6201642385	0.918854132	Bacteria	Firmicutes	Clostridia	Clostridiales	Clostridiaceae	Caloramator	Caloramator mitchellensis
187521182049	0.3205093644	0.6507226648	0.4925437237	0.6223350202	0.918854132	Bacteria	Firmicutes	Clostridia	Clostridiales	Lachnospiraceae	Lachnoclostridium	glycyrrhizinilyticum
0.310734267	0.9660718141	19638411647	0.4919297097	0.6227690347		Bacteria	Actinobacteria	Actinobacteria	Bifidobacteriales	Bifidobacteriaceae	Bifidobacterium	Bifidobacterium stellenboschense
0.1730715959	0.6483242455	1326783615	0.4886435423	0.6250940807		Bacteria	Bacteroidetes	Bacteroidia	Bacteroidales	Bacteroidaceae	Bacteroides	Bacteroides caecigallinarum
0.7832726372	0.4408011836	0.9071528958	0.4859171873	0.6270258819	0.918854132	Bacteria	Firmicutes	Negativicutes	Veillonellales	Veillonellaceae	Veillonella	Veillonella parvula
13332416073	-0.8251685712	16985512617	-0.4858072817	0.6271038111	0.918854132	Bacteria	Bacteroidetes	Bacteroidia	Bacteroidales	Porphyromonadaceae	Porphyromonas	Porphyromonas loveana
3924483410395	0.3338151303	0.6879782261	0.4852117664	0.6275261364	0.918854132	Bacteria	Firmicutes	Erysipelotrichia	Erysipelotrichales	Erysipelotrichaceae	Erysipelatoclostridium	spiroforme
10769540569	-0.5354353014	11071060217	-0.4836350728	0.6286448792	0.918854132	Bacteria	Actinobacteria	Coriobacteriia	Coriobacteriales	Coriobacteriaceae	Collinsella	Collinsella intestinalis
183968466517	-0.7922137957	16412894206	-0.4826776958	0.6293246025	0.918854132	Bacteria	Proteobacteria	Betaproteobacteria	Burkholderiales	Sutterellaceae	Sutterella	Sutterella massiliensis
0.5310593071	-0.4419182594	0.9168234625	-0.4820101988	0.6297987012		Bacteria	Firmicutes	Clostridia	Clostridiales	Lachnospiraceae	Anaerocolumna	Anaerocolumna aminovalerica
0.7461389523	0.6409157754	13404463335	0.478136095	0.6325533431	0.9201915882	Bacteria	Actinobacteria	Coriobacteriia	Coriobacteriales	Atopobiaceae	Olsenella	Olsenella profusa
0.2803427046	-0.503006575	10610168881	-0.4740797066	0.6354430693		Bacteria	Firmicutes	Clostridia	Clostridiales	Peptostreptococcaceae	Paeniclostridium	tenue
6067506848666	-0.1888917146	0.4007974807	-0.4712896755	0.6374338876	0.9201915882	Bacteria	Firmicutes	Clostridia	Clostridiales	Lachnospiraceae	Dorea	Dorea longicatena
0.1714419599	-12448619831	26751847818	-0.4653368214	0.64169027		Bacteria	Proteobacteria	Gammaproteobacteria	Enterobacterales	Erwiniaceae	Pantoea	plantarum
0.1783438138	-1240817482	26683307981	-0.4650163626	0.641919739		Bacteria	Bacteroidetes	Bacteroidia	Bacteroidales	Prevotellaceae	Prevotella	Prevotella oulorum
6205233867615	0.6567100335	14149864806	0.464110465	0.6425686044	0.9201915882	Bacteria	Firmicutes	Erysipelotrichia	Erysipelotrichales	Erysipelotrichaceae	Holdemanella	Holdemanella biformis
0.2394428378	-0.6963251383	15017338529	-0.4636807894	0.6428764627		Bacteria	Firmicutes	Clostridia	Clostridiales	Clostridiaceae	Clostridium	Clostridium amylolyticum
116615983228	0.2626748129	0.5669396669	0.4633205758	0.6431345994	0.9201915882	Bacteria	Firmicutes	Clostridia	Clostridiales	Ruminococcaceae	Anaerotruncus	Anaerotruncus rubiinfantis
0.3309973619	13722580142	29788079379	0.4606735455	0.6450328375		Bacteria	Proteobacteria	Deltaproteobacteria	Desulfovibrionales	Desulfovibrionaceae	Mailhella	Mailhella massiliensis
175615762961	-0.2860584471	0.6212292947	-0.4604715996	0.6451777522	0.9201915882	Bacteria	Actinobacteria	Actinobacteria	Bifidobacteriales	Bifidobacteriaceae	Bifidobacterium	Bifidobacterium longum;Bifidobacterium longum subsp. suillum
217948246606	-0.4282700628	0.9317368702	-0.459647006	0.6457696133	0.9201915882	Bacteria	Lentisphaerae	Lentisphaeria	Victivallales	Victivallaceae	Victivallis	Victivallis vadensis
211415352306	-0.3500433422	0.7622577701	-0.4592191198	0.6460768218	0.9201915882	Bacteria	Firmicutes	Clostridia	Clostridiales	Ruminococcaceae	Ruminococcus	Ruminococcus albus
115186107334	0.4496152459	0.982308187	0.457713019	0.6471586334	0.9201915882	Bacteria	Bacteroidetes	Bacteroidia	Bacteroidales	Tannerellaceae	Parabacteroides	Parabacteroides goldsteinii
0.3389646327	0.9417059992	20867746825	0.4512734447	0.6517924816		Bacteria	Proteobacteria	Alphaproteobacteria	Rhodospirillales	Rhodospirillaceae	Novispirillum	Novispirillum itersonii;Novispirillum itersonii subsp. nipponicum
875507670223	0.2819014513	0.6253589557	0.450783424	0.6521456492	0.9201915882	Bacteria	Bacteroidetes	Bacteroidia	Bacteroidales	Rikenellaceae	Alistipes	Alistipes shahii
1058641625097	-0.2073464537	0.4607978588	-0.4499726935	0.6527301302	0.9201915882	Bacteria	Bacteroidetes	Bacteroidia	Bacteroidales	Bacteroidaceae	Bacteroides	Bacteroides faecis
21713970911	-0.3683693297	0.8194709288	-0.4495209248	0.6530559169	0.9201915882	Bacteria	Bacteroidetes	Bacteroidia	Bacteroidales	Bacteroidaceae	Bacteroides	Bacteroides nordii
5434583045695	0.3069184515	0.6884686599	0.4457987261	0.6557426421	0.9201915882	Bacteria	Bacteroidetes	Bacteroidia	Bacteroidales	Rikenellaceae	Alistipes	Alistipes putredinis
0.2606125161	-10256450691	23057602684	-0.4448186063	0.656450847		Bacteria	Proteobacteria	Gammaproteobacteria	Pseudomonadales	Pseudomonadaceae	Pseudomonas	Pseudomonas aeruginosa
64467056619	0.35232274	0.7945509777	0.4434237071	0.6574592914	0.9201915882	Bacteria	Firmicutes	Clostridia	Clostridiales	Lachnospiraceae	Lachnoclostridium	asparagiforme
50878298824	0.2433833777	0.5521591385	0.4407848404	0.6593687693	0.9201915882	Bacteria	Firmicutes	Clostridia	Clostridiales	Ruminococcaceae	Anaerofilum	Anaerofilum pentosovorans
326627447263	-0.2468253216	0.5689872527	-0.4337976298	0.6644354029	0.9201915882	Bacteria	Firmicutes	Bacilli	Lactobacillales	Streptococcaceae	Streptococcus	Streptococcus oralis;Streptococcus oralis subsp. dentisani
43440831216	0.4214981338	0.9719001837	0.4336845912	0.6645174976	0.9201915882	Bacteria	Firmicutes	Negativicutes	Veillonellales	Veillonellaceae	Veillonella	Veillonella rogosae
0.1728841477	-11672852495	26969604042	-0.4328151232	0.6651490857		Bacteria	Proteobacteria	Gammaproteobacteria	Enterobacterales	Enterobacteriaceae	Raoultella	Raoultella terrigena
1238730767643	0.5037157899	11689822734	0.4309011362	0.6665402572	0.9201915882	Bacteria	Actinobacteria	Actinobacteria	Bifidobacteriales	Bifidobacteriaceae	Bifidobacterium	Bifidobacterium bifidum
0.1541885619	-0.9977934392	23156529898	-0.4308907438	0.6665478141		Bacteria	Bacteroidetes	Bacteroidia	Bacteroidales	Prevotellaceae	Prevotella	Prevotella saccharolytica
16327555452	-0.3049182968	0.7125696478	-0.4279136752	0.6687139705	0.9201915882	Bacteria	Bacteroidetes	Bacteroidia	Bacteroidales	Bacteroidaceae	Bacteroides	Bacteroides acidifaciens
0.499015886	0.4724200558	11048210505	0.4275987098	0.6689433054		Bacteria	Actinobacteria	Actinobacteria	Actinomycetales	Actinomycetaceae	Actinomyces	Actinomyces bowdenii
955565033922	-0.1953691565	0.4606353335	-0.4241297667	0.6714711779	0.9201915882	Bacteria	Bacteroidetes	Bacteroidia	Bacteroidales	Bacteroidaceae	Bacteroides	Bacteroides xylanisolvens
30009423785	0.4224759334	0.9968130235	0.423826659	0.6716922343	0.9201915882	Bacteria	Bacteroidetes	Bacteroidia	Bacteroidales	Tannerellaceae	Parabacteroides	Parabacteroides gordonii
2051204825581	-0.5772057547	13655697119	-0.4226849422	0.6725251432	0.9201915882	Bacteria	Firmicutes	Negativicutes	Acidaminococcales	Acidaminococcaceae	Phascolarctobacterium	Phascolarctobacterium succinatutens
0.3576880146	0.3768683336	0.8979477603	0.4196996198	0.6747049029		Bacteria	Firmicutes	Clostridia	Clostridiales	Caldicoprobacteraceae	Caldicoprobacter	Caldicoprobacter algeriensis
0.4445642037	-0.9204140365	22071457149	-0.4170155284	0.6766670496		Bacteria	Actinobacteria	Actinobacteria	Actinomycetales	Actinomycetaceae	Schaalia	Schaalia turicensis
0.2292559228	-10775622551	25935631794	-0.4154756143	0.6777937632		Bacteria	Proteobacteria	Gammaproteobacteria	Enterobacterales	Enterobacteriaceae	Citrobacter	Citrobacter braakii
0.2726296682	-0.9421637567	23250111623	-0.4052297778	0.6853086185		Bacteria	Actinobacteria	Actinobacteria	Bifidobacteriales	Bifidobacteriaceae	Parascardovia	Parascardovia denticolens
17389868085	0.2114680303	0.5318673722	0.3975954182	0.6909284384	0.9321315773	Bacteria	Firmicutes	Clostridia	Clostridiales	Eubacteriaceae	Eubacterium	Eubacterium oxidoreducens
0.7391692983	0.5374031093	13524531059	0.3973543386	0.6911061822	0.9321315773	Bacteria	Firmicutes	Bacilli	Lactobacillales	Enterococcaceae	Enterococcus	Enterococcus gallinarum
0.2630007224	10363504118	26159944288	0.396159258	0.6919875451		Bacteria	Actinobacteria	Actinobacteria	Actinomycetales	Actinomycetaceae	Actinomyces	Actinomyces naeslundii
3171541835	0.399666837	10127700031	0.3946274433	0.6931178572	0.9321315773	Bacteria	Actinobacteria	Actinobacteria	Bifidobacteriales	Bifidobacteriaceae	Bifidobacterium	Bifidobacterium pullorum
16143951203	0.3082323457	0.7853131599	0.3924960913	0.6946916988	0.9321315773	Bacteria	Actinobacteria	Actinobacteria	Bifidobacteriales	Bifidobacteriaceae	Bifidobacterium	Bifidobacterium tissieri
0.5698192221	-0.6158603462	1573778154	-0.3913260231	0.6955562658		Bacteria	Firmicutes	Tissierellia	Tissierellales	Peptoniphilaceae	Peptoniphilus	Peptoniphilus coxii
17118666966	-0.3102386439	0.7960265688	-0.3897340316	0.6967332289	0.9321315773	Bacteria	Actinobacteria	Coriobacteriia	Eggerthellales	Eggerthellaceae	Raoultibacter	Raoultibacter massiliensis
85918082711	0.3078960626	0.7920148791	0.3887503515	0.6974608312	0.9321315773	Bacteria	Firmicutes	Clostridia	Clostridiales	Clostridiaceae	Butyricicoccus	Butyricicoccus pullicaecorum
0.0948379014	0.673717637	17556961329	0.3837324833	0.7011767342		Bacteria	Bacteroidetes	Bacteroidia	Bacteroidales	Barnesiellaceae	Barnesiella	Barnesiella viscericola
11452135686	-0.4688057029	12217249882	-0.3837244121	0.701182717	0.9321315773	Bacteria	Firmicutes	Clostridia	Clostridiales	Clostridiaceae	Clostridium	Clostridium chauvoei
0.7447474304	0.3082686894	0.8040521016	0.3833939228	0.7014277086	0.9321315773	Bacteria	Firmicutes	Clostridia	Clostridiales	Ruminococcaceae	Caproiciproducens	Caproiciproducens galactitolivorans
112891839248	0.247485487	0.6455395069	0.3833777551	0.7014396946	0.9321315773	Bacteria	Firmicutes	Erysipelotrichia	Erysipelotrichales	Erysipelotrichaceae	Erysipelatoclostridium	innocuum
158236136351	-0.1817145668	0.4743311586	-0.3830964159	0.701648277	0.9321315773	Bacteria	Firmicutes	Clostridia	Clostridiales	Clostridiales Family XIII. Incertae Sedis	Aminipila	Aminipila butyrica
0.4850136986	0.8665274183	22662469674	0.3823623068	0.7021926449		Bacteria	Firmicutes	Bacilli	Lactobacillales	Enterococcaceae	Enterococcus	Enterococcus pseudoavium
0.1340729829	-11278379739	29825269738	-0.3781484573	0.7053203125		Bacteria	Firmicutes	Bacilli	Lactobacillales	Lactobacillaceae	Lactobacillus	Lactobacillus acidophilus
649910124609	0.3287068221	0.8741362838	0.3760361264	0.7068900387	0.9339418821	Bacteria	Actinobacteria	Coriobacteriia	Eggerthellales	Eggerthellaceae	Raoultibacter	Raoultibacter timonensis
1607856783323	0.2167254017	0.5767714856	0.3757560959	0.7070982302	0.9339418821	Bacteria	Firmicutes	Clostridia	Clostridiales	Ruminococcaceae	Sporobacter	Sporobacter termitidis
0.1563232366	-0.4050373445	10821230131	-0.3742987993	0.7081820253		Bacteria	Actinobacteria	Acidimicrobiia	Acidimicrobiales	Acidimicrobiaceae	Aciditerrimonas	Aciditerrimonas ferrireducens
0.1868702222	-0.6945142609	19052593426	-0.3645247896	0.7154661659		Bacteria	Proteobacteria	Gammaproteobacteria	Enterobacterales	Enterobacteriaceae	Klebsiella	Klebsiella pneumoniae
107543228291	-0.8228987163	22792956516	-0.3610320214	0.7180755096	0.9367572289	Bacteria	Candidatus Melainabacteria	Unclassified	Unclassified	Unclassified	Unclassified	Unclassified
0.2857633427	-0.8515806023	23607120542	-0.3607303994	0.7183009972		Bacteria	Actinobacteria	Coriobacteriia	Eggerthellales	Eggerthellaceae	Slackia	Slackia equolifaciens
450088304474	-0.4064957284	11284630725	-0.3602206739	0.7186821155	0.9367572289	Bacteria	Firmicutes	Negativicutes	Veillonellales	Veillonellaceae	Dialister	Dialister invisus
0.927686472	-0.3450798509	0.9585391922	-0.36000599	0.7188426541	0.9367572289	Bacteria	Proteobacteria	Gammaproteobacteria	Aeromonadales	Succinivibrionaceae	Succinivibrio	Succinivibrio dextrinosolvens
0.2017424146	-0.7326614034	20377322906	-0.3595474277	0.7191856043		Bacteria	Bacteroidetes	Bacteroidia	Bacteroidales	Bacteroidaceae	Bacteroides	Bacteroides salanitronis
0.1856438395	0.6128133137	17089313761	0.358594454	0.7198984963		Bacteria	Firmicutes	Clostridia	Clostridiales	Hungateiclostridiaceae	Ruminiclostridium	Ruminiclostridium sufflavum
0.1962895616	-0.9435094952	26312749681	-0.3585750279	0.7199130309		Bacteria	Proteobacteria	Epsilonproteobacteria	Campylobacterales	Campylobacteraceae	Campylobacter	Campylobacter hominis
27849817972	0.2244525833	0.630341748	0.3560807832	0.7217800681	0.9367572289	Bacteria	Firmicutes	Clostridia	Clostridiales	Lachnospiraceae	Faecalicatena	Faecalicatena contorta
832827672509	0.2258850364	0.6364963349	0.3548881965	0.7226733515	0.9367572289	Bacteria	Firmicutes	Clostridia	Clostridiales	Ruminococcaceae	Neglecta	Neglecta timonensis
0.2207485875	0.8055223874	22738526038	0.3542544429	0.723148206		Bacteria	Proteobacteria	Alphaproteobacteria	Rhodospirillales	Acetobacteraceae	Acetobacter	Acetobacter malorum
893067796882	-0.216799492	0.6123549761	-0.3540421821	0.7233072711	0.9367572289	Bacteria	Firmicutes	Clostridia	Clostridiales	Eubacteriaceae	Eubacterium	Eubacterium ramulus
0.1227601829	-10551035828	29824110223	-0.3537753767	0.7235072282		Bacteria	Actinobacteria	Coriobacteriia	Coriobacteriales	Coriobacteriaceae	Enorma	Enorma phocaeensis
0.2026021706	0.4290291247	12142928026	0.3533160402	0.7238515216		Bacteria	Firmicutes	Clostridia	Clostridiales	Clostridiaceae	Clostridium	Clostridium putrefaciens
3920215604594	0.3267546412	0.9324666671	0.350419648	0.7260237831	0.9367572289	Bacteria	Bacteroidetes	Bacteroidia	Bacteroidales	Prevotellaceae	Paraprevotella	Paraprevotella clara
0.7933384756	0.6448871054	18443168056	0.3496617845	0.7265925369	0.9367572289	Bacteria	Proteobacteria	Gammaproteobacteria	Enterobacterales	Budviciaceae	Leminorella	Leminorella grimontii
1242265787164	-0.1782541035	0.5119066263	-0.3482160502	0.7276779349	0.9367572289	Bacteria	Bacteroidetes	Bacteroidia	Bacteroidales	Odoribacteraceae	Odoribacter	Odoribacter splanchnicus
0.2747176324	0.7945943478	23006919245	0.3453719028	0.7298147974		Bacteria	Actinobacteria	Actinobacteria	Bifidobacteriales	Bifidobacteriaceae	Bifidobacterium	Bifidobacterium animalis
0.2874629578	0.3444222716	10092358235	0.3412703588	0.7329000601		Bacteria	Bacteroidetes	Bacteroidia	Bacteroidales	Bacteroidaceae	Bacteroides	Bacteroides graminisolvens
0.1995726479	0.3885138575	11453095068	0.3392217171	0.7344427103		Bacteria	Proteobacteria	Deltaproteobacteria	Desulfovibrionales	Desulfovibrionaceae	Desulfovibrio	Desulfovibrio termitidis
0.1609593797	0.7683029008	2285860965	0.3361109501	0.7367872013		Bacteria	Firmicutes	Clostridia	Clostridiales	Clostridiaceae	Oceanirhabdus	Oceanirhabdus sediminicola
0.5140326869	0.3147391586	0.9475831789	0.3321493728	0.7397764702		Bacteria	Firmicutes	Clostridia	Clostridiales	Clostridiaceae	Caloramator	Caloramator fervidus
12051151109	0.2114630157	0.6394050812	0.3307183849	0.7408572139	0.9510442325	Bacteria	Firmicutes	Clostridia	Clostridiales	Lachnospiraceae	Lachnospira	Lachnospira multipara
0.2112810924	0.653113204	19884465565	0.3284539893	0.7425684275		Bacteria	Proteobacteria	Alphaproteobacteria	Rhodospirillales	Rhodospirillaceae	Marispirillum	Marispirillum indicum
1789683126	0.5916178304	18194296276	0.3251666464	0.7450549505	0.9512971616	Bacteria	Proteobacteria	Gammaproteobacteria	Enterobacterales	Enterobacteriaceae	Citrobacter	Citrobacter freundii
0.1680338522	-0.96461181	29831854821	-0.3233495925	0.7464305		Bacteria	Firmicutes	Erysipelotrichia	Erysipelotrichales	Erysipelotrichaceae	Catenisphaera	Catenisphaera adipataccumulans
137277965154	-0.1418078662	0.4434594259	-0.3197764167	0.7491378264	0.9512971616	Bacteria	Firmicutes	Clostridia	Clostridiales	Clostridiaceae	Lutispora	Lutispora thermophila
232207569953	0.128806524	0.4041586756	0.3187028555	0.7499518491	0.9512971616	Bacteria	Firmicutes	Clostridia	Clostridiales	Lachnospiraceae	Blautia	Blautia schinkii
1700190245038	0.147817927	0.4639320575	0.3186197734	0.7500148573	0.9512971616	Bacteria	Firmicutes	Clostridia	Clostridiales	Lachnospiraceae	Dorea	Dorea formicigenerans
1559105542562	0.1220487764	0.3877662216	0.3147483448	0.7529527345	0.9512971616	Bacteria	Bacteroidetes	Bacteroidia	Bacteroidales	Bacteroidaceae	Bacteroides	Bacteroides thetaiotaomicron
165895496613	0.136908421	0.4360559207	0.3139698706	0.7535439223	0.9512971616	Bacteria	Firmicutes	Clostridia	Clostridiales	Lachnospiraceae	Murimonas	Murimonas intestini
0.1196103806	0.9232502903	2982032768	0.3096043411	0.7568618547		Bacteria	Firmicutes	Bacilli	Lactobacillales	Lactobacillaceae	Lactobacillus	Lactobacillus nagelii
0.2882494946	-0.3120593155	10234164182	-0.3049191999	0.7604276922		Bacteria	Firmicutes	Clostridia	Clostridiales	Eubacteriaceae	Alkalibaculum	Alkalibaculum bacchi
3161980475051	0.1814474532	0.5968996938	0.3039831568	0.7611407232	0.9530992126	Bacteria	Firmicutes	Clostridia	Clostridiales	Eubacteriaceae	Eubacterium	eligens
0.1319991046	0.5954379975	19698252763	0.3022796005	0.7624389279		Bacteria	Actinobacteria	Actinobacteria	Bifidobacteriales	Bifidobacteriaceae	Bifidobacterium	Bifidobacterium asteroides
42780168088	0.201846546	0.6680522771	0.3021418427	0.7625439362	0.9530992126	Bacteria	Firmicutes	Clostridia	Clostridiales	Lachnospiraceae	Caecibacterium	Caecibacterium sporoformans
62880592439	-0.1243972618	0.4130970009	-0.3011332969	0.7633128515	0.9530992126	Bacteria	Firmicutes	Clostridia	Clostridiales	Lachnospiraceae	Mobilitalea	Mobilitalea sibirica
100867930224	0.2619037624	0.8738040679	0.299728248	0.7643844499	0.9530992126	Bacteria	Firmicutes	Erysipelotrichia	Erysipelotrichales	Erysipelotrichaceae	Turicibacter	Turicibacter sanguinis
0.1422777061	0.5211388553	17630402932	0.2955910068	0.7675424424		Bacteria	Firmicutes	Clostridia	Clostridiales	Lachnospiraceae	Lachnoanaerobaculum	Lachnoanaerobaculum saburreum
66524626144	-0.1814930296	0.6225697781	-0.2915223899	0.7706518224	0.9530992126	Bacteria	Bacteroidetes	Bacteroidia	Bacteroidales	Bacteroidaceae	Bacteroides	Bacteroides timonensis
64227431181	0.1962996715	0.6746920014	0.2909470856	0.7710917891	0.9530992126	Bacteria	Actinobacteria	Actinobacteria	Micrococcales	Micrococcaceae	Rothia	Rothia mucilaginosa
0.9714888611	-0.4293727285	14998882072	-0.2862698209	0.7746714707	0.9530992126	Bacteria	Proteobacteria	Gammaproteobacteria	Enterobacterales	Enterobacteriaceae	Klebsiella	Klebsiella quasipneumoniae;Klebsiella quasipneumoniae subsp. quasipneumoniae
116374212709	0.1661570683	0.5835121792	0.2847533851	0.7758330875	0.9530992126	Bacteria	Bacteroidetes	Bacteroidia	Bacteroidales	Rikenellaceae	Alistipes	Alistipes ihumii
381399395421	-0.1742532921	0.6125141922	-0.2844885789	0.7760359854	0.9530992126	Bacteria	Bacteroidetes	Bacteroidia	Bacteroidales	Rikenellaceae	Alistipes	Alistipes finegoldii
0.3006493051	0.3558645232	12643205144	0.2814670166	0.7783522228		Bacteria	Actinobacteria	Actinobacteria	Actinomycetales	Actinomycetaceae	Actinobaculum	Actinobaculum massiliense
0.7923584937	-0.4344559112	15470190359	-0.2808342374	0.7788375422	0.9530992126	Bacteria	Actinobacteria	Actinobacteria	Bifidobacteriales	Bifidobacteriaceae	Alloscardovia	Alloscardovia omnicolens
0.2453103944	-0.6463965473	23200437528	-0.2786139471	0.7805411082		Bacteria	Synergistetes	Synergistia	Synergistales	Synergistaceae	Cloacibacillus	Cloacibacillus evryensis
10237607693	0.1905609818	0.6847047409	0.2783111762	0.7807734975	0.9530992126	Bacteria	Firmicutes	Clostridia	Clostridiales	Lachnospiraceae	Lachnoclostridium	celerecrescens
11615823108	-0.3794994063	13656699266	-0.2778851602	0.7811005159	0.9530992126	Bacteria	Firmicutes	Clostridia	Clostridiales	Clostridiaceae	Clostridium	Clostridium chartatabidum
40223284199	0.3415189817	12346821693	0.2766047735	0.782083599	0.9530992126	Bacteria	Firmicutes	Clostridia	Clostridiales	Clostridiaceae	Clostridium	Clostridium perfringens
0.2387503436	0.4775002907	17332101617	0.2755005141	0.7829317309		Bacteria	Firmicutes	Clostridia	Clostridiales	Lachnospiraceae	Hespellia	Hespellia stercorisuis
0.1714051745	-0.5157743166	18802545783	-0.2743108952	0.7838457124		Bacteria	Firmicutes	Bacilli	Lactobacillales	Lactobacillaceae	Lactobacillus	Lactobacillus panis
21041081551	0.1937397827	0.7113473724	0.2723560813	0.7853482387	0.9545323008	Bacteria	Firmicutes	Clostridia	Clostridiales	Catabacteriaceae	Catabacter	Catabacter hongkongensis
0.1045059627	-0.6316891371	23238993352	-0.2718229346	0.7857581697		Bacteria	Firmicutes	Clostridia	Clostridiales	Peptococcaceae	Desulfosporosinus	Desulfosporosinus orientis
0.0955038284	-0.8096361416	29833961835	-0.271380699	0.7860982452		Bacteria	Bacteroidetes	Bacteroidia	Bacteroidales	Prevotellaceae	Prevotella	Prevotella amnii
0.2303083812	0.3422080624	12615181042	0.2712668659	0.7861857885		Bacteria	Firmicutes	Clostridia	Clostridiales	Clostridiaceae	Crassaminicella	Crassaminicella profunda
0.2249689661	0.7104975011	26297397379	0.2701778776	0.7870234111		Bacteria	Firmicutes	Bacilli	Lactobacillales	Streptococcaceae	Streptococcus	Streptococcus minor
0.8901690922	-0.620472402	23028624423	-0.2694352865	0.7875947351	0.9547235913	Bacteria	Bacteroidetes	Bacteroidia	Bacteroidales	Tannerellaceae	Parabacteroides	Parabacteroides faecis
0.5479323822	0.7517971915	28276898364	0.2658697506	0.7903395224		Bacteria	Synergistetes	Synergistia	Synergistales	Synergistaceae	Pyramidobacter	Pyramidobacter piscolens
0.1875623728	0.3995253444	150424249	0.2655990288	0.7905480336		Bacteria	Firmicutes	Bacilli	Lactobacillales	Aerococcaceae	Abiotrophia	Abiotrophia defectiva
0.2820349912	0.5278494286	19958895348	0.2644682581	0.7914191207		Bacteria	Firmicutes	Bacilli	Lactobacillales	Enterococcaceae	Tetragenococcus	Tetragenococcus halophilus
27729777268	-0.4551149569	17309071895	-0.2629343501	0.79260118	0.9565479082	Bacteria	Bacteroidetes	Flavobacteriia	Flavobacteriales	Flavobacteriaceae	Coenonia	Coenonia anatina
0.0805125896	-0.7192699255	28088244696	-0.256075071	0.7978928708		Bacteria	Firmicutes	Bacilli	Lactobacillales	Streptococcaceae	Lactococcus	Lactococcus piscium
0.9116463235	0.4795787852	18839541853	0.2545596857	0.7990631997	0.9565479082	Bacteria	Proteobacteria	Alphaproteobacteria	Rhodospirillales	Acetobacteraceae	Gluconacetobacter	Gluconacetobacter tumulisoli
0.6380278574	0.463746693	1827912628	0.2537028772	0.7997251111		Bacteria	Firmicutes	Clostridia	Clostridiales	Lachnospiraceae	Acetitomaculum	Acetitomaculum ruminis
34202966222	-0.2310583438	0.920176624	-0.2511021665	0.8017351209	0.9565479082	Bacteria	Bacteroidetes	Bacteroidia	Bacteroidales	Prevotellaceae	Prevotella	Prevotella stercorea
0.2893953505	-0.5724568514	23410482166	-0.2445301414	0.8068202609		Bacteria	Firmicutes	Bacilli	Lactobacillales	Lactobacillaceae	Lactobacillus	Lactobacillus alimentarius
59446578913	0.1365458146	0.5609061989	0.2434378775	0.8076662042	0.9565479082	Bacteria	Firmicutes	Clostridia	Clostridiales	Clostridiaceae	Hungatella	Hungatella effluvii
67565406026	0.2355995489	0.9756015964	0.2414915573	0.8091741592	0.9565479082	Bacteria	Firmicutes	Clostridia	Clostridiales	Eubacteriaceae	Rhabdanaerobium	Rhabdanaerobium thermarum
57259904114	-0.1404545997	0.5840578819	-0.2404806169	0.8099576879	0.9565479082	Bacteria	Bacteroidetes	Bacteroidia	Bacteroidales	Bacteroidaceae	Bacteroides	Bacteroides intestinalis
24681100572	0.1886254982	0.7997482607	0.2358560906	0.8135443417	0.9565479082	Bacteria	Actinobacteria	Actinobacteria	Bifidobacteriales	Bifidobacteriaceae	Bifidobacterium	Bifidobacterium pseudolongum
1753061787349	-0.0865947024	0.368003387	-0.2353095255	0.8139685024	0.9565479082	Bacteria	Bacteroidetes	Bacteroidia	Bacteroidales	Bacteroidaceae	Bacteroides	Bacteroides dorei
1045580288327	-0.1735728622	0.7474914422	-0.2322071563	0.8163771197	0.9565479082	Bacteria	Bacteroidetes	Bacteroidia	Bacteroidales	Bacteroidaceae	Bacteroides	Bacteroides eggerthii
1564853904122	-0.1423001022	0.6177698303	-0.2303448554	0.817823808	0.9565479082	Bacteria	Bacteroidetes	Bacteroidia	Bacteroidales	Bacteroidaceae	Bacteroides	Bacteroides cellulosilyticus
2329875935565	0.2194202731	0.9557263638	0.2295848282	0.8184143973	0.9565479082	Bacteria	Proteobacteria	Betaproteobacteria	Burkholderiales	Sutterellaceae	Parasutterella	Parasutterella excrementihominis
70159365651	-0.1188266523	0.5189612793	-0.2289701699	0.8188921012	0.9565479082	Bacteria	Firmicutes	Clostridia	Clostridiales	Lachnospiraceae	Blautia	Blautia hydrogenotrophica
389281113119	0.2516379943	11066974849	0.2273773979	0.8201302939	0.9565479082	Bacteria	Firmicutes	Bacilli	Lactobacillales	Enterococcaceae	Enterococcus	Enterococcus hirae
0.0603580338	-0.6663783251	29840839705	-0.2233108491	0.8232935841		Bacteria	Firmicutes	Clostridia	Clostridiales	Clostridiaceae	Clostridium	Clostridium isatidis
4607085808861	0.1728970196	0.7784582943	0.2221018401	0.8242346055	0.9565479082	Bacteria	Bacteroidetes	Bacteroidia	Bacteroidales	Bacteroidaceae	Bacteroides	Bacteroides stercoris
0.3279361537	0.4301821693	1942561681	0.2214509704	0.8247413088		Bacteria	Proteobacteria	Gammaproteobacteria	Enterobacterales	Enterobacteriaceae	Kosakonia	Kosakonia radicincitans
0.1184102813	0.4326771588	19549723592	0.221321369	0.8248422125		Bacteria	Proteobacteria	Gammaproteobacteria	Chromatiales	Unclassified	Unclassified	Unclassified
0.9728691983	-0.3673527559	1672663644	-0.2196214147	0.826166012	0.9565479082	Bacteria	Proteobacteria	Gammaproteobacteria	Enterobacterales	Enterobacteriaceae	Klebsiella	Klebsiella oxytoca
0.8237128317	0.3893949315	17776839818	0.2190462059	0.8266140546	0.9565479082	Bacteria	Firmicutes	Bacilli	Lactobacillales	Enterococcaceae	Enterococcus	Enterococcus canis
0.4574697142	0.4137450165	19369369518	0.2136078906	0.8308528456		Bacteria	Firmicutes	Bacilli	Lactobacillales	Enterococcaceae	Enterococcus	Enterococcus casseliflavus
0.9572977216	-0.2664310864	12592357936	-0.2115815702	0.8324334887	0.9565479082	Bacteria	Firmicutes	Bacilli	Lactobacillales	Leuconostocaceae	Leuconostoc	Leuconostoc mesenteroides;Leuconostoc mesenteroides subsp. jonggajibkimchii
300922673734	0.0869344843	0.4130630978	0.2104629651	0.8333063539	0.9565479082	Bacteria	Firmicutes	Clostridia	Clostridiales	Lachnospiraceae	Faecalimonas	Faecalimonas umbilicata
12015001043	0.1493196096	0.7171528849	0.2082116836	0.8350636863	0.9565479082	Bacteria	Firmicutes	Clostridia	Clostridiales	Eubacteriaceae	Anaerofustis	Anaerofustis stercorihominis
3690289561015	0.2966749774	14255660473	0.2081102998	0.8351428452	0.9565479082	Bacteria	Firmicutes	Erysipelotrichia	Erysipelotrichales	Erysipelotrichaceae	Catenibacterium	Catenibacterium mitsuokai
14177897636	0.1539995636	0.7416817249	0.2076356454	0.8355134699	0.9565479082	Bacteria	Firmicutes	Tissierellia	Tissierellales	Peptoniphilaceae	Peptoniphilus	Peptoniphilus duerdenii
17355774682474	-0.0981525773	0.473674085	-0.2072154261	0.8358416205	0.9565479082	Bacteria	Actinobacteria	Coriobacteriia	Coriobacteriales	Coriobacteriaceae	Collinsella	Collinsella aerofaciens
0.5780497084	0.2500580689	12120340609	0.2063127407	0.836546627		Bacteria	Firmicutes	Clostridia	Clostridiales	Clostridiaceae	Tindallia	Tindallia californiensis
1011560790452	0.2433220729	11844884527	0.2054237611	0.8372410575	0.9565479082	Bacteria	Firmicutes	Bacilli	Lactobacillales	Lactobacillaceae	Lactobacillus	Lactobacillus reuteri
0.1152642447	0.4127709389	20133158421	0.2050204594	0.8375561402		Bacteria	Firmicutes	Clostridia	Clostridiales	Lachnospiraceae	Syntrophococcus	Syntrophococcus sucromutans
0.4520442446	-0.2549215919	12899734551	-0.1976177036	0.8433441825		Bacteria	Actinobacteria	Actinobacteria	Actinomycetales	Actinomycetaceae	Schaalia	Schaalia georgiae
518409957214	-0.1168572075	0.5982025625	-0.1953472198	0.845121133	0.9604441756	Bacteria	Bacteroidetes	Bacteroidia	Bacteroidales	Rikenellaceae	Alistipes	Alistipes obesi
0.1090050288	-0.5297091188	27433406145	-0.1930890812	0.8468892037		Bacteria	Firmicutes	Clostridia	Clostridiales	Lachnospiraceae	Stomatobaculum	Stomatobaculum longum
23463980023	-0.1039526914	0.5423498585	-0.1916709109	0.8479999932	0.9604441756	Bacteria	Actinobacteria	Coriobacteriia	Eggerthellales	Eggerthellaceae	Asaccharobacter	Asaccharobacter celatus
32642445364	0.2360926495	12440503734	0.1897774033	0.8494835636	0.9604441756	Bacteria	Proteobacteria	Gammaproteobacteria	Enterobacterales	Enterobacteriaceae	Klebsiella	Klebsiella aerogenes
3315402195729	0.1612243069	0.857960902	0.1879156806	0.8509427503	0.9604441756	Bacteria	Firmicutes	Clostridia	Clostridiales	Lachnospiraceae	Coprococcus	Coprococcus eutactus
111580066212	-0.1026525982	0.5470743917	-0.1876391945	0.8511594992	0.9604441756	Bacteria	Firmicutes	Clostridia	Clostridiales	Lachnospiraceae	Blautia	gnavus
0.1389887192	0.3141600556	16993787526	0.1848675906	0.8533328917		Bacteria	Proteobacteria	Gammaproteobacteria	Enterobacterales	Morganellaceae	Cosenzaea	Cosenzaea myxofaciens
0.5703996809	0.4119966339	22596441639	0.182328103	0.8553252453		Bacteria	Fusobacteria	Fusobacteriia	Fusobacteriales	Fusobacteriaceae	Fusobacterium	Fusobacterium mortiferum
0.8025979386	-0.2821961448	15676271704	-0.180014834	0.8571409226	0.9629269829	Bacteria	Proteobacteria	Gammaproteobacteria	Enterobacterales	Enterobacteriaceae	Klebsiella	Klebsiella grimontii
12536293361	0.3273456466	18240254254	0.1794633134	0.8575739213	0.9629269829	Bacteria	Bacteroidetes	Bacteroidia	Bacteroidales	Prevotellaceae	Prevotella	Prevotella corporis
0.1786597729	-0.3903034198	21829343857	-0.1787975957	0.8580966332		Bacteria	Firmicutes	Clostridia	Clostridiales	Hungateiclostridiaceae	Mageeibacillus	Mageeibacillus indolicus
0.1374362032	-0.2296124253	13319327029	-0.1723904104	0.8631306107		Bacteria	Firmicutes	Bacilli	Bacillales	Thermoactinomycetaceae	Salinithrix	Salinithrix halophila
0.2990970569	-0.1894937684	11071893111	-0.1711484807	0.8641070161		Bacteria	Firmicutes	Clostridia	Clostridiales	Peptostreptococcaceae	Unclassified	Unclassified
0.5153592974	0.4674446821	27542185752	0.16971953	0.8652307142		Bacteria	Firmicutes	Erysipelotrichia	Erysipelotrichales	Erysipelotrichaceae	Erysipelothrix	Erysipelothrix larvae
0.6645966519	0.1811689587	11025745931	0.1643144689	0.869483592		Bacteria	Firmicutes	Clostridia	Clostridiales	Peptostreptococcaceae	Paeniclostridium	Paeniclostridium sordellii
0.4003849933	-0.3483082321	2125517561	-0.1638698444	0.8698336068		Bacteria	Proteobacteria	Gammaproteobacteria	Enterobacterales	Enterobacteriaceae	Enterobacter	Enterobacter kobei
0.1310707374	-0.4830700574	29839691726	-0.1618884209	0.8713937213		Bacteria	Bacteroidetes	Bacteroidia	Bacteroidales	Porphyromonadaceae	Porphyromonas	Porphyromonas bennonis
1795282972342	0.1225958696	0.7650061781	0.1602547445	0.8726804067	0.9716026672	Bacteria	Firmicutes	Clostridia	Clostridiales	Peptostreptococcaceae	Romboutsia	Romboutsia timonensis
1406223905976	0.1275777154	0.831325492	0.1534630138	0.8780331555	0.9716026672	Bacteria	Firmicutes	Clostridia	Clostridiales	Clostridiaceae	Clostridium	Clostridium saudiense
65233779505	-0.0727256483	0.4768047529	-0.1525271044	0.8787712143	0.9716026672	Bacteria	Firmicutes	Clostridia	Clostridiales	Clostridiaceae	Hungatella	Hungatella hathewayi
0.3887878261	0.147023596	0.9771584356	0.1504603457	0.8804014341		Bacteria	Actinobacteria	Actinobacteria	Actinomycetales	Actinomycetaceae	Actinomyces	Actinomyces massiliensis
3621295262757	-0.0744290382	0.4995052569	-0.1490055152	0.881549281	0.9716026672	Bacteria	Firmicutes	Clostridia	Clostridiales	Lachnospiraceae	Fusicatenibacter	Fusicatenibacter saccharivorans
0.1598093831	-0.3902133507	26241153799	-0.1487028176	0.8817881378		Bacteria	Firmicutes	Clostridia	Clostridiales	Hungateiclostridiaceae	Ruminiclostridium	Ruminiclostridium josui
0.2120235937	0.4425889156	29834172012	0.148349656	0.882066829		Bacteria	Firmicutes	Erysipelotrichia	Erysipelotrichales	Erysipelotrichaceae	Faecalicoccus	Faecalicoccus pleomorphus
0.0643867374	-0.4420361968	29842139421	-0.1481248347	0.8822442504		Bacteria	Firmicutes	Bacilli	Lactobacillales	Lactobacillaceae	Pediococcus	Pediococcus stilesii
46005361476	-0.2102044005	1423993383	-0.1476161357	0.8826457201	0.9716026672	Bacteria	Firmicutes	Bacilli	Lactobacillales	Enterococcaceae	Enterococcus	Enterococcus saigonensis
23469205814	-0.1341349813	0.9179057891	-0.1461315343	0.8838175529	0.9716026672	Bacteria	Firmicutes	Clostridia	Clostridiales	Clostridiaceae	Thermotalea	Thermotalea metallivorans
0.0504666665	0.4322595227	29787611055	0.1451138602	0.8846209752		Bacteria	Firmicutes	Bacilli	Lactobacillales	Lactobacillaceae	Lactobacillus	Lactobacillus animalis
59633571224	-0.1230948627	0.8519686312	-0.144482858	0.8851191918	0.9716026672	Bacteria	Proteobacteria	Betaproteobacteria	Burkholderiales	Oxalobacteraceae	Oxalobacter	Oxalobacter formigenes
18733347414	0.122828	0.8528115168	0.1440271356	0.8854790419	0.9716026672	Bacteria	Firmicutes	Clostridia	Clostridiales	Peptococcaceae	Desulfitobacterium	Desulfitobacterium hafniense
129340065515	-0.1131584836	0.7863161634	-0.1439096496	0.8855718157	0.9716026672	Bacteria	Firmicutes	Bacilli	Lactobacillales	Lactobacillaceae	Lactobacillus	Lactobacillus sakei
0.8921946188	-0.1784275572	12561314087	-0.1420452955	0.8870442278	0.9716026672	Bacteria	Firmicutes	Tissierellia	Tissierellales	Peptoniphilaceae	Anaerococcus	Anaerococcus senegalensis
1301486859026	0.1253789287	0.8957817243	0.1399659374	0.8886869035	0.9716026672	Bacteria	Firmicutes	Clostridia	Clostridiales	Ruminococcaceae	Ruminococcus	Ruminococcus callidus
0.2765293769	-0.2676880119	194055254	-0.1379442228	0.8902844997		Bacteria	Proteobacteria	Gammaproteobacteria	Enterobacterales	Enterobacteriaceae	Kluyvera	Kluyvera ascorbata
0.1709843641	0.2011007454	14777439417	0.1360863271	0.8917530364		Bacteria	Firmicutes	Bacilli	Lactobacillales	Lactobacillaceae	Lactobacillus	Lactobacillus algidus
0.3541357814	-0.4030719505	29843374959	-0.1350624556	0.8925624942		Bacteria	Firmicutes	Clostridia	Clostridiales	Lachnospiraceae	Robinsoniella	Robinsoniella peoriensis
0.1033602755	-0.2568939619	1934825221	-0.1327737302	0.8943723306		Bacteria	Firmicutes	Clostridia	Clostridiales	Lachnospiraceae	Lachnoclostridium	Lachnoclostridium phytofermentans
0.2372388237	-0.150056028	11525250017	-0.1301976337	0.8964100667		Bacteria	Firmicutes	Clostridia	Clostridiales	Defluviitaleaceae	Defluviitalea	Defluviitalea saccharophila
0.4390799932	-0.169525791	13151386621	-0.128903359	0.8974341188		Bacteria	Firmicutes	Bacilli	Lactobacillales	Streptococcaceae	Streptococcus	Streptococcus sanguinis
798823457051	-0.0632664457	0.4967197864	-0.127368483	0.89864876	0.9801491248	Bacteria	Firmicutes	Clostridia	Clostridiales	Lachnospiraceae	Blautia	Blautia stercoris
0.0911094356	-0.3491962584	27528869059	-0.1268472954	0.8990612618		Bacteria	Firmicutes	Negativicutes	Veillonellales	Veillonellaceae	Dialister	Dialister propionicifaciens
0.0776379778	-0.3550664687	28047490914	-0.1265947353	0.8992611641		Bacteria	Proteobacteria	Gammaproteobacteria	Enterobacterales	Enterobacteriaceae	Kluyvera	Kluyvera cryocrescens
0.544375768	0.2353470814	18949411829	0.1241975653	0.9011588499		Bacteria	Proteobacteria	Gammaproteobacteria	Enterobacterales	Erwiniaceae	Phaseolibacter	Phaseolibacter flectens
101115771333	0.1795506926	14505208101	0.1237836033	0.9014866146	0.9809032926	Bacteria	Firmicutes	Negativicutes	Veillonellales	Veillonellaceae	Allisonella	Allisonella histaminiformans
141044553468	-0.1887140284	15684094606	-0.1203219141	0.9042281453	0.9815493168	Bacteria	Proteobacteria	Deltaproteobacteria	Desulfovibrionales	Desulfovibrionaceae	Desulfovibrio	Desulfovibrio desulfuricans
3200746455	0.2796176204	24098459705	0.1160313248	0.9076277159	0.9824360171	Archaea	Euryarchaeota	Methanobacteria	Methanobacteriales	Methanobacteriaceae	Methanosphaera	Methanosphaera stadtmanae
16094691389319	0.0664439091	0.595040621	0.1116628121	0.9110907665	0.9824360171	Bacteria	Firmicutes	Clostridia	Clostridiales	Ruminococcaceae	Ruminococcus	Ruminococcus bromii
0.1586364817	0.1648113665	14822568973	0.1111894752	0.9114660974		Bacteria	Firmicutes	Clostridia	Clostridiales	Clostridiaceae	Clostridium	Clostridium merdae
139007345503	-0.1300736962	11800936485	-0.1102231982	0.9122323648	0.9824360171	Bacteria	Firmicutes	Clostridia	Clostridiales	Peptostreptococcaceae	Terrisporobacter	Terrisporobacter petrolearius
17090703637	-0.0724998706	0.6685505024	-0.1084433716	0.9136439984	0.9824360171	Bacteria	Firmicutes	Erysipelotrichia	Erysipelotrichales	Erysipelotrichaceae	Solobacterium	Solobacterium moorei
0.284695076	-0.1825737062	17130687316	-0.1065769883	0.9151245753		Bacteria	Firmicutes	Clostridia	Clostridiales	Clostridiaceae	Caloramator	Caloramator boliviensis
0.1903272937	0.2047982656	19262351565	0.1063204899	0.9153280751		Bacteria	Firmicutes	Bacilli	Lactobacillales	Enterococcaceae	Enterococcus	Enterococcus massiliensis
0.2111370833	-0.1923815465	19791093663	-0.097206122	0.9225627064		Bacteria	Firmicutes	Clostridia	Clostridiales	Clostridiaceae	Clostridium	Clostridium oryzae
0.013325312	-0.2776219975	29843374961	-0.093026341	0.9258826349		Bacteria	Firmicutes	Clostridia	Clostridiales	Lachnospiraceae	Lachnoclostridium	citroniae
377187831727	-0.1387097216	15007536168	-0.0924267115	0.9263590176	0.9862570365	Bacteria	Actinobacteria	Coriobacteriia	Coriobacteriales	Coriobacteriaceae	Collinsella	Collinsella bouchesdurhonensis
0.2071684129	-0.1975597999	22064522275	-0.0895373113	0.9286549025		Bacteria	Firmicutes	Bacilli	Lactobacillales	Enterococcaceae	Enterococcus	Enterococcus pallens
0.3204115533	-0.1646051355	18496243582	-0.0889938191	0.9290868223		Bacteria	Actinobacteria	Actinobacteria	Bifidobacteriales	Bifidobacteriaceae	Bifidobacterium	Bifidobacterium gallicum
23920239468	-0.0462646229	0.52389926	-0.0883082425	0.929631688	0.9862570365	Bacteria	Firmicutes	Clostridia	Clostridiales	Lachnospiraceae	Eisenbergiella	Eisenbergiella massiliensis
32079336648	-0.085481616	0.9735927214	-0.0878001798	0.9300354949	0.9862570365	Bacteria	Firmicutes	Erysipelotrichia	Erysipelotrichales	Erysipelotrichaceae	Massilimicrobiota	Massilimicrobiota timonensis
0.419086776	-0.1608813304	18547273393	-0.0867412298	0.9308772032		Bacteria	Bacteroidetes	Bacteroidia	Bacteroidales	Prevotellaceae	Prevotella	Prevotella bivia
0.3886406338	0.1564417599	18812654982	0.0831577255	0.9337261264		Bacteria	Actinobacteria	Coriobacteriia	Coriobacteriales	Coriobacteriaceae	Enorma	massiliensis
0.0978854816	-0.1609203395	19559140507	-0.0822737274	0.934429046		Bacteria	Firmicutes	Clostridia	Clostridiales	Eubacteriaceae	Eubacterium	Eubacterium limosum
845452565269	-0.0592522131	0.7288354246	-0.0812971092	0.9352056729	0.9862570365	Bacteria	Firmicutes	Clostridia	Clostridiales	Ruminococcaceae	Acetanaerobacterium	Acetanaerobacterium elongatum
101860511689	0.0424395417	0.5337122272	0.0795176493	0.936620894	0.9862570365	Bacteria	Firmicutes	Clostridia	Clostridiales	Ruminococcaceae	Subdoligranulum	Subdoligranulum variabile
509876398911	-0.1294240829	1628264384	-0.0794859141	0.9366461351	0.9862570365	Bacteria	Actinobacteria	Coriobacteriia	Eggerthellales	Eggerthellaceae	Adlercreutzia	Adlercreutzia muris
0.1251729233	0.1569070363	19804445525	0.0792281895	0.9368511231		Bacteria	Actinobacteria	Coriobacteriia	Coriobacteriales	Coriobacteriaceae	Collinsella	Collinsella phocaeensis
546915456494	-0.0413701289	0.5277203211	-0.0783940417	0.937514613	0.9862570365	Bacteria	Bacteroidetes	Bacteroidia	Bacteroidales	Odoribacteraceae	Butyricimonas	Butyricimonas faecihominis
0.8249868425	0.0494597848	0.6627380287	0.0746294654	0.9405095295	0.9862570365	Bacteria	Firmicutes	Clostridia	Clostridiales	Lachnospiraceae	Anaerostipes	Anaerostipes butyraticus
1473808249564	-0.0498325374	0.6731995705	-0.0740234242	0.9409917466	0.9862570365	Bacteria	Firmicutes	Clostridia	Clostridiales	Christensenellaceae	Christensenella	Christensenella massiliensis
0.0474398347	0.2204594672	29840356165	0.0738796367	0.9411061591		Bacteria	Bacteroidetes	Bacteroidia	Bacteroidales	Prevotellaceae	Marseilla	Marseilla massiliensis
0.4553786553	-0.0738835235	1023491474	-0.0721877273	0.9424525119		Bacteria	Firmicutes	Clostridia	Clostridiales	Lachnospiraceae	Sellimonas	Sellimonas intestinalis
5615842382	-0.0560570753	0.779589292	-0.0719059072	0.942676789	0.9862570365	Bacteria	Bacteroidetes	Bacteroidia	Bacteroidales	Bacteroidaceae	Bacteroides	Bacteroides fragilis
50409232486	0.0423971901	0.6001751983	0.0706413564	0.943683195	0.9862570365	Bacteria	Actinobacteria	Actinobacteria	Bifidobacteriales	Bifidobacteriaceae	Bifidobacterium	Bifidobacterium breve
13976295892	-0.0899323883	13000110948	-0.0691781698	0.9448477994	0.9862570365	Bacteria	Bacteroidetes	Bacteroidia	Bacteroidales	Prevotellaceae	Prevotella	Prevotella jejuni
0.1885973045	-0.187203887	29842969141	-0.0627296453	0.9499817903		Bacteria	Bacteroidetes	Bacteroidia	Bacteroidales	Prevotellaceae	Paraprevotella	Paraprevotella xylaniphila
0.5483712426	0.1419203979	24200939348	0.0586425163	0.9532368459		Bacteria	Firmicutes	Erysipelotrichia	Erysipelotrichales	Erysipelotrichaceae	Absiella	Absiella tortuosum
0.3053468143	-0.0542233747	0.9413399337	-0.0576023313	0.9540653926		Bacteria	Firmicutes	Clostridia	Clostridiales	Hungateiclostridiaceae	Hungateiclostridium	Hungateiclostridium aldrichii
0.5040326848	-0.0419816497	0.7483785404	-0.0560968112	0.9552646842		Bacteria	Firmicutes	Clostridia	Clostridiales	Lachnospiraceae	Lachnoclostridium	saccharolyticum
561310464741	-0.0442727848	0.7986439951	-0.0554349435	0.9557919577	0.9862570365	Bacteria	Firmicutes	Clostridia	Clostridiales	Ruminococcaceae	Ruminococcus	Ruminococcus champanellensis
4365192156592	-0.0210353954	0.3892754654	-0.0540373007	0.9569054459	0.9862570365	Bacteria	Firmicutes	Clostridia	Clostridiales	Lachnospiraceae	Blautia	Blautia obeum
0.1711432709	-0.1598227597	29839526343	-0.0535607563	0.9572851236		Bacteria	Firmicutes	Erysipelotrichia	Erysipelotrichales	Erysipelotrichaceae	Erysipelothrix	Erysipelothrix inopinata
113280067889	0.0312425444	0.6015785592	0.0519342717	0.9585810662	0.9862570365	Bacteria	Firmicutes	Erysipelotrichia	Erysipelotrichales	Erysipelotrichaceae	Erysipelatoclostridium	saccharogumia
0.060392931	-0.1484013571	28919436796	-0.0513154382	0.9590741664		Bacteria	Bacteroidetes	Bacteroidia	Bacteroidales	Porphyromonadaceae	Porphyromonas	Porphyromonas somerae
69976214821	0.0802283268	16166881169	0.0496251107	0.9604211358	0.9862570365	Bacteria	Proteobacteria	Betaproteobacteria	Burkholderiales	Sutterellaceae	Duodenibacillus	Duodenibacillus massiliensis
72658019228	0.0180653077	0.3684163591	0.0490350313	0.9608913786	0.9862570365	Bacteria	Firmicutes	Clostridia	Clostridiales	Lachnospiraceae	Lachnoclostridium	polysaccharolyticum
74247275491	-0.0289745207	0.6053181175	-0.0478666008	0.9618225576	0.9862570365	Bacteria	Actinobacteria	Coriobacteriia	Eggerthellales	Eggerthellaceae	Gordonibacter	Gordonibacter pamelaeae
0.2609294359	0.0712960626	15864964171	0.0449393153	0.9641556794		Bacteria	Firmicutes	Bacilli	Lactobacillales	Streptococcaceae	Streptococcus	Streptococcus panodentis
0.1536179865	-0.1268626054	29841528694	-0.0425121001	0.966090466		Bacteria	Firmicutes	Bacilli	Lactobacillales	Streptococcaceae	Streptococcus	Streptococcus dentirousetti
0.1528686644	-0.1268626054	29841528694	-0.0425121001	0.966090466		Bacteria	Firmicutes	Bacilli	Lactobacillales	Streptococcaceae	Streptococcus	Streptococcus downei
0.0813773474	0.1240372709	29841528701	0.0415653206	0.9668452195		Bacteria	Proteobacteria	Gammaproteobacteria	Enterobacterales	Yersiniaceae	Serratia	Serratia aquatilis
28171486732	0.0384450511	0.9270504424	0.0414702904	0.9669209773	0.9862570365	Bacteria	Firmicutes	Bacilli	Lactobacillales	Streptococcaceae	Streptococcus	Streptococcus anginosus
0.4801259246	0.0539403094	13066674172	0.0412808253	0.9670720192		Bacteria	Actinobacteria	Actinobacteria	Micrococcales	Dermatophilaceae	Kineosphaera	Kineosphaera limosa
3878355153214	0.0246439375	0.6377843451	0.0386399222	0.9691774727	0.9862570365	Bacteria	Bacteroidetes	Bacteroidia	Bacteroidales	Barnesiellaceae	Barnesiella	Barnesiella intestinihominis
20056653239	-0.0152914834	0.4042033586	-0.0378311637	0.9698222971	0.9862570365	Bacteria	Firmicutes	Clostridia	Clostridiales	Ruminococcaceae	Anaeromassilibacillus	Anaeromassilibacillus senegalensis
120068207756	-0.0165195924	0.4416770549	-0.037401971	0.9701645011	0.9862570365	Bacteria	Firmicutes	Clostridia	Clostridiales	Ruminococcaceae	Pseudoflavonifractor	Pseudoflavonifractor capillosus
103571625618	0.0294310717	0.8426240721	0.0349278791	0.9721372498	0.9862570365	Bacteria	Firmicutes	Clostridia	Clostridiales	Lachnospiraceae	Lachnobacterium	Lachnobacterium bovis
0.249226828	-0.0807628867	234858791	-0.0343878491	0.9725678727		Bacteria	Proteobacteria	Gammaproteobacteria	Enterobacterales	Hafniaceae	Hafnia	Hafnia paralvei
84621875198	0.0242657552	0.7084863949	0.0342501358	0.9726776874	0.9862570365	Bacteria	Firmicutes	Bacilli	Lactobacillales	Streptococcaceae	Streptococcus	Streptococcus anginosus;Streptococcus anginosus subsp. whileyi
592484591	-0.0358704575	10900368123	-0.0329075652	0.9737482999	0.9862570365	Bacteria	Firmicutes	Bacilli	Lactobacillales	Streptococcaceae	Lactococcus	Lactococcus lactis;Lactococcus lactis subsp. cremoris
0.0947358727	0.0950095615	29840356157	0.0318392854	0.9746002173		Bacteria	Proteobacteria	Gammaproteobacteria	Enterobacterales	Hafniaceae	Hafnia	Hafnia alvei
114077819531	-0.0269749817	0.8576399383	-0.0314525717	0.9749086157	0.9862570365	Bacteria	Firmicutes	Clostridia	Clostridiales	Lachnospiraceae	Tyzzerella	Tyzzerella nexilis
15584935495	0.0378687	13067158993	0.028980056	0.9768804969	0.9862570365	Bacteria	Firmicutes	Clostridia	Clostridiales	Clostridiaceae	Clostridium	Clostridium tertium
208885482414	-0.00849168	0.3027650482	-0.0280470947	0.9776245897	0.9862570365	Bacteria	Firmicutes	Clostridia	Clostridiales	Ruminococcaceae	Pseudoflavonifractor	Pseudoflavonifractor phocaeensis
0.261020393	0.0599551145	22150823158	0.0270667659	0.978406482		Bacteria	Actinobacteria	Coriobacteriia	Eggerthellales	Eggerthellaceae	Slackia	Slackia exigua
0.2960495563	0.0484667984	18686020568	0.0259374639	0.9793072182		Bacteria	Firmicutes	Bacilli	Lactobacillales	Lactobacillaceae	Lactobacillus	Lactobacillus graminis
4028864374484	0.0153156567	0.6536673294	0.0234303537	0.9813069929	0.9871665471	Bacteria	Firmicutes	Clostridia	Clostridiales	Eubacteriaceae	Eubacterium	Eubacterium coprostanoligenes
0.4326449959	0.0305399709	1399924093	0.0218154477	0.9825951716		Bacteria	Firmicutes	Clostridia	Clostridiales	Clostridiaceae	Clostridium	Clostridium swellfunianum
0.0196471527	-0.0617539487	29842969145	-0.020692964	0.9834905817		Bacteria	Firmicutes	Clostridia	Clostridiales	Clostridiaceae	Clostridium	Clostridium punense
0.7510007726	-0.0429333262	21048642076	-0.0203971952	0.9837265213	0.9871665471	Bacteria	Proteobacteria	Betaproteobacteria	Burkholderiales	Oxalobacteraceae	Massilia	Massilia suwonensis
0.0780494572	0.0576979195	2830041569	0.0203876579	0.9837341293		Bacteria	Firmicutes	Bacilli	Lactobacillales	Lactobacillaceae	Lactobacillus	Lactobacillus sucicola
1351245126043	-0.0069837684	0.3716205451	-0.0187927403	0.9850064452	0.9871665471	Bacteria	Firmicutes	Clostridia	Clostridiales	Ruminococcaceae	Agathobaculum	Agathobaculum butyriciproducens
0.124146972	-0.0311969476	2234315258	-0.0139626436	0.9888597842		Bacteria	Proteobacteria	Gammaproteobacteria	Enterobacterales	Erwiniaceae	Pantoea	Pantoea dispersa
0.0521219366	0.0311362114	29842227107	0.0104336085	0.9916753359		Bacteria	Bacteroidetes	Bacteroidia	Bacteroidales	Lentimicrobiaceae	Lentimicrobium	Lentimicrobium saccharophilum
10350850247	0.0032043618	10013032474	0.0032001911	0.9974466213	0.9974466213	Bacteria	Firmicutes	Negativicutes	Veillonellales	Veillonellaceae	Veillonella	Veillonella tobetsuensis
0.2099283033	0.0042212774	15066051138	0.0028018473	0.9977644523		Bacteria	Bacteroidetes	Bacteroidia	Bacteroidales	Bacteroidaceae	Bacteroides	Bacteroides stercorirosoris
0.5277862555	-0.0019338962	0.9373424465	-0.0020631693	0.9983538302		Bacteria	Firmicutes	Clostridia	Clostridiales	Eubacteriaceae	Eubacterium	Eubacterium uniforme
0.0624660047	-0.0014126673	29841528698	-0.0004733897	0.9996222897		Bacteria	Firmicutes	Clostridia	Clostridiales	Lachnospiraceae	Cuneatibacter	Cuneatibacter caecimuris
